# Supplementary material for: Internal Coulombic assistance in intermolecular frustrated Lewis pair activation of dihydrogen
Source: Royal Society of Chemistry journal article supplement (doi:10.1039/d4nj00523f), 2024-01-01
Supplement: d4nj00523f1.pdf [file d4nj00523f1.pdf]

## Supporting Information

### Internal Coulombic Assistance in Intermolecular Frustrated Lewis Pairs Activation of Dihydrogen

Alicia Rey Planells<sup>a</sup>, Arturo Espinosa Ferao<sup>\*a</sup>, Rainer Streubel<sup>\*b</sup> and Antonio Frontera<sup>c</sup>

<sup>a</sup> Departamento de Química Orgánica, Facultad de Química, Campus de Espinardo, Universidad de Murcia, 30100 Murcia (Spain), E-mail: artuesp@um.es.

<sup>b</sup> Institut für Anorganische Chemie, Rheinische Friedrich-Wilhelms-Universität Bonn (Germany). E-mail: r.streubel@uni-bonn.de

<sup>c</sup> Departament de Química, Universitat de les Illes Balears, 07122 Palma de Mallorca (Spain).

#### Table of contents

|                                                                                                                                 |        |
|---------------------------------------------------------------------------------------------------------------------------------|--------|
| <a href="#">Table S1.</a> Reaction energies values calculated relative to <b>3</b> .                                            | S2     |
| <a href="#">Table S2.</a> Computed geometric and bond parameters in <b>3</b> .                                                  | S3     |
| <a href="#">Table S3.</a> E-Si bond distances and BDE for <b>3</b> and sum of MEC at the SiF <sub>4</sub> group.                | S4     |
| <a href="#">Scheme S1.</a> Triple concerted shift in Si-CF <sub>3</sub> -substituted PH-bridged zwitterionic species <b>3</b> . | S4     |
| <a href="#">Figure S1.</a> Computed BCPs and bond paths for <b>3<sup>Ca</sup></b> and <b>3<sup>Nc</sup></b> .                   | S4     |
| <a href="#">Figure S2.</a> Peripheral noncovalent interactions between Me <sub>3</sub> P=S and SiF <sub>4</sub> .               | S4     |
| <a href="#">Figure S3.</a> Computed representation of the $\nabla^2\rho$ vs C-Si bond path for <b>3<sup>Ca</sup></b> .          | S5     |
| <a href="#">Figure S4.</a> Computed representation of the $\nabla^2\rho$ vs Si-Si bond path for <b>3<sup>Si</sup>a</b> .        | S5     |
| <a href="#">Figure S5.</a> Computed representation of the $\nabla^2\rho$ vs N-Si bond path for <b>3<sup>Na</sup></b> .          | S6     |
| <a href="#">Figure S6.</a> Computed representation of the $\nabla^2\rho$ vs P-Si bond path for <b>3<sup>Pa</sup></b> .          | S6     |
| <a href="#">Figure S7.</a> Computed representation of the $\nabla^2\rho$ vs O-Si bond path for <b>3<sup>O</sup>a</b> .          | S7     |
| <a href="#">Figure S8.</a> Computed Kohn-Sham isosurfaces for LUMO in (a) <b>3<sup>Oh</sup></b> and (b) <b>3<sup>Oj</sup></b> . | S7     |
| Computational Details                                                                                                           | S8     |
| Cartesian coordinates and energies for all calculated structures                                                                | S9-S80 |

**Table S1.** Reaction energies values with the zero-point vibrational term corrected (kcal/mol) calculated (CCSD(T)/def2-TZVPP//B3LYP-D4/def2-TZVP) relative to species **3**.

|                        | E                | X               | Y               | <b>1+2</b> | <b>4+5<sup>a)</sup></b> |
|------------------------|------------------|-----------------|-----------------|------------|-------------------------|
| <b>3<sup>C</sup>a</b>  | CH <sub>2</sub>  | Me              | F               | 18.06      | 43.07                   |
| <b>3<sup>C</sup>b</b>  |                  | Me              | CF <sub>3</sub> | 33.76      | 61.47                   |
| <b>3<sup>C</sup>c</b>  |                  | NH <sub>2</sub> | F               | 19.34      | 53.12                   |
| <b>3<sup>C</sup>d</b>  |                  | NH <sub>2</sub> | CF <sub>3</sub> | 32.99      | 69.48                   |
| <b>3<sup>C</sup>e</b>  |                  | Tms             | F               | 26.83      | 30.18                   |
| <b>3<sup>C</sup>f</b>  |                  | Tms             | CF <sub>3</sub> | 41.30      | 47.36                   |
| <b>3<sup>Si</sup>a</b> | SiH <sub>2</sub> | Me              | F               | -1.98      | -6.38                   |
| <b>3<sup>Si</sup>b</b> |                  | Me              | CF <sub>3</sub> | 18.67      | 13.37                   |
| <b>3<sup>Si</sup>c</b> |                  | NH <sub>2</sub> | F               | 1.50       | -2.38                   |
| <b>3<sup>Si</sup>d</b> |                  | NH <sub>2</sub> | CF <sub>3</sub> | 21.18      | 16.40                   |
| <b>3<sup>Si</sup>e</b> |                  | Tms             | F               | 0.66       | -8.74                   |
| <b>3<sup>Si</sup>f</b> |                  | Tms             | CF <sub>3</sub> | 20.13      | 9.84                    |
| <b>3<sup>N</sup>a</b>  | NH               | Me              | F               | 18.88      | 101.76                  |
| <b>3<sup>N</sup>b</b>  |                  | Me              | CF <sub>3</sub> | 29.31      | 115.69                  |
| <b>3<sup>N</sup>c</b>  |                  | NH <sub>2</sub> | F               | 16.90      | 110.02                  |
| <b>3<sup>N</sup>d</b>  |                  | NH <sub>2</sub> | CF <sub>3</sub> | 28.41      | 125.03                  |
| <b>3<sup>N</sup>e</b>  |                  | Tms             | F               | 28.33      | 82.33                   |
| <b>3<sup>N</sup>f</b>  |                  | Tms             | CF <sub>3</sub> | 34.90      | 92.39                   |
| <b>3<sup>P</sup>a</b>  | PH               | Me              | F               | -2.82      | 29.24                   |
| <b>3<sup>P</sup>b</b>  |                  | Me              | CF <sub>3</sub> | 9.52       | 41.13                   |
| <b>3<sup>P</sup>c</b>  |                  | NH <sub>2</sub> | F               | -3.11      | 33.54                   |
| <b>3<sup>P</sup>d</b>  |                  | NH <sub>2</sub> | CF <sub>3</sub> | 11.49      | 47.71                   |
| <b>3<sup>P</sup>e</b>  |                  | Tms             | F               | 1.39       | 21.47                   |
| <b>3<sup>P</sup>f</b>  |                  | Tms             | CF <sub>3</sub> | 11.98      | 31.63                   |
| <b>3<sup>O</sup>a</b>  | O                | Me              | F               | 1.05       | 133.09                  |
| <b>3<sup>O</sup>b</b>  |                  | Me              | CF <sub>3</sub> | 20.57      | 10.83                   |
| <b>3<sup>O</sup>c</b>  |                  | NH <sub>2</sub> | F               | 9.08       | 152.25                  |
| <b>3<sup>O</sup>d</b>  |                  | NH <sub>2</sub> | CF <sub>3</sub> | 20.04      | 21.45                   |
| <b>3<sup>O</sup>e</b>  |                  | Tms             | F               | 15.51      | 113.93                  |
| <b>3<sup>O</sup>f</b>  |                  | Tms             | CF <sub>3</sub> | 29.36      | -13.99                  |
| <b>3<sup>S</sup>a</b>  | S <sup>b)</sup>  | Me              | F               | 2.99       | 84.37                   |
| <b>3<sup>S</sup>b</b>  |                  | Me              | CF <sub>3</sub> | -1.09      | 6.27                    |
| <b>3<sup>S</sup>c</b>  |                  | NH <sub>2</sub> | F               | 3.65       | 90.48                   |
| <b>3<sup>S</sup>d</b>  |                  | NH <sub>2</sub> | CF <sub>3</sub> | 3.76       | 16.58                   |
| <b>3<sup>S</sup>e</b>  |                  | Tms             | F               | -4.72      | 58.55                   |
| <b>3<sup>S</sup>f</b>  |                  | Tms             | CF <sub>3</sub> | 5.82       | -4.91                   |

<sup>a</sup> **5'** stands for Y-E-SiY<sub>3</sub>

<sup>b</sup> **3<sup>S</sup>** correspond to compounds **1<sup>S</sup>·2a-f**

**Table S2.** Computed (B3LYP-D4/def2-TZVP) P-Si distance (Å), Löwdin atomic charges (in brackets) and WBI (parenthesis) data in species **3**.

| X               | Y               | E                       |                         |                          |
|-----------------|-----------------|-------------------------|-------------------------|--------------------------|
|                 |                 | CH <sub>2</sub>         | SiH <sub>2</sub>        | NH                       |
| Me              | F               | 3.055                   | 3.494                   | 3.065                    |
|                 |                 | [0.76/-0.43]<br>(0.000) | [0.68/-0.53]<br>(0.014) | [0.66/-0.48]<br>(0.006)  |
| Me              | CF <sub>3</sub> | 3.312                   | 3.881                   | 3.240                    |
|                 |                 | [0.76/0.20]<br>(0.008)  | [0.69/0.11]<br>(0.009)  | [0.58/0.14]<br>(0.012)   |
| NH <sub>2</sub> | F               | 2.994                   | 3.418                   | 3.046                    |
|                 |                 | [0.46/-0.42]<br>(0.014) | [0.40/-0.53]<br>(0.019) | [0.39/-0.49]<br>(0.006)  |
| NH <sub>2</sub> | CF <sub>3</sub> | 3.240                   | 3.765                   | 3.182                    |
|                 |                 | [0.47/0.20]<br>(0.009)  | [0.40/0.10]<br>(0.012)  | [0.37/0.15]<br>(0.011)   |
| Tms             | F               | 3.213                   | 3.762                   | 3.115                    |
|                 |                 | [0.61/-0.41]<br>(0.005) | [0.49/-0.52]<br>(0.004) | [0.58/-0.34]<br>(0.009)  |
| Tms             | CF <sub>3</sub> | 3.452                   | 4.189                   | 3.432                    |
|                 |                 | [0.57/0.31]<br>(0.010)  | [0.50/0.11]<br>(0.008)  | [0.51/0.16]<br>(0.0161)  |
| X               | Y               | E                       |                         |                          |
|                 |                 | PH                      | O                       | S                        |
| Me              | F               | 3.446                   | 2.979                   | 4.214                    |
|                 |                 | [0.59/-0.56]<br>(0.012) | [0.61/-0.50]<br>(0.006) | [0.35/-0.35]<br>(0.001)  |
| Me              | CF <sub>3</sub> | 3.696                   | 3.207                   | 3.548                    |
|                 |                 | [0.51/-0.09]<br>(0.010) | [0.61/0.17]<br>(0.012)  | [0.13/-0.24]<br>(0.007)  |
| NH <sub>2</sub> | F               | 3.287                   | 3.168                   | 4.089                    |
|                 |                 | [0.30/-0.56]<br>(0.020) | [0.28/-0.47]<br>(0.003) | [-0.21/-0.83]<br>(0.001) |
| NH <sub>2</sub> | CF <sub>3</sub> | 3.514                   | 3.156*                  | 4.108                    |
|                 |                 | [0.30/0.10]<br>(0.015)  | [0.27/0.13]<br>(0.011)  | [-0.24/-0.14]<br>(0.004) |
| Tms             | F               | 3.643                   | 3.015                   | 3.558                    |
|                 |                 | [0.44/-0.59]<br>(0.007) | [0.51/-0.53]<br>(0.009) | [0.16/ -0.97]<br>(0.006) |
| Tms             | CF <sub>3</sub> | 4.165                   | 3.271*                  | 4.213                    |
|                 |                 | [0.41/0.17]<br>(0.005)  | [0.35/0.04]<br>(0.021)  | [0.06/-0.24]<br>(0.004)  |

\* Almost linear P-E-Si arrangement

**Table S3.** E-Si bond distances for 1,3-zwitterionic dipoles Me<sub>3</sub>P-E-SiF<sub>4</sub> (**3**) and their simplified HE-SiF<sub>4</sub> counterparts (in parenthesis), homolytic (left) and heterolytic (right) Bond Dissociation Energies (BDE) for **3** and sum of (Mulliken) electric charge (a.u.) at the SiF<sub>4</sub> group.

|                        | $d_{E-Si}^a$     | BDE <sup>b</sup> | $\Sigma q_{SiF_4}^M$ |
|------------------------|------------------|------------------|----------------------|
| <b>3<sup>C</sup>a</b>  | 1.954<br>(1.900) | 99.66/200.30     | -0.556               |
| <b>3<sup>Si</sup>a</b> | 2.402<br>(2.379) | 67.78/176.58     | -0.532               |
| <b>3<sup>N</sup>a</b>  | 1.804<br>(1.730) | 96.55/229.54     | -0.531               |
| <b>3<sup>P</sup>a</b>  | 2.357<br>(2.305) | 63.09/176.93     | -0.504               |
| <b>3<sup>O</sup>a</b>  | 1.803<br>(1.686) | 67.39/245.86     | -0.471               |
| <b>3<sup>S</sup>a</b>  | 3.422<br>(2.211) | 4.89/258.95      | -0.049               |

<sup>a</sup> Å; <sup>b</sup> kcal/mol

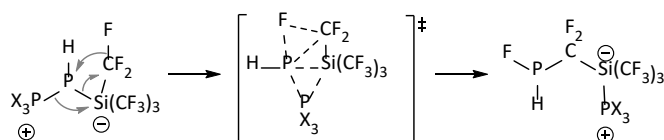

**Scheme S1.** Triple concerted shift in Si-CF<sub>3</sub>-substituted PH-bridged zwitterionic species **3<sup>P</sup>**.

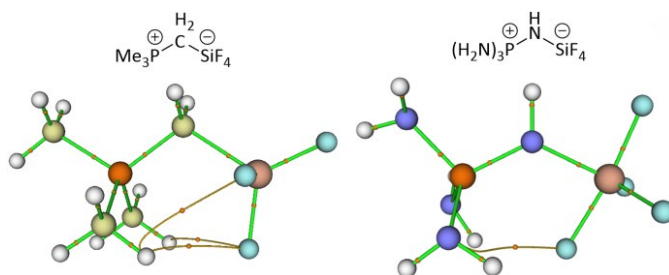

**Figure S1.** Computed (B3LYP/def2-TZVP) structures for dipolar molecules **3** with short P-Si contacts (**3<sup>C</sup>a** and **3<sup>N</sup>c**), showing BCPs (small orange spheres) and bond paths.

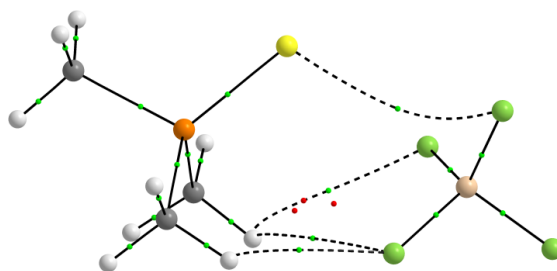

**Figure S2.** Peripheral noncovalent interactions in the encounter complex between Me<sub>3</sub>P=S and SiF<sub>4</sub>.

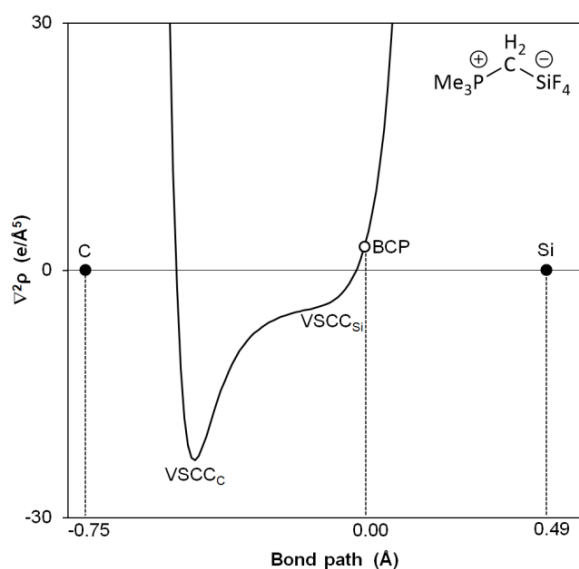

**Figure S3.** Computed (B3LYP-D3/def2-TZVPPecp) representation of the Laplacian of electron density  $\nabla^2\rho$  variation along the C-Si bond path for **3<sup>c</sup>a**.

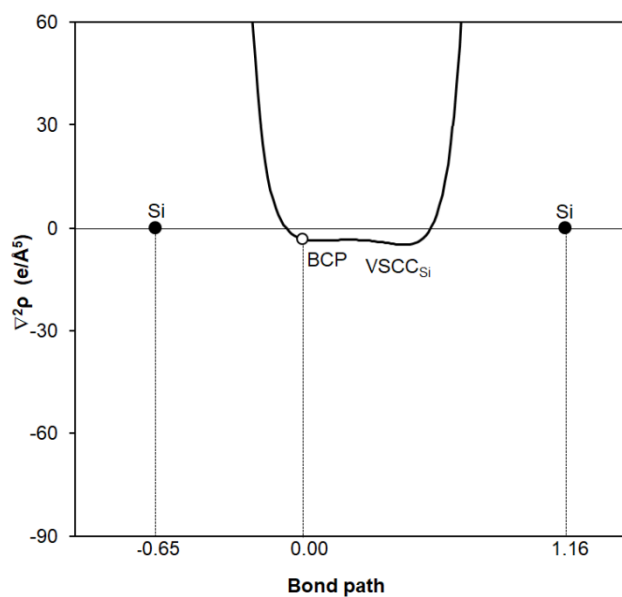

**Figure S4.** Computed (B3LYP-D3/def2-TZVPPecp) representation of the Laplacian of electron density  $\nabla^2\rho$  variation along the Si-Si bond path for **3<sup>Si</sup>a**.

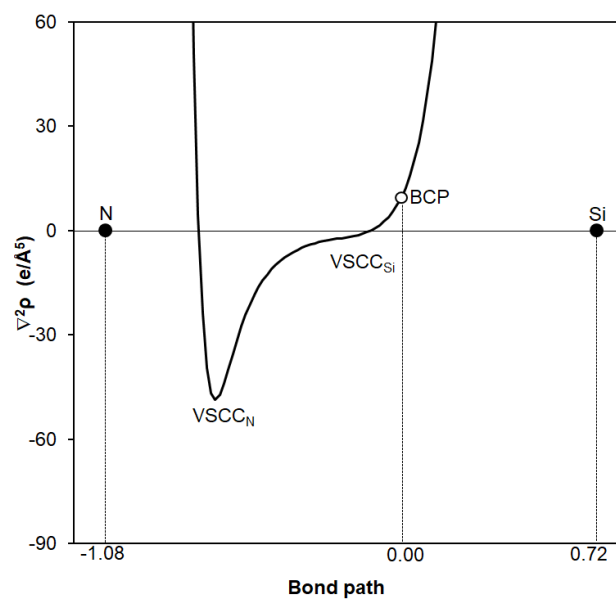

**Figure S5.** Computed (B3LYP-D3/def2-TZVPPecp) representation of the Laplacian of electron density  $\nabla^2\rho$  variation along the N-Si bond path for **3<sup>Na</sup>**.

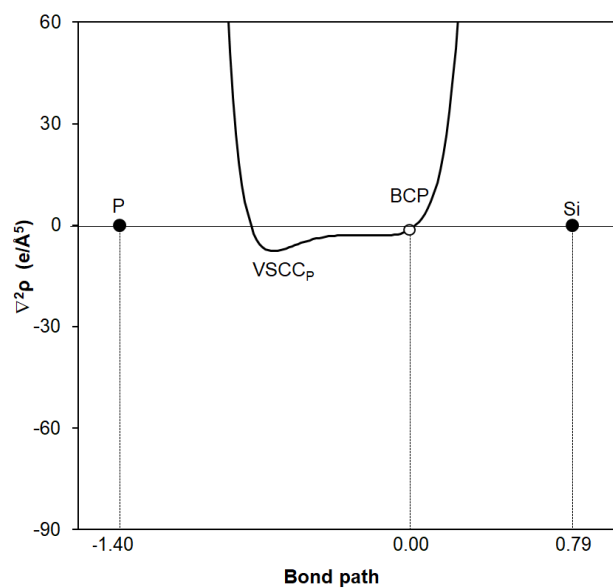

**Figure S6.** Computed (B3LYP-D3/def2-TZVPPecp) representation of the Laplacian of electron density  $\nabla^2\rho$  variation along the P-Si bond path for **3<sup>Pa</sup>**.

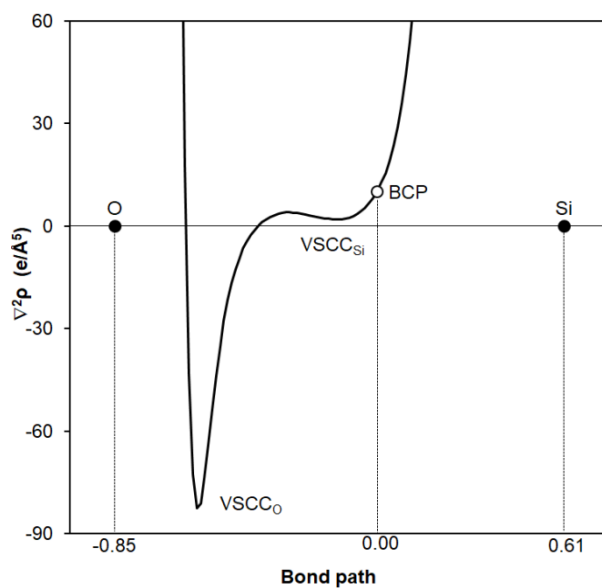

**Figure S7.** Computed (B3LYP-D3/def2-TZVPPecp) representation of the Laplacian of electron density  $\nabla^2\rho$  variation along the O–Si bond path for **3<sup>o</sup>a**.

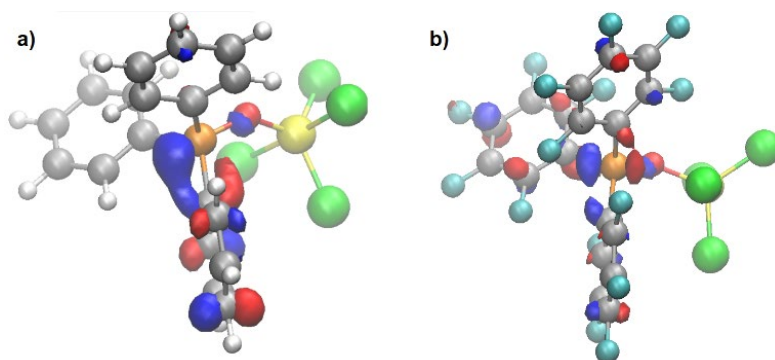

**Figure S8.** Computed (PWPB95-D3/def2-TZVPP//PBEh-3c) Kohn–Sham isosurfaces (0.07 au) for LUMO in (a) **3<sup>oh</sup>** and (b) **3<sup>oj</sup>**.

## Experimental Section

DFT calculations were performed with the ORCA program.<sup>[1]</sup> All geometry optimizations were run in redundant internal coordinates in the gas phase, with tight convergence criteria, and using the B3LYP<sup>[2]</sup> functional together with the RIJCOSX algorithm,<sup>[3]</sup> the 2010 Grimme's semiempirical atom-pair-wise London dispersion correction (DFT-D4)<sup>[4]</sup> and the Ahlrichs segmented def2-TZVP basis set.<sup>[5]</sup> Only for those molecules that participate in the H<sub>2</sub> activation reaction (Figure 1) the optimization has been carried out with the faster and computationally less expensive Grimme's functional PBEh-3c.<sup>[6]</sup> Harmonic frequency calculations verified the nature of ground states or TS having all real (positive) frequencies or only one imaginary (negative) frequency, respectively. From these optimized geometries, all reported data were obtained by means of single-point (SP) calculations using the more polarized def2-TZVPP<sup>[7]</sup> basis set. Reported energies were corrected for the zero-point vibrational term at the optimization level and obtained by means of the recently developed near-linear scaling domain-based local pair natural orbital (DLPNO) method<sup>[8]</sup> to achieve coupled cluster theory with single, double, and perturbative triple excitations (CCSD(T)).<sup>[9]</sup> Properties derived from the topological analysis of the electronic density were obtained with the Multiwfn program,<sup>[10]</sup> whereas Figure 2 and was drawn with Visual Molecular Dynamics (VMD).<sup>[11]</sup>

- 1 ORCA - An ab initio, DFT and semiempirical SCF-MO package. Written by F. Neese, Max Planck Institute for Bioinorganic Chemistry, D-45470 Mülheim/Ruhr, 2019. Version 4.2.1. Website: <https://orcaforum.kofo.mpg.de/index.php>. F. Neese, *WIREs Comput. Mol. Sci.* 2012, **2**, 73–78; F. Neese, *WIREs Comput. Mol. Sci.* 2018, **8**, e1327.
- 2 (a) C. Lee, W. Yang and R. G. Parr, *Phys. Rev.* 1988, **37**, 785–789; (b) A. D. Becke, *J. Chem. Phys.* 1993, **98**, 5648–5652; (c) T. Weymuth, E. P. A. Couzijn, P. Chen and M. Reiher, *J. Chem. Theory Comput.* 2014, **10**, 3092–3103; (d) M. G. Delcey, K. Perloot, Q. M. Phung, S. Vancoillie, R. Lindh and U. Ryde, *Phys. Chem. Chem. Phys.* 2014, **16**, 7927–7938.
- 3 F. Neese, F. Wennmohs, A. Hansen and U. Becker, *J. Chem. Phys.* 2009, **356**, 98–109.
- 4 (a) E. Caldeweyher, S. Ehlert, A. Hansen, H. Neugebauer, S. Spicher, C. Bannwarth, S. Grimme, *J. Chem. Phys.*, 2019, **150**, 154122; (b) E. Caldeweyher, C. Bannwarth, S. Grimme, *J. Chem. Phys.*, 2017, **147**, 034112. (c) E. Caldeweyher, J.-M. Mewes, S. Ehlert, S. Grimme, *Phys. Chem. Chem. Phys.*, 2020, **22**, 8499–8512.
- 5 F. Weigend and R. Ahlrichs, *Phys. Chem. Chem. Phys.* 2005, **7**, 3297–3305.
- 6 S. Grimme, J. G. Brandenburg, C. Bannwarth, and A. Hansen, *J. Chem. Phys.*, 2015, **143**, 05410.
- 7 (a) A. Schafer, C. Huber and R. Ahlrichs, *J. Chem. Phys.* 1994, **100**, 5829–5835, basis sets may be obtained from the Basis Set Exchange (BSE) software and the Basis Set Exchange library: <https://www.basissetexchange.org/>; (b) B. P. Pritchard, D. Altarawy, B. Didier, T. D. Gibson and T. L. Windus. *J. Chem. Inf. Model.* 2019, **59**, 4814–4820.
- 8 C. Riplinger, B. Sandhoefer, A. Hansen and F. Neese, *J. Chem. Phys.* 2013, **139**, 134101.
- 9 J. A. Pople, M. Head-Gordon and K. Raghavachari, *J. Chem. Phys.* 1987, **87**, 5968–5975.
- 10 T. A. Keith, AIMAll, Ver. 14.06.21; TK Gristmill Software: Overland Park, Kansas, U.S.A., [aim.tkgristmill.com](http://aim.tkgristmill.com), 2014.
- 11 W. Humphrey, A. Dalke, K. Schulten, VMD: Visual molecular dynamics. *J. Mol. Graphics* 1996, **14**, 33–38.



## Calculated structures

Cartesian coordinates (in Å), G correction (G-E) and ZPE (in hartrees) for TSs and minima were computed at B3LYP-D4/def2-TZVP. For TSs the imaginary frequency is given. In addition, electronic energies (in hartrees) are quoted using, unless otherwise indicated, the default DLPNO-CCSD(T)/def2-TZVPP(ecp) level and for those molecules corresponding to the energy profile (Figure 1) at the DLPNO-CCSD(T)/def2-TZVPP(ecp)//PBEh-3c level (indicated).

**1<sup>c</sup>a (Me<sub>3</sub>P=CH<sub>2</sub>)** E = -499.619588986455 au

ZPE = 0.13658274 au

G = 0.10566015 au

|   |                   |                   |                   |
|---|-------------------|-------------------|-------------------|
| P | -3.85323603672128 | 1.39762638486176  | 0.00190958042454  |
| C | -4.66800320780442 | 1.56271291046078  | 1.64010109409087  |
| H | -4.28528830424310 | 2.46179130618256  | 2.12674039132370  |
| H | -5.75506619059520 | 1.63717503702862  | 1.56433131582664  |
| H | -4.39581154719651 | 0.70515520050243  | 2.25512248752701  |
| C | -4.66514957948196 | 2.76712647691078  | -0.91283970410972 |
| H | -4.40092749873157 | 2.68866002850379  | -1.96722529625343 |
| H | -5.75138915264151 | 2.76347344485826  | -0.79914186463234 |
| H | -4.27365866699687 | 3.71367754008254  | -0.53560960945712 |
| C | -4.54139219076527 | -0.12136789371683 | -0.71241458842354 |
| H | -5.63093779010343 | -0.09507770366906 | -0.69128383274909 |
| H | -4.20512427967447 | -0.22158668203652 | -1.74369123251365 |
| H | -4.19277837096755 | -0.98043930122725 | -0.14016062667239 |
| C | -2.19507016121103 | 1.34818405535866  | -0.02354674402858 |
| H | -1.69993775130447 | 0.47429643268638  | -0.41666485327917 |
| H | -1.59620749156128 | 2.16224709321304  | 0.35623582292628  |

**1<sup>c</sup>b ((NH<sub>2</sub>)<sub>3</sub>P=CH<sub>2</sub>)** E = -547.778618967859 au

ZPE = 0.10599803 au

G = 0.07600506 au

|   |                   |                   |                   |
|---|-------------------|-------------------|-------------------|
| P | -4.06302406789984 | 1.39752183049951  | 0.01523449464953  |
| C | -2.43340583212944 | 1.20749784664072  | 0.16500867113134  |
| H | -1.89337384477797 | 0.68564061467671  | -0.61140497574430 |
| H | -1.87744480200177 | 1.83805971275235  | 0.84325619773817  |
| N | -4.68360902741050 | 1.72955155152851  | 1.53181309565415  |
| H | -5.64107219638335 | 2.03766663072154  | 1.60782421849147  |
| H | -4.40450222881094 | 1.10512364330563  | 2.27246481557992  |
| N | -4.85289858900376 | 0.09478370827920  | -0.69987045477842 |
| H | -4.50620532566980 | -0.80998987168148 | -0.41499814718108 |
| H | -4.95152335928278 | 0.16138057886258  | -1.70258651361037 |
| N | -4.74570594071798 | 2.59445756886433  | -0.97212088945545 |

|   |                   |                  |                   |
|---|-------------------|------------------|-------------------|
| H | -5.74871453275934 | 2.73187699787433 | -0.96270341418818 |
| H | -4.24211444315240 | 3.46878361767603 | -0.95679159828681 |

**1<sup>c</sup>** (Tms<sub>3</sub>P=CH<sub>2</sub>) E = -1605.944359611334 au  
 ZPE = 0.36098181 au  
 G = 0.30948811 au

|    |                   |                   |                   |
|----|-------------------|-------------------|-------------------|
| P  | 0.15400583085553  | 0.28666032169297  | -0.01196195795053 |
| Si | -0.11307757832182 | 2.56817401983145  | -0.30989599365034 |
| Si | -1.49524156560981 | -0.41718870506135 | 1.39038427037284  |
| Si | -0.14114582234416 | -0.72046685946760 | -2.02815928998049 |
| C  | 0.62551054689940  | 3.36670242247037  | 1.22043628608226  |
| H  | 0.76157121771476  | 4.44002233302368  | 1.06347169327798  |
| H  | -0.00606395171631 | 3.23336208627319  | 2.09986075024227  |
| H  | 1.60138909228766  | 2.92800933636370  | 1.43872907714448  |
| C  | 0.93419107411879  | 3.04648834997583  | -1.79895621319589 |
| H  | 0.51581918015149  | 2.67824129884546  | -2.73696991547810 |
| H  | 1.01111685397813  | 4.13462344707334  | -1.87411666101066 |
| H  | 1.94642683633511  | 2.64866892532523  | -1.69943230570937 |
| C  | -1.89077983920599 | 3.14760615692607  | -0.55662214119422 |
| H  | -1.91406024127581 | 4.22596843979956  | -0.73996310541418 |
| H  | -2.36643546820441 | 2.65660260587564  | -1.40717747259020 |
| H  | -2.49979168258541 | 2.95342901851655  | 0.32836211050194  |
| C  | -1.50774172730222 | 0.13232389275148  | -2.99846468881207 |
| H  | -1.25732851146885 | 1.16820332544742  | -3.23101069173855 |
| H  | -1.66577687825257 | -0.38859556107472 | -3.94686550048165 |
| H  | -2.45502350204962 | 0.12749575212287  | -2.45688486964979 |
| C  | 1.49664922909715  | -0.58813043740002 | -2.92982408193818 |
| H  | 1.44419373428298  | -1.11819066954566 | -3.88477449971211 |
| H  | 1.77066393878307  | 0.44767345281296  | -3.13328046569838 |
| H  | 2.29031357695558  | -1.04155009732785 | -2.33385586196482 |
| C  | -0.56292403435289 | -2.52518373164395 | -1.74516092228189 |
| H  | -1.57194468764230 | -2.65883560928456 | -1.35210238814308 |
| H  | -0.49886664563938 | -3.07412917886020 | -2.68863272930834 |
| H  | 0.14478612506832  | -2.96918947003195 | -1.04359447785896 |
| C  | -1.49339410035432 | 0.71894895469380  | 2.88623709498932  |
| H  | -1.81129674250167 | 1.73108919513387  | 2.63183698409901  |
| H  | -2.18150282300128 | 0.33558098869373  | 3.64484036506070  |
| H  | -0.50062982685682 | 0.77894783863297  | 3.33575587971435  |
| C  | -3.16168353957470 | -0.33060676400449 | 0.52585605362584  |
| H  | -3.22341972816868 | -1.04266980335460 | -0.29886709445684 |
| H  | -3.95756399869798 | -0.57745217179313 | 1.23411622837384  |
| H  | -3.36822328608142 | 0.66462780545735  | 0.13031637397997  |
| C  | -1.09011163533445 | -2.16617801015103 | 1.91482605266663  |

|   |                   |                   |                   |
|---|-------------------|-------------------|-------------------|
| H | -1.72519854210515 | -2.46713276707766 | 2.75261962069142  |
| H | -1.24036839619028 | -2.87670654694638 | 1.10183454703529  |
| H | -0.04507739995804 | -2.23292565206487 | 2.22057437703241  |
| C | 1.65355253033340  | -0.31071400266923 | 0.60645219546940  |
| H | 1.82639205229762  | -0.11954147775879 | 1.66238768091643  |
| H | 2.51924062563737  | -0.11168175222150 | -0.01858571305773 |

**1<sup>Si</sup>a (Me<sub>3</sub>P=SiH<sub>2</sub>)** E = -750.655268432920 au

ZPE = 0.12887738 au

G = 0.09582512 au

|    |                   |                   |                   |
|----|-------------------|-------------------|-------------------|
| P  | -3.92254188618552 | 1.30484970326826  | 0.06627470405057  |
| C  | -4.74208728792121 | 1.55457075693400  | 1.67720053515410  |
| H  | -4.35884840058013 | 2.46683776598157  | 2.13532568530603  |
| H  | -5.82475110752205 | 1.63464175185137  | 1.56742680329284  |
| H  | -4.50410640899521 | 0.71751708897969  | 2.33339989447553  |
| C  | -4.56132143341437 | 2.67266921997873  | -0.96524308414794 |
| H  | -4.17676717865589 | 2.55731288058945  | -1.97840293574820 |
| H  | -5.65359183161253 | 2.68960846985910  | -0.98814195426394 |
| H  | -4.18974360177283 | 3.61652574934436  | -0.56685889803047 |
| C  | -4.72976748610551 | -0.17719029925108 | -0.62742790275635 |
| H  | -5.81263456960749 | -0.05457665506695 | -0.68102575879876 |
| H  | -4.33908316435613 | -0.36050953553834 | -1.62869449143664 |
| H  | -4.49196572187764 | -1.03918694865681 | -0.00434330795627 |
| Si | -1.66008058028155 | 1.01390606422821  | 0.30117256170483  |
| H  | -1.56520160251968 | 1.15424881112306  | -1.21510179360128 |
| H  | -1.57748595859202 | 2.51242950637532  | 0.57630228275594  |

**1<sup>Si</sup>b ((NH<sub>2</sub>)<sub>3</sub>P=SiH<sub>2</sub>)** E = -798.798960298222 au

ZPE = 0.09609601 au

G = 0.06346256 au

|    |                   |                   |                   |
|----|-------------------|-------------------|-------------------|
| P  | -4.17252916264605 | 1.34441453030106  | 0.07221777924965  |
| Si | -1.95193880539796 | 0.96762694981009  | 0.46306556052486  |
| H  | -1.78320108272829 | 0.93344278032037  | -1.04863329057276 |
| H  | -1.77515961105997 | 2.47753229111089  | 0.58747170398368  |
| N  | -4.93421928301863 | 1.53360484272020  | 1.54024710570670  |
| H  | -5.93692622491366 | 1.49343861601284  | 1.63601019815476  |
| H  | -4.40930172090646 | 1.34202926984616  | 2.37720569642340  |
| N  | -5.10191855862932 | 0.13084961342281  | -0.65575756105805 |
| H  | -5.09152635780903 | -0.74580934929703 | -0.15110200053010 |
| H  | -4.88104858643415 | -0.01648317847151 | -1.63214882260250 |
| N  | -4.55471142958625 | 2.57970995742299  | -0.98313298837172 |

|   |                   |                  |                   |
|---|-------------------|------------------|-------------------|
| H | -5.52452501465517 | 2.83361759037821 | -1.11916827881766 |
| H | -3.92658835221494 | 3.36838051642287 | -0.97114960209027 |

**1<sup>Si</sup>c (Tms<sub>3</sub>P=SiH<sub>2</sub>)** E = -1857.006729478627 au

ZPE = 0.35340856 au

G = 0.30110941 au

|    |                   |                   |                   |
|----|-------------------|-------------------|-------------------|
| P  | 0.08865737771938  | 0.26875111684144  | -0.05557661135467 |
| Si | -0.03936826523921 | 2.52760075329578  | -0.28928862306300 |
| Si | -1.54654721954703 | -0.42473843325519 | 1.35792568508218  |
| Si | -0.22382043414665 | -0.70475803562882 | -2.08370924816670 |
| C  | 0.71077417551636  | 3.29665240574111  | 1.24127168962093  |
| H  | 0.78282551965857  | 4.38027143615351  | 1.11218934188305  |
| H  | 0.11587728084607  | 3.10255320639205  | 2.13409873292431  |
| H  | 1.71245525714644  | 2.90042878820991  | 1.41217665061450  |
| C  | 0.98422329019223  | 2.98364812948307  | -1.79318035257612 |
| H  | 0.54310264570419  | 2.62165455566386  | -2.72277560957440 |
| H  | 1.06458204139160  | 4.07176068152961  | -1.86508817899828 |
| H  | 1.99347549048735  | 2.57741581140031  | -1.70808117270031 |
| C  | -1.81837773173128 | 3.09624206059366  | -0.51278357219687 |
| H  | -1.84403172692150 | 4.17953766922179  | -0.66220263373351 |
| H  | -2.29062589632435 | 2.62875545770742  | -1.37783766489118 |
| H  | -2.42570860450202 | 2.87289195274543  | 0.36590807554610  |
| C  | -1.60283098147669 | 0.14357114795843  | -3.03627871293485 |
| H  | -1.36299482470262 | 1.18535535700865  | -3.25386492425489 |
| H  | -1.75604517088779 | -0.36552778378473 | -3.99201994335882 |
| H  | -2.54741633053498 | 0.11999304172957  | -2.49095635685358 |
| C  | 1.40288647138472  | -0.56803492629716 | -2.99993978757286 |
| H  | 1.33692055179800  | -1.09298579295985 | -3.95699666232559 |
| H  | 1.67759798373913  | 0.46755564284623  | -3.20069496169949 |
| H  | 2.20614819571315  | -1.02315326880984 | -2.41733086747524 |
| C  | -0.63583430467524 | -2.51139105789610 | -1.79911470810752 |
| H  | -1.61588157474662 | -2.64998092296505 | -1.34076629206851 |
| H  | -0.63951750608731 | -3.03995529133786 | -2.75639666926026 |
| H  | 0.11497937763583  | -2.97886373694496 | -1.15978311204715 |
| C  | -1.56772413277576 | 0.74832911675495  | 2.82007862731383  |
| H  | -1.92071137630768 | 1.74423714633897  | 2.54916606984838  |
| H  | -2.23870310654376 | 0.35720806091954  | 3.59014607205698  |
| H  | -0.57246613452723 | 0.84277083021106  | 3.25681916845582  |
| C  | -3.21927725146293 | -0.41820555297732 | 0.50223622223743  |
| H  | -3.25937785073886 | -1.13866889851894 | -0.31625251080545 |
| H  | -3.99977156440200 | -0.68963580245794 | 1.21885022358341  |
| H  | -3.46478030152102 | 0.56553265087453  | 0.09973899131682  |
| C  | -1.09520304229691 | -2.14796073179606 | 1.93160730696300  |

|    |                   |                   |                  |
|----|-------------------|-------------------|------------------|
| H  | -1.81964846571975 | -2.49177513498945 | 2.67557846849359 |
| H  | -1.08691360370740 | -2.86542472837493 | 1.11099396952320 |
| H  | -0.10459569138766 | -2.15755737933586 | 2.38903376837415 |
| Si | 2.15932372004215  | -0.54276826250297 | 0.76065055539471 |
| H  | 1.88859218761213  | 0.15510869411452  | 2.09071159901594 |
| H  | 2.86690181632698  | 0.65594072709759  | 0.13547655777098 |

**1<sup>N</sup>a (Me<sub>3</sub>P=NH)** E = -515.701004908343 au

ZPE = 0.12718839 au

G = 0.09630599 au

|   |                   |                   |                   |
|---|-------------------|-------------------|-------------------|
| P | -3.83875667932864 | 1.34127367976327  | -0.02366978126071 |
| N | -2.29912766556626 | 1.11479265285512  | -0.12633064734217 |
| H | -1.69098696804624 | 1.84772164350300  | 0.21389653266511  |
| C | -4.56992691742749 | 1.54023676304060  | 1.64351464307756  |
| H | -4.17570596974730 | 2.44917740699155  | 2.10154637702120  |
| H | -5.65941434054023 | 1.60489907513779  | 1.61215210441948  |
| H | -4.27466280543243 | 0.69065263482740  | 2.25998487534436  |
| C | -4.56380339817903 | 2.75123113329536  | -0.93932470182641 |
| H | -4.27861928074602 | 2.67196768935176  | -1.98884840047694 |
| H | -5.65246586346107 | 2.78019934393161  | -0.86008656719771 |
| H | -4.15643619979722 | 3.68284626691997  | -0.54246837346293 |
| C | -4.65613072821969 | -0.11921028050704 | -0.70983474238143 |
| H | -5.74185313297034 | -0.02651730807659 | -0.66838133720430 |
| H | -4.33922509184526 | -0.24528597333320 | -1.74483367460542 |
| H | -4.34211495869263 | -0.99609672770063 | -0.14403630676970 |

**1<sup>N</sup>b ((NH<sub>2</sub>)<sub>3</sub>P=NH)** E = -563.862089817063 au

ZPE = 0.09632658 au

G = 0.06671285 au

|   |                   |                   |                   |
|---|-------------------|-------------------|-------------------|
| P | -4.05916442707731 | 1.44258132375646  | 0.03844243954254  |
| N | -2.52748798276287 | 1.36188281478643  | 0.23970401446222  |
| H | -1.95697596272281 | 1.22768739672273  | -0.58266868596519 |
| N | -4.69454312464153 | 1.57313766014660  | 1.57304256834403  |
| H | -5.68894134934957 | 1.47169705005311  | 1.69538319301208  |
| H | -4.14116942528257 | 1.13967241167563  | 2.29518943522281  |
| N | -4.91244360713354 | 2.69749344050702  | -0.70047496209176 |
| H | -4.76104307857426 | 2.77294397410308  | -1.69696347699080 |
| H | -4.78298403942315 | 3.59085243390606  | -0.24523869686541 |
| N | -4.68871212060493 | 0.20225827440044  | -0.90221740462072 |
| H | -5.68446062470098 | 0.15683215817688  | -1.06094888142805 |
| H | -4.26160601772626 | -0.70142799823456 | -0.77279485262177 |

**1<sup>N</sup>c (Tms<sub>3</sub>P=NH)** E = -1622.013493244690 au

ZPE = 0.35082538 au

G = 0.29950894 au

|    |                   |                   |                   |
|----|-------------------|-------------------|-------------------|
| P  | 0.10531035714693  | 0.28716977987980  | 0.00173669705317  |
| Si | -0.07971409726829 | 2.55832554711643  | -0.28982428911324 |
| Si | -1.55547466154425 | -0.39542215209706 | 1.39721311419776  |
| Si | -0.20790124640059 | -0.69454756362702 | -2.04699243903034 |
| C  | 0.64046607797778  | 3.32165035702410  | 1.26393038481725  |
| H  | 0.85090220991573  | 4.38354055242066  | 1.11270450314723  |
| H  | -0.03843329376633 | 3.22794440156258  | 2.11233427192505  |
| H  | 1.57128390668022  | 2.81711719851498  | 1.52990766592732  |
| C  | 0.98184607812929  | 3.04076945641959  | -1.76704052484007 |
| H  | 0.57562989400915  | 2.66322219011600  | -2.70674626171244 |
| H  | 1.04464278577677  | 4.12960607285001  | -1.84588156030662 |
| H  | 1.99919453849377  | 2.65837531402464  | -1.66065929457478 |
| C  | -1.85481740886523 | 3.12253845928112  | -0.56446594877949 |
| H  | -1.88002362288640 | 4.20052031343829  | -0.74810276023205 |
| H  | -2.31331216115519 | 2.62971504922454  | -1.42319491067400 |
| H  | -2.47630551058953 | 2.92443413969287  | 0.31054389814183  |
| C  | -1.55291402510143 | 0.14780872073621  | -3.05974509067322 |
| H  | -1.29770555244566 | 1.18323435204035  | -3.29066022113676 |
| H  | -1.69015035580387 | -0.37740168082594 | -4.00930048008227 |
| H  | -2.51219154657320 | 0.14493560723242  | -2.53917362511730 |
| C  | 1.45608872787087  | -0.57579652256590 | -2.90911844739828 |
| H  | 1.44137613535750  | -1.13284939143581 | -3.84969853832728 |
| H  | 1.73094381471554  | 0.45583327819613  | -3.13281406392016 |
| H  | 2.23622732255688  | -1.00486874866403 | -2.27677981685354 |
| C  | -0.62872204234993 | -2.50636868812641 | -1.78140871503097 |
| H  | -1.63386540631423 | -2.64165014995921 | -1.37883093369859 |
| H  | -0.57469493691090 | -3.04975282949384 | -2.72878402328952 |
| H  | 0.07997848135604  | -2.96512280461082 | -1.08949042500732 |
| C  | -1.56198680832707 | 0.75323190131496  | 2.88008060076957  |
| H  | -1.92058842355616 | 1.75226980873063  | 2.62742658337372  |
| H  | -2.21417914802894 | 0.35352565694488  | 3.66150060545229  |
| H  | -0.55528094567948 | 0.84263649138941  | 3.29152066044240  |
| C  | -3.21666274884148 | -0.34805914565394 | 0.51673060337808  |
| H  | -3.25721482510105 | -1.06246317241530 | -0.30736426335934 |
| H  | -4.01431441459183 | -0.60972968703803 | 1.21754179017502  |
| H  | -3.44124928614292 | 0.64206204680657  | 0.11717481715905  |
| C  | -1.09474485023396 | -2.12958627821323 | 1.92641579283408  |
| H  | -1.69701718884444 | -2.44489484826214 | 2.78261211702263  |
| H  | -1.24105012658627 | -2.85280178412631 | 1.12347138825999  |

|   |                   |                   |                  |
|---|-------------------|-------------------|------------------|
| H | -0.04100754158855 | -2.14688512605935 | 2.20978755321785 |
| N | 1.44408338777511  | -0.18872440203242 | 0.77029036124334 |
| H | 2.30105580773568  | 0.07458679024942  | 0.29190346462002 |

**1<sup>P</sup>a (Me<sub>3</sub>P=PH)** E = -801.923709995336 au  
 ZPE = 0.12232384 au  
 G = 0.08997671 au

|   |                   |                   |                   |
|---|-------------------|-------------------|-------------------|
| P | -3.88152924685475 | 1.30594492950742  | -0.04122780135108 |
| P | -1.82594057710859 | 0.99280812986256  | -0.18903657098662 |
| H | -1.59540559788499 | 2.26487252002594  | 0.41471991826341  |
| C | -4.59060125459235 | 1.51746976332188  | 1.63315556254296  |
| H | -4.14334347707228 | 2.39843776523650  | 2.09464170840180  |
| H | -5.67589368359320 | 1.63873087282191  | 1.60174914298912  |
| H | -4.33141866971969 | 0.64825271846934  | 2.23623243719067  |
| C | -4.58811082856819 | 2.72909687809693  | -0.94950901636413 |
| H | -4.34047795513741 | 2.62788970966817  | -2.00545537441259 |
| H | -5.67165449373685 | 2.79356028903279  | -0.82540529734045 |
| H | -4.12804360090855 | 3.64500882561049  | -0.57735385150663 |
| C | -4.74196608454506 | -0.14537410248814 | -0.72250418373611 |
| H | -5.82313963001478 | -0.01146932896253 | -0.67371477592108 |
| H | -4.44114301356919 | -0.28684018574543 | -1.76003272696170 |
| H | -4.46056188669399 | -1.03050078445788 | -0.15297917080759 |

**1<sup>P</sup>b ((NH<sub>2</sub>)<sub>3</sub>P=PH)** E = -850.075506035465 au  
 ZPE = 0.09116971 au  
 G = 0.06035888 au

|   |                   |                   |                   |
|---|-------------------|-------------------|-------------------|
| P | -4.10904293048280 | 1.46228628052240  | 0.08977256125490  |
| P | -2.05511541068429 | 1.42860906029177  | 0.36242745537314  |
| H | -1.89382057686062 | 0.94833325873872  | -0.96731490042414 |
| N | -4.77378175268452 | 1.58820923694854  | 1.61403681762585  |
| H | -5.76747649023039 | 1.73189239781909  | 1.70565306890901  |
| H | -4.35542741146388 | 1.03794398107887  | 2.34619084064282  |
| N | -5.03093023218594 | 2.68866851767327  | -0.64174428740500 |
| H | -4.85221385483409 | 2.75894613069955  | -1.63553116868031 |
| H | -4.88090409041299 | 3.59090776988935  | -0.20763815805764 |
| N | -4.64411293477120 | 0.21840851984242  | -0.88964442537882 |
| H | -5.62912030194973 | 0.14503695793654  | -1.09958819952071 |
| H | -4.16758577343931 | -0.66363117144061 | -0.79616491433910 |

**1<sup>P</sup>c (Tms<sub>3</sub>P=PH)** E = -1908.263664465046 au

ZPE = 0.34647803 au

G = 0.29447518 au

|    |                   |                   |                   |
|----|-------------------|-------------------|-------------------|
| P  | 0.07174675943959  | 0.28390821131164  | -0.03044526311844 |
| Si | -0.05951634041166 | 2.55464857625284  | -0.25341608455594 |
| Si | -1.57619372656193 | -0.39507142471366 | 1.38433042144581  |
| Si | -0.23689028653555 | -0.69555023691042 | -2.07269711294710 |
| C  | 0.62878808057833  | 3.31331011653827  | 1.31013930236511  |
| H  | 0.83068285386905  | 4.37626220421597  | 1.15286328547401  |
| H  | -0.06377541902741 | 3.22025882645870  | 2.14700839816000  |
| H  | 1.55906777708902  | 2.81587905380675  | 1.58982121932713  |
| C  | 1.01887161030501  | 3.00502340650267  | -1.72190677687040 |
| H  | 0.60775168030360  | 2.63434168457808  | -2.66205437027726 |
| H  | 1.10358152973704  | 4.09217372742152  | -1.80159150994139 |
| H  | 2.02522761239253  | 2.59887351329413  | -1.60553678312552 |
| C  | -1.83135301986114 | 3.10923027432014  | -0.55452727668742 |
| H  | -1.85637904143261 | 4.18899542747485  | -0.72733724119101 |
| H  | -2.27068246124477 | 2.62333139630918  | -1.42678000427948 |
| H  | -2.46856065558656 | 2.90070452952154  | 0.30650067890375  |
| C  | -1.61068274184408 | 0.13920618624132  | -3.05055634746683 |
| H  | -1.36852671535428 | 1.17913711122271  | -3.27609932305958 |
| H  | -1.75395346895326 | -0.37828626093051 | -4.00345100757130 |
| H  | -2.56198006654092 | 0.12070411345488  | -2.51664032944350 |
| C  | 1.39969539684430  | -0.55642958533290 | -2.96952942287366 |
| H  | 1.37169579405197  | -1.14038682950880 | -3.89351003617313 |
| H  | 1.64318575254286  | 0.47452268500178  | -3.22851809579067 |
| H  | 2.20033063951459  | -0.94697674255825 | -2.33884651141342 |
| C  | -0.63698304096575 | -2.50161512551593 | -1.76625024589210 |
| H  | -1.63164401661930 | -2.64380923865539 | -1.34140441549762 |
| H  | -0.59557335715081 | -3.05541763307856 | -2.70804074782163 |
| H  | 0.09718839121488  | -2.93801151270784 | -1.08652263267953 |
| C  | -1.61142606640772 | 0.78771446673844  | 2.83695580329597  |
| H  | -1.98467650045124 | 1.77441447648648  | 2.55955428305774  |
| H  | -2.26931588425700 | 0.39071995179440  | 3.61516088457368  |
| H  | -0.61361555401214 | 0.90257520930109  | 3.26263638432813  |
| C  | -3.22796501245726 | -0.38352943708337 | 0.48945254841512  |
| H  | -3.25651984854779 | -1.11454364717683 | -0.32000789753767 |
| H  | -4.02674826859855 | -0.63805893116765 | 1.19173596158380  |
| H  | -3.45642466339194 | 0.59685432669940  | 0.06909693326698  |
| C  | -1.13283038113523 | -2.11715918381824 | 1.96511297172910  |
| H  | -1.84906136998977 | -2.44806415245748 | 2.72267790738746  |
| H  | -1.14328853550874 | -2.83961728232471 | 1.14897841484209  |
| H  | -0.13577811707822 | -2.12892805716695 | 2.40789380528034  |
| P  | 1.89217083577669  | -0.37347654927060 | 0.91551055844001  |
| H  | 2.68786719626623  | 0.40027086543121  | 0.01898991433844  |



**1<sup>o</sup>a (Me<sub>3</sub>P=O)** E = -535.608706204099 au

ZPE = 0.11679156 au

G = 0.08620781 au

|   |                   |                   |                   |
|---|-------------------|-------------------|-------------------|
| P | -3.95361712901369 | 1.39192245202993  | 0.00023252286609  |
| C | -4.68917355190878 | 1.53012369188898  | 1.65634554126930  |
| H | -4.34673304874425 | 2.45583548649188  | 2.12025980733950  |
| H | -5.77979222740546 | 1.52697138497218  | 1.61899689730512  |
| H | -4.34727999445241 | 0.69343003614058  | 2.26675292390903  |
| C | -4.68791345654820 | 2.75644593676693  | -0.94859012963717 |
| H | -4.34885646889098 | 2.68963052060339  | -1.98307192724331 |
| H | -5.77860611013659 | 2.72987286877667  | -0.92451414280200 |
| H | -4.34075458131145 | 3.70330615394218  | -0.53346315613748 |
| C | -4.68773007020097 | -0.11236675111512 | -0.70746076002893 |
| H | -5.77843931235434 | -0.08219987658616 | -0.69049824012595 |
| H | -4.34647728226399 | -0.22179662609350 | -1.73750297826296 |
| H | -4.34252663353962 | -0.97591589277294 | -0.13756084402676 |
| O | -2.47043080322923 | 1.39197469495501  | 0.00007454557553  |

**1<sup>o</sup>b ((NH<sub>2</sub>)<sub>3</sub>P=O)** E = -583.770984400581 au

ZPE = 0.08567916 au

G = 0.05630523 au

|   |                   |                   |                   |
|---|-------------------|-------------------|-------------------|
| P | -4.22916577114712 | 1.44561587001335  | 0.03542614981878  |
| N | -5.11335954542851 | 1.39511430354462  | 1.45003844509810  |
| H | -5.07567451653798 | 2.23965567298456  | 2.00301296707834  |
| H | -4.96606398124779 | 0.56874604243427  | 2.01200955704196  |
| N | -4.90997334585715 | 2.80227586326473  | -0.65612968731580 |
| H | -5.90257510416892 | 2.84392230464881  | -0.82539851548485 |
| H | -4.35366622953800 | 3.25584552037054  | -1.36345428097328 |
| N | -4.71451134910129 | -0.00426879073565 | -0.63376208485683 |
| H | -5.69182456893432 | -0.17338209307302 | -0.81411965730347 |
| H | -4.10068007321806 | -0.37681206552599 | -1.34127379337931 |
| O | -2.76115647482069 | 1.54766730207374  | 0.01410559027634  |

**1<sup>o</sup>c (Tms<sub>3</sub>P=O)** E = -1641.913553195116 au

ZPE = 0.34032943 au

G = 0.28917831 au

|    |                   |                   |                   |
|----|-------------------|-------------------|-------------------|
| P  | 0.09880667660085  | 0.31477121707650  | -0.03221312957428 |
| O  | 1.46600415724303  | -0.04565133338614 | 0.53722226610782  |
| Si | -0.06966356118900 | 2.57958637541619  | -0.32630281340594 |
| Si | -1.56821166947728 | -0.36861400513332 | 1.38003327063654  |
| Si | -0.21041514124284 | -0.70025947807537 | -2.06197152859488 |

|   |                   |                   |                   |
|---|-------------------|-------------------|-------------------|
| C | 0.68734668725722  | 3.33187054020601  | 1.21432613529530  |
| H | 0.85144328290949  | 4.40436637756722  | 1.08116271102442  |
| H | 0.05172008279206  | 3.19282476856038  | 2.08975612105897  |
| H | 1.64897707208740  | 2.85781575550823  | 1.41958975124818  |
| C | 0.95687401427666  | 3.05587076858753  | -1.82600518703703 |
| H | 0.52085420371172  | 2.69021514783772  | -2.75700028973070 |
| H | 1.03498218376846  | 4.14407104722598  | -1.89961812273057 |
| H | 1.96769347287786  | 2.65250053234769  | -1.74158341708576 |
| C | -1.85806856992373 | 3.11960521352028  | -0.55407719166323 |
| H | -1.90197790374193 | 4.19833821061006  | -0.72846604987912 |
| H | -2.32793833701163 | 2.62770438776361  | -1.40731406471842 |
| H | -2.45863744036073 | 2.90638762376441  | 0.33182655394239  |
| C | -1.59197695982195 | 0.11778666152441  | -3.04278806888121 |
| H | -1.35730620958976 | 1.15624461984460  | -3.28155850270848 |
| H | -1.74079859200196 | -0.41202341336150 | -3.98787186599478 |
| H | -2.53998555057364 | 0.10048350160480  | -2.50235035804751 |
| C | 1.44676434210610  | -0.54438104975506 | -2.92302165357977 |
| H | 1.48553110469495  | -1.18165940045376 | -3.81032614528608 |
| H | 1.65108782611887  | 0.48141778729835  | -3.23181834182448 |
| H | 2.24124642451398  | -0.85178845068547 | -2.24014288029572 |
| C | -0.60059659325982 | -2.51704114593597 | -1.78153780023650 |
| H | -1.58671593674840 | -2.66522095803213 | -1.33864587212886 |
| H | -0.57996128485637 | -3.05539796250290 | -2.73318629372174 |
| H | 0.14102240309558  | -2.97348318155369 | -1.12333418805820 |
| C | -1.60666839805822 | 0.78833585774868  | 2.85963183219658  |
| H | -1.97301837549013 | 1.78199851862727  | 2.59665653487433  |
| H | -2.26527743761100 | 0.38591487795335  | 3.63448431672924  |
| H | -0.60961755982741 | 0.89601661880696  | 3.29072964935314  |
| C | -3.24174290987974 | -0.38142397719701 | 0.51857652661299  |
| H | -3.27130127239753 | -1.10803812166893 | -0.29522413254995 |
| H | -4.02560449448197 | -0.65321453483563 | 1.23121752510498  |
| H | -3.49570381059457 | 0.59688204632015  | 0.10717845197502  |
| C | -1.05835437555289 | -2.08477766177222 | 1.93644027854080  |
| H | -1.67284606708772 | -2.41967407325503 | 2.77633825613920  |
| H | -1.15347244922459 | -2.81761220646405 | 1.13437599285688  |
| H | -0.01444547404937 | -2.07214673165223 | 2.25568880403648  |

**1<sup>s</sup>a (Me<sub>3</sub>P=S)** E = -858.202438937130 au

ZPE = 0.11529108 au

G = 0.08379139 au

|   |                   |                  |                  |
|---|-------------------|------------------|------------------|
| P | -3.96973404424943 | 1.39194866810813 | 0.00028804619673 |
| C | -4.72329490483105 | 1.52976703926639 | 1.65365150994852 |
| H | -4.38468531250633 | 2.45536570346497 | 2.11848825140849 |

|   |                   |                   |                   |
|---|-------------------|-------------------|-------------------|
| H | -5.81359887998296 | 1.52471978657609  | 1.59655074236693  |
| H | -4.38473033453774 | 0.69369853716562  | 2.26512193422808  |
| C | -4.72236149385344 | 2.75420472003390  | -0.94692888291318 |
| H | -4.38754769354577 | 2.68815339048380  | -1.98189263222752 |
| H | -5.81275136951796 | 2.71147481913796  | -0.91085669794036 |
| H | -4.37858555906527 | 3.70188911021657  | -0.53325674490460 |
| C | -4.72191554563626 | -0.10979055433742 | -0.70639695284154 |
| H | -5.81235472894970 | -0.06085891431025 | -0.68226150131976 |
| H | -4.38312421104115 | -0.22091933911206 | -1.73612266160003 |
| H | -4.38160884812518 | -0.97418855060077 | -0.13659671679218 |
| S | -2.02203774415773 | 1.39176966390708  | 0.00021236639044  |

**1<sup>s</sup>b ((NH<sub>2</sub>)<sub>3</sub>P=S)** E = -906.355098465257 au  
ZPE = 0.08362675 au  
G = 0.05323983 au

|   |                   |                   |                   |
|---|-------------------|-------------------|-------------------|
| P | -4.26071343493483 | 1.44355981097919  | 0.03188107871868  |
| N | -5.17933301564245 | 1.39064078038231  | 1.43699792536307  |
| H | -5.11355814603364 | 2.23300680098468  | 1.99276534625568  |
| H | -5.00532557581342 | 0.56926777931844  | 2.00072977158169  |
| N | -4.94973234913506 | 2.79832413440861  | -0.65822713225702 |
| H | -5.94620740981162 | 2.82752278011764  | -0.81559526250810 |
| H | -4.39919305237377 | 3.26752187965086  | -1.35903094083580 |
| N | -4.75434119982502 | -0.00629906160847 | -0.63493651001349 |
| H | -5.73720240936550 | -0.16256792795014 | -0.80476260301368 |
| H | -4.14425945148979 | -0.39473645565159 | -1.33630850187739 |
| S | -2.32878491557475 | 1.57813940936843  | 0.02694151858634  |

**1<sup>s</sup>c (Tms<sub>3</sub>P=S)** E = -1964.532356591744 au  
ZPE = 0.33917249 au  
G = 0.28765550 au

|    |                   |                   |                   |
|----|-------------------|-------------------|-------------------|
| P  | 0.06302160847838  | 0.32352238922734  | -0.04671795853112 |
| S  | 1.86309958491303  | -0.16429081088329 | 0.71708240299944  |
| Si | -0.07502349416567 | 2.58952808163802  | -0.31630789786775 |
| Si | -1.58210400979795 | -0.37878027466147 | 1.37480862356724  |
| Si | -0.20934140476541 | -0.69268075364707 | -2.07650570634439 |
| C  | 0.63506997566145  | 3.36106542538788  | 1.23146536051615  |
| H  | 0.79130634236544  | 4.43223320844709  | 1.07815608963246  |
| H  | -0.02268206359508 | 3.23449999381736  | 2.09181462126980  |
| H  | 1.59472935466812  | 2.89899428100812  | 1.46850023393918  |
| C  | 0.98482252008543  | 3.02690532212971  | -1.79964311113968 |
| H  | 0.55145878756891  | 2.67194026011127  | -2.73583350553591 |

|   |                   |                   |                   |
|---|-------------------|-------------------|-------------------|
| H | 1.09430369546117  | 4.11224763821643  | -1.87289812789897 |
| H | 1.98096634953446  | 2.59360846402886  | -1.69465813132372 |
| C | -1.85965119579197 | 3.11831016809050  | -0.58563374442033 |
| H | -1.90180082258014 | 4.19486701996802  | -0.77352432476809 |
| H | -2.31369712646770 | 2.61470440016346  | -1.44022310045370 |
| H | -2.47414199798618 | 2.91558397560211  | 0.29319464356506  |
| C | -1.62395490666169 | 0.09734781388202  | -3.03035408388851 |
| H | -1.40896097991392 | 1.13772971731660  | -3.27959133338134 |
| H | -1.77998963299855 | -0.44018328037981 | -3.96992288887760 |
| H | -2.56122175962873 | 0.06819450865714  | -2.47265150167417 |
| C | 1.41558299543157  | -0.50900962455951 | -2.98215717103660 |
| H | 1.42499642465781  | -1.14819671960413 | -3.86915322905435 |
| H | 1.59553069728482  | 0.51783862751065  | -3.30112138283899 |
| H | 2.23652647184179  | -0.80712894342577 | -2.32785035511295 |
| C | -0.55853287512045 | -2.50559607529677 | -1.74878739188917 |
| H | -1.54826150032250 | -2.66662290468254 | -1.31914066224076 |
| H | -0.50685396206582 | -3.06786180217679 | -2.68507842194404 |
| H | 0.18572945950619  | -2.91933606315538 | -1.06620717893526 |
| C | -1.56562693150467 | 0.78165309064169  | 2.84682376619264  |
| H | -1.93716502930520 | 1.77594890551196  | 2.59470335058074  |
| H | -2.19986454008269 | 0.38131755793774  | 3.64251236190174  |
| H | -0.55283967550283 | 0.88128600151156  | 3.24097460248323  |
| C | -3.25784735219186 | -0.35227205023025 | 0.52113760390281  |
| H | -3.30185166700609 | -1.07139573224528 | -0.29873412736220 |
| H | -4.04104294143722 | -0.62057122888636 | 1.23585164721660  |
| H | -3.49924434715964 | 0.63335179491809  | 0.12059118158267  |
| C | -1.11544090652172 | -2.10764434225683 | 1.91260870045569  |
| H | -1.74247754754399 | -2.42233721852912 | 2.75125192204400  |
| H | -1.23551384649105 | -2.83424895771433 | 1.10877450365825  |
| H | -0.07196419084979 | -2.12592109338895 | 2.23132080101193  |

**2a (SiF<sub>4</sub>)** E = -688.311382894961 au

ZPE = 0.01250444 au

G = -0.01617953 au

|    |                   |                   |                  |
|----|-------------------|-------------------|------------------|
| Si | 1.12779234297591  | 0.37734539763511  | 1.97439471198149 |
| F  | 1.02191724372951  | 1.92653502082133  | 2.18740645747247 |
| F  | 2.24468589890300  | -0.20332214190157 | 2.90864988346270 |
| F  | -0.24777417911370 | -0.28987271035102 | 2.32163517946315 |
| F  | 1.49388249453148  | 0.07872288463864  | 0.47973037790828 |

**2b (Si(CF<sub>3</sub>)<sub>4</sub>)** E = -1638.090475910649 au

ZPE = 0.05659171 au

G = 0.01248369 au

|    |                   |                  |                   |
|----|-------------------|------------------|-------------------|
| Si | -1.06326064765221 | 2.96024429454895 | 1.25846931968960  |
| C  | -2.99800423096455 | 2.96561526590767 | 1.25891265635524  |
| F  | -3.48265832421734 | 2.33563583872770 | 2.34664541358038  |
| F  | -3.48571376529149 | 4.22075895948440 | 1.26047044660810  |
| F  | -3.48354213793558 | 2.33796181195985 | 0.17024974089833  |
| C  | -0.41135384256008 | 3.86456087973650 | -0.32393790452606 |
| F  | -0.80952100643306 | 3.23507674780107 | -1.44627511474271 |
| F  | 0.93495429115284  | 3.90897937433060 | -0.33503347189116 |
| F  | -0.86508044623080 | 5.13136481059733 | -0.38219966498246 |
| C  | -0.42082006330249 | 1.13552851805707 | 1.25890007405413  |
| F  | -0.84797471445787 | 0.46778705194709 | 2.34802726765252  |
| F  | -0.84983441041862 | 0.46630954768102 | 0.17142794395355  |
| F  | 0.92604276085071  | 1.09881274982566 | 1.25778333091618  |
| C  | -0.41167983858176 | 3.86438572469016 | 2.84103875701461  |
| F  | -0.86248638528737 | 5.13230640641014 | 2.89735258964172  |
| F  | -0.81338454153284 | 3.23685557721948 | 3.96321321316690  |
| F  | 0.93469163286252  | 3.90560363107530 | 2.85453678261112  |

**3<sup>c</sup>a** E = -1187.964940156954 au

ZPE = 0.15427384 au

G = 0.11560088 au

|    |                   |                   |                   |
|----|-------------------|-------------------|-------------------|
| C  | -1.88817585208840 | 0.40221925994948  | 1.07392778032346  |
| H  | -2.25150886467896 | 1.42967790344408  | 1.02672715063788  |
| H  | -2.27749722365936 | -0.09558527463934 | 1.96319645219227  |
| Si | 0.06545088169143  | 0.36316828608947  | 1.10073488548006  |
| P  | -2.49953641460911 | -0.45548229422509 | -0.34185566343423 |
| C  | -1.92413300684287 | -2.16046453259579 | -0.37037315193691 |
| H  | -2.35659035596812 | -2.68350435259879 | -1.22403071432442 |
| H  | -0.83690206425368 | -2.16344251495706 | -0.43065907958974 |
| H  | -2.21510349717068 | -2.65750952258824 | 0.55453302005436  |
| C  | -4.31011511008631 | -0.50124054387759 | -0.36683536414071 |
| H  | -4.70217132613180 | 0.51605851669374  | -0.37452408001399 |
| H  | -4.67165168474125 | -1.03202735168405 | -1.24835780305070 |
| H  | -4.67043770718342 | -1.00847528702606 | 0.52861691621808  |
| C  | -1.95932223037707 | 0.35882541078366  | -1.85444837718898 |
| H  | -2.35660494585219 | -0.16608122958299 | -2.72385023214007 |
| H  | -2.30959521602891 | 1.39092107102247  | -1.85803404545175 |
| H  | -0.87008508208530 | 0.36175917156676  | -1.88069321030843 |
| F  | 0.05252820302927  | 1.83600205584234  | 0.30367992228433  |
| F  | 0.91024950193397  | 0.96518366810066  | 2.33081739388511  |
| F  | -0.04758554620854 | -1.13922791868445 | 1.84449211185083  |
| F  | 0.79045181131136  | -0.33890405103317 | -0.18939661134643 |

**3<sup>c</sup>b** E = -2137.770306927036 au

ZPE = 0.19962280 au

G = 0.14792225 au

|    |                    |                   |                   |
|----|--------------------|-------------------|-------------------|
| C  | -2.49612503579728  | -0.52710479245635 | 1.06743204367996  |
| H  | -2.87358866652797  | 0.49713323729719  | 1.09204633090459  |
| H  | -2.83158005778002  | -1.02152504569380 | 1.98150913209932  |
| Si | -3.39469199276341  | -1.42108882860398 | -0.42281306579036 |
| P  | -0.73229760199961  | -0.37598233857652 | 1.24659613080638  |
| C  | -0.42871619182977  | 0.55042204182470  | 2.77130468839274  |
| H  | 0.64207481657126   | 0.67534568875335  | 2.93484988213646  |
| H  | -0.897531107257201 | 0.53220211550006  | 2.70166107661701  |
| H  | -0.86043834257680  | 0.01382335001981  | 3.61659825490420  |
| C  | 0.06194305412683   | 0.53880576954420  | -0.08114905300112 |
| H  | -0.01571667023511  | -0.01661778521317 | -1.01228132021544 |
| H  | -0.42221618806034  | 1.50517607720965  | -0.21190453303780 |
| H  | 1.11114662900006   | 0.68409786050520  | 0.17972335446665  |
| C  | 0.11228248684177   | -1.95300412032951 | 1.42111337316873  |
| H  | 1.15564565704088   | -1.76211619086113 | 1.67591119448151  |
| H  | -0.35621128733535  | -2.54423547158176 | 2.20615630357216  |
| H  | 0.05305035145220   | -2.50875436276156 | 0.48857629926546  |
| C  | -5.37718558138693  | -1.43894480452085 | -0.39311583432353 |
| C  | -3.41357045542315  | 0.35087283509841  | -1.46326867644326 |
| C  | -2.38042368368477  | -2.27398394845209 | -1.91361790523320 |
| C  | -3.33944901640023  | -3.19229836286768 | 0.61449571045138  |
| F  | -3.67898640861779  | -3.04785405142659 | 1.94171044680268  |
| F  | -4.12360137130645  | -4.18059606777932 | 0.14398910849150  |
| F  | -2.06412637259635  | -3.71965900109136 | 0.66447275426368  |
| F  | -5.91299037720008  | -2.10163697311904 | 0.65736190003569  |
| F  | -5.93296662675736  | -0.20451228062248 | -0.36571576949645 |
| F  | -5.83573474516834  | -2.05081370961054 | -1.51582674532786 |
| F  | -4.23824174078631  | 0.40236017865424  | -2.52643465392987 |
| F  | -3.74937484365768  | 1.43448500669234  | -0.68232591622580 |
| F  | -2.16113937073174  | 0.67790652983874  | -1.94389891022800 |
| F  | -2.59722140574073  | -1.74414740049142 | -3.12914834903387 |
| F  | -1.02128793524462  | -2.11095689886158 | -1.67011264169051 |
| F  | -2.56906519816736  | -3.59778247601702 | -2.04314748056303 |

**3<sup>c</sup>c** E = -1236.125801984793 au

ZPE = 0.12348659 au

G = 0.08649081 au

|   |                   |                   |                  |
|---|-------------------|-------------------|------------------|
| C | -2.49917602968998 | -0.35700854079321 | 1.34225227653799 |
|---|-------------------|-------------------|------------------|

|    |                   |                   |                   |
|----|-------------------|-------------------|-------------------|
| H  | -2.83047532920835 | 0.67985885300702  | 1.33377918742509  |
| H  | -2.84393893865021 | -0.86965918753062 | 2.23852613435120  |
| Si | -3.13581136655371 | -1.28302887577139 | -0.26116651463963 |
| P  | -0.74523106120538 | -0.39375505949573 | 1.30739742933220  |
| F  | -3.03679938140320 | 0.19982948500034  | -1.06692915948558 |
| F  | -2.02968675581508 | -1.89580305956157 | -1.29044461836425 |
| F  | -4.70348798279079 | -1.43219696794724 | -0.55874919827979 |
| F  | -3.07694498575819 | -2.71836086334593 | 0.62824320589508  |
| N  | 0.20052712008947  | 0.28708987250120  | 2.48108612606554  |
| H  | 0.22400414985416  | -0.16137008183103 | 3.38390627157338  |
| H  | 0.24408573746520  | 1.29385864500009  | 2.51956010429825  |
| N  | -0.33114680730758 | 0.49934691287777  | -0.00364152990537 |
| H  | -1.01211113929769 | 0.52204781277613  | -0.75842194074205 |
| H  | 0.63205287561727  | 0.55337813450018  | -0.29495435903575 |
| N  | -0.35668005495237 | -1.98027086598996 | 1.45146002939002  |
| H  | 0.60356353644634  | -2.27458368351284 | 1.36833244447538  |
| H  | -1.04277583683984 | -2.64112443988314 | 1.09656233110822  |

**3<sup>c</sup>d**      E = -2185.926637413158 au  
                  ZPE = 0.16755731 au  
                  G = 0.11669995 au

|    |                   |                   |                   |
|----|-------------------|-------------------|-------------------|
| P  | -3.21035600788576 | -0.37628316547673 | -0.43708153666623 |
| Si | -0.49642424756185 | 0.51151207981386  | 1.09460984129199  |
| N  | -4.79743268357869 | 0.06342299155071  | -0.37324084244269 |
| H  | -5.40219404107666 | -0.19804505624577 | -1.13810191316282 |
| H  | -5.25801205465827 | 0.06552531301280  | 0.52422870095156  |
| N  | -2.81309505558181 | 0.12089801131822  | -1.95000119784000 |
| H  | -1.87261237057418 | -0.12251423965389 | -2.23761748773501 |
| H  | -3.01887596064599 | 1.08651528885675  | -2.17068135837692 |
| N  | -2.90556011699033 | -1.97460014026295 | -0.37145330482789 |
| H  | -2.18672118056098 | -2.32015006919075 | 0.25342153794807  |
| H  | -3.10368893571252 | -2.56098923470191 | -1.16638590200911 |
| C  | -0.43381706976440 | -1.23454842831096 | 2.19248641815309  |
| C  | 0.75394930208716  | -0.29165476129953 | -0.23933444234497 |
| C  | 0.18597666776813  | 1.54803183151795  | 2.63571317417786  |
| C  | -0.55508698040699 | 2.23092824813991  | -0.04781197688175 |
| F  | -1.62211865094185 | 3.04498691155006  | 0.25419292881697  |
| F  | 0.53471419601762  | 3.01845044462323  | 0.02996908711308  |
| F  | -0.72386424360809 | 1.96804625305172  | -1.39457642099699 |
| F  | -0.34967875239296 | 2.79019881867871  | 2.71402450480675  |
| F  | -0.04545567400387 | 0.97448658448530  | 3.83747238578602  |
| F  | 1.52942989173801  | 1.70333836757603  | 2.53157377600303  |
| F  | 0.72127823165899  | -1.51885399575430 | 2.81396578682188  |
| F  | -1.40614873697136 | -1.30433806974802 | 3.15527990988037  |

|   |                   |                   |                   |
|---|-------------------|-------------------|-------------------|
| F | -0.70029438367021 | -2.35484350302727 | 1.39324578449946  |
| F | 0.01862826287112  | -0.86364718142706 | -1.27091462233458 |
| F | 1.53622025855857  | -1.27729317340959 | 0.23054726362788  |
| F | 1.57769136339404  | 0.59531999149837  | -0.82283294086005 |
| C | -2.43878692687433 | 0.35748903953926  | 0.97519005720913  |
| H | -2.82847670508801 | 1.37419549544376  | 1.03064647430591  |
| H | -2.79288592554434 | -0.19096271214797 | 1.85001323508595  |

**3<sup>c</sup>e**      E = -2294.303688982847 au

          ZPE = 0.37867202 au

          G = 0.32208281 au

|    |                   |                   |                   |
|----|-------------------|-------------------|-------------------|
| P  | -2.56138351335546 | -0.48299205981433 | -0.43756189218492 |
| Si | -0.24777443026130 | 0.54571721983160  | 1.54066518296111  |
| Si | -4.85277392452691 | -0.51797896836861 | -0.35688076023101 |
| Si | -1.74031274599323 | -2.63716123766060 | -0.28048150818294 |
| Si | -1.84126408702853 | 0.78575795862520  | -2.23564068375397 |
| F  | -0.65290539482019 | 0.80569128434971  | 3.13177958206312  |
| F  | 0.59707747862929  | -0.79404737264716 | 1.91544048986503  |
| F  | 0.47012351486554  | 1.99302291492335  | 1.42619102614277  |
| F  | 0.13080586957938  | 0.27240374219000  | -0.11755435331928 |
| C  | -5.33391700868573 | -1.46346528722685 | 1.18837744535564  |
| H  | -4.84716154977874 | -1.07094582388441 | 2.08181998571465  |
| H  | -6.41427846279446 | -1.37972294647706 | 1.33607704716276  |
| H  | -5.09435627501115 | -2.52458468591643 | 1.10675427354767  |
| C  | -5.38994586254995 | 1.27279059597863  | -0.21147549289701 |
| H  | -5.08397875638410 | 1.86942681390813  | -1.07175938472835 |
| H  | -6.48066113227124 | 1.31950700442504  | -0.14878788318227 |
| H  | -4.98608167048823 | 1.74139017226659  | 0.68710443861622  |
| C  | -5.63708840691851 | -1.32700219716480 | -1.85389191012517 |
| H  | -6.71748464327308 | -1.37799271653653 | -1.69008986489175 |
| H  | -5.46914443993250 | -0.76298176359456 | -2.76999196082868 |
| H  | -5.28096814803492 | -2.34476122311091 | -2.00929753381349 |
| C  | -1.88798681562154 | -3.07690115987995 | 1.53002879566492  |
| H  | -1.61323075251166 | -4.12821103727872 | 1.65654042994968  |
| H  | -1.20089049459321 | -2.48047175998139 | 2.13100902974571  |
| H  | -2.89800785939036 | -2.94914892868856 | 1.91922035029591  |
| C  | 0.02387262249137  | -2.75242033042999 | -0.86060471261689 |
| H  | 0.12081593820499  | -2.57807097732393 | -1.93161622592765 |
| H  | 0.65467784929767  | -2.04163082118981 | -0.33038288887041 |
| H  | 0.38147906287434  | -3.76508243652913 | -0.64973505479822 |
| C  | -2.85248752617744 | -3.71787137105634 | -1.34085031034207 |
| H  | -3.86462998639079 | -3.79534397960313 | -0.94261638281390 |
| H  | -2.91456484443973 | -3.36169140761694 | -2.37106126263859 |
| H  | -2.43316800985036 | -4.72741050641837 | -1.36936680640453 |



|   |                   |                   |                   |
|---|-------------------|-------------------|-------------------|
| C | -0.33730257885409 | 0.05478324644411  | -3.06068528431389 |
| H | -0.05141461622755 | 0.71229370322684  | -3.88742782126979 |
| H | 0.49749011563422  | -0.02221295915346 | -2.36906922573830 |
| H | -0.54853722043172 | -0.92811516610707 | -3.48575021329632 |
| C | -3.23161123770531 | 0.78837809733987  | -3.50405054668698 |
| H | -4.15353342506192 | 1.23840034741876  | -3.13570250941261 |
| H | -2.90162190960961 | 1.38054518477137  | -4.36283780229035 |
| H | -3.45957063911922 | -0.21379426734645 | -3.87147840785941 |
| C | -1.58776759822604 | 2.51466575873299  | -1.57840148801010 |
| H | -0.76805711381699 | 2.55638464780411  | -0.86244926159875 |
| H | -1.34582474469260 | 3.17400242745928  | -2.41731671033823 |
| H | -2.48989256946871 | 2.90711042022359  | -1.10475665016892 |
| C | -2.11387688234430 | 0.37641399121503  | 1.11765505380781  |
| H | -2.51804148839302 | 1.39060073379586  | 1.07059863356047  |
| H | -2.62116445654164 | -0.11964101392441 | 1.94423191908139  |

3<sup>f</sup> E = -3244.107317559104 au  
 ZPE = 0.42423690 au  
 G = 0.35517925 au

|    |                   |                   |                   |
|----|-------------------|-------------------|-------------------|
| P  | -2.38577402179485 | -0.61706289943807 | -0.46833759980555 |
| Si | 0.07372159348838  | 0.78395853222876  | 1.50815677819562  |
| Si | -4.58834479466900 | 0.00285154947814  | -0.18273409497461 |
| Si | -2.29291312619350 | -2.93824932821939 | -0.51709430852078 |
| Si | -1.68180635068478 | 0.15417268402123  | -2.53388686987007 |
| C  | -5.22131701784438 | -0.98450811419273 | 1.27859580229998  |
| H  | -4.58660467751197 | -0.85302449841900 | 2.15641034949561  |
| H  | -6.22170873863532 | -0.63015262335296 | 1.54212420984784  |
| H  | -5.29454446610480 | -2.05126233361889 | 1.06673017335629  |
| C  | -4.59954830348872 | 1.83074933402523  | 0.20228508901177  |
| H  | -4.11008713705055 | 2.42256227653395  | -0.57018123318828 |
| H  | -5.64229660143196 | 2.15593492415786  | 0.26759419354064  |
| H  | -4.11883401727173 | 2.06947643192044  | 1.15024928820867  |
| C  | -5.59488059721686 | -0.33624301175976 | -1.72548057330038 |
| H  | -6.63922895347709 | -0.09088356499740 | -1.51187097536075 |
| H  | -5.28007595481724 | 0.28930026759427  | -2.56148537709787 |
| H  | -5.55948105593697 | -1.37773454606725 | -2.04073482176836 |
| C  | -2.28431782867460 | -3.52770801245645 | 1.25319488717558  |
| H  | -3.12376034883314 | -3.13330939916884 | 1.82728742609783  |
| H  | -2.37513217605761 | -4.61808440583094 | 1.24416949582992  |
| H  | -1.36107415702208 | -3.27431092128985 | 1.77083406659584  |
| C  | -0.80097224865105 | -3.54657549262746 | -1.46404478117423 |
| H  | -0.80370234717183 | -3.23302867764639 | -2.50723285577577 |
| H  | 0.13363276927698  | -3.23142393221017 | -1.00712517617679 |
| H  | -0.82759210060776 | -4.64069639210033 | -1.45327568474853 |

|   |                   |                   |                   |
|---|-------------------|-------------------|-------------------|
| C | -3.85191968375615 | -3.54189380137074 | -1.37171305404602 |
| H | -4.75804433319785 | -3.28125457902465 | -0.82546318132552 |
| H | -3.94764906437479 | -3.17967186549278 | -2.39444818012121 |
| H | -3.80239951026970 | -4.63394087088089 | -1.41595543120929 |
| C | 0.16915208767531  | 0.02825511682468  | -2.66310534666023 |
| H | 0.43547727903007  | 0.00761336131523  | -3.72411799889203 |
| H | 0.66364738749449  | 0.88580789591640  | -2.21396585636814 |
| H | 0.56742747028831  | -0.87385849493969 | -2.19999273860500 |
| C | -2.51456278870703 | -1.03218090359418 | -3.73174736138357 |
| H | -3.59914722872871 | -1.04463432080324 | -3.63004796008757 |
| H | -2.28869969554633 | -0.67983686636514 | -4.74261976708370 |
| H | -2.14908009209194 | -2.05445644606974 | -3.65704135081752 |
| C | -2.32937460669688 | 1.86684518305898  | -2.89870801133273 |
| H | -2.06238388512041 | 2.10314671391766  | -3.93354926408881 |
| H | -3.41631307146325 | 1.91921696018883  | -2.82492621522969 |
| H | -1.89719587780169 | 2.62821332514982  | -2.25528210274013 |
| C | 0.17740768670439  | 1.17969278383787  | 3.44436575159837  |
| C | -0.74658657196051 | 2.61744534257109  | 1.13706540068938  |
| C | 0.85230066957632  | -1.07779826070184 | 1.78140621262575  |
| C | 1.67780650521340  | 1.28217741543204  | 0.42513131898535  |
| F | 0.04139857485148  | 3.70554280082303  | 1.19928639998764  |
| F | -1.81753722666515 | 2.89173235565953  | 1.95214420985369  |
| F | -1.29512607504042 | 2.62911329033441  | -0.14101129989250 |
| F | -1.01303800609167 | 0.84809126701304  | 4.03732275696605  |
| F | 0.38981385723097  | 2.48321920974520  | 3.72755552454452  |
| F | 1.13138251035901  | 0.49232655164458  | 4.10839298740346  |
| F | 0.18379805501132  | -1.78750554136980 | 2.74988115552577  |
| F | 0.65793687168241  | -1.83210419921240 | 0.62855121949619  |
| F | 2.15764662570886  | -1.20470385255111 | 2.07757917958463  |
| F | 1.45611027966279  | 2.21190838730322  | -0.54331537281503 |
| F | 2.60054517850299  | 1.81996401096823  | 1.26266093721585  |
| F | 2.29194983508424  | 0.25323934490025  | -0.21039987218174 |
| C | -1.65774640755644 | -0.02149998775851 | 1.11903884107344  |
| H | -2.36624510485988 | 0.71222467511727  | 1.49750033364606  |
| H | -1.72964833576401 | -0.87949388815047 | 1.78618846779079  |

**3<sup>Si</sup>a**

E = au

ZPE = 0.14397456 au

G = 0.10332560 au

|    |                   |                   |                   |
|----|-------------------|-------------------|-------------------|
| Si | -1.92959967927340 | 0.61342040154887  | 1.52135965847564  |
| H  | -2.65505210113484 | 1.89722157370337  | 1.32389333580532  |
| H  | -2.68717795958802 | -0.17812307130883 | 2.52796196166288  |
| Si | 0.42493013028651  | 0.35718889661480  | 1.12197913469499  |
| P  | -2.62126866949911 | -0.47287802580048 | -0.37438582385786 |

|   |                   |                   |                   |
|---|-------------------|-------------------|-------------------|
| C | -1.96787299582472 | -2.16251422327940 | -0.39884816546767 |
| H | -2.28611179859126 | -2.67721578730937 | -1.30635629986221 |
| H | -0.88045465823510 | -2.11826129849348 | -0.35634351120505 |
| H | -2.33094968692648 | -2.70457366661682 | 0.47432207295036  |
| C | -4.42351370310266 | -0.61250966779761 | -0.57929367542310 |
| H | -4.86826234076538 | 0.38185562432528  | -0.60978535403018 |
| H | -4.66083076909430 | -1.14209962268993 | -1.50371742846886 |
| H | -4.84467936063827 | -1.15797323697252 | 0.26498473668376  |
| C | -1.99340545148444 | 0.37822215750465  | -1.84566000231459 |
| H | -2.27586392096145 | -0.16755179015414 | -2.74689161128045 |
| H | -2.40670653977556 | 1.38603467308558  | -1.88432876946636 |
| H | -0.90882761984580 | 0.44971121613552  | -1.77549358851887 |
| F | 0.23796775677304  | 1.76263381392424  | 0.22930903242421  |
| F | 1.67491892777844  | 0.91715171805152  | 1.95447670074519  |
| F | 0.27496295939096  | -1.02772964659970 | 2.04240214120110  |
| F | 0.79946175051184  | -0.50013956787150 | -0.21591724474822 |

**3<sup>Si</sup>b**      E = -2388.779364013978 au

            ZPE = 0.18933028 au

            G = 0.13600848 au

|    |                   |                   |                   |
|----|-------------------|-------------------|-------------------|
| Si | -2.77220039095898 | -0.31799605897472 | 1.41860578532804  |
| H  | -2.99530043081991 | 1.14097474534212  | 1.54712496333401  |
| H  | -2.93055199314074 | -0.92674655691923 | 2.75953225741626  |
| Si | -3.67953481137688 | -1.49245603565166 | -0.50723549858953 |
| P  | -0.47514379048096 | -0.30903951563219 | 1.33424482123603  |
| C  | 0.16372988584623  | 0.28988896099322  | 2.92793019859382  |
| H  | 1.25437728967584  | 0.31946853277739  | 2.91103734378472  |
| H  | -0.22015951963456 | 1.29109828710759  | 3.12291214467301  |
| H  | -0.16742964238664 | -0.37384817327121 | 3.72611953248669  |
| C  | 0.20880981453985  | 0.78646757376666  | 0.06548018144680  |
| H  | -0.06484914090535 | 0.41646017318263  | -0.91969483196214 |
| H  | -0.20105641586915 | 1.78847718373376  | 0.18369828342578  |
| H  | 1.29483709983572  | 0.81885462607663  | 0.16463142283742  |
| C  | 0.25417671997635  | -1.94500336183120 | 1.07331765758358  |
| H  | 1.34135761072710  | -1.86445437730321 | 1.12043672317943  |
| H  | -0.09934695234620 | -2.63473135539812 | 1.83741359597897  |
| H  | -0.04014777448072 | -2.33115494976106 | 0.09952630737455  |
| C  | -5.60629808715680 | -1.68070602065557 | -0.92955810564645 |
| C  | -3.60730384831074 | 0.30209924373685  | -1.47945117906080 |
| C  | -2.37514598930646 | -2.28507467952278 | -1.77598628589616 |
| C  | -3.71179261551736 | -3.14469973720779 | 0.67852683350598  |
| F  | -4.64653661684215 | -3.01332028279779 | 1.66332726365262  |
| F  | -3.91533570375449 | -4.34894743834612 | 0.11720654912922  |
| F  | -2.50426016938246 | -3.25675464897417 | 1.36053140257259  |

|   |                   |                   |                   |
|---|-------------------|-------------------|-------------------|
| F | -6.36278301904076 | -1.01159550614616 | -0.01582413955674 |
| F | -5.93194984121636 | -1.18144229259390 | -2.14216697672979 |
| F | -6.03889407434886 | -2.95946166055920 | -0.91991580504084 |
| F | -3.64600605655698 | 0.30006897974494  | -2.82505239155917 |
| F | -4.59836289767170 | 1.13311259486226  | -1.05804500634816 |
| F | -2.43629223639586 | 0.98113020842319  | -1.15483440416630 |
| F | -2.94049251160783 | -2.55057073712372 | -2.96935884579381 |
| F | -1.32441232642279 | -1.43569891076060 | -2.02498027297575 |
| F | -1.79403684466904 | -3.43538303031672 | -1.35875239421390 |

**3<sup>Si</sup>c**      E = -1487.116714117082 au  
                   ZPE = 0.11257774 au  
                   G = 0.07456433 au

|    |                   |                   |                   |
|----|-------------------|-------------------|-------------------|
| Si | -2.91066306636197 | -0.18704671914504 | 1.52373955901536  |
| H  | -3.06752447813913 | 1.28381922139746  | 1.63750029581695  |
| H  | -3.14249840299139 | -0.79899777823459 | 2.85522696683072  |
| Si | -3.29340612913164 | -1.39242933337110 | -0.51232481540426 |
| P  | -0.63498810671873 | -0.36682107374529 | 1.37490141430658  |
| F  | -3.46797255792518 | 0.10690120795120  | -1.22432022277471 |
| F  | -1.97570820410955 | -1.71580223721099 | -1.41549299428892 |
| F  | -4.68248888019543 | -1.97280695319579 | -1.05510936161721 |
| F  | -2.97566211787669 | -2.75100663444501 | 0.45574445038981  |
| N  | 0.47927424126827  | 0.24218522160373  | 2.45997955055961  |
| H  | 0.49155471537472  | -0.19981427848566 | 3.36791249057304  |
| H  | 0.53627503242616  | 1.24889708590863  | 2.51753678557114  |
| N  | -0.21646170996490 | 0.48982178779226  | 0.02330506384672  |
| H  | -0.85326120734897 | 0.43059891696164  | -0.76261538690365 |
| H  | 0.75470853065422  | 0.50871223622607  | -0.25632748350686 |
| N  | -0.33081644411345 | -1.98161129686302 | 1.47612979982870  |
| H  | 0.60887391370458  | -2.32537409238449 | 1.33947443561101  |
| H  | -1.05926737855084 | -2.59097719076000 | 1.11153767214590  |

**3<sup>Si</sup>d**      E = -2436.927588689485 au  
                   ZPE = 0.15708124 au  
                   G = 0.10483331 au

|    |                   |                   |                   |
|----|-------------------|-------------------|-------------------|
| P  | -3.35140643233820 | -0.54371157609808 | -0.66987251326297 |
| Si | -0.34615732462962 | 0.63323935609721  | 1.26942869499612  |
| N  | -5.00488098188537 | -0.55948549910067 | -0.75100095242843 |
| H  | -5.45161500868234 | -0.95298870383269 | -1.56845848092977 |
| H  | -5.52103610865369 | -0.70819255357211 | 0.10270568812317  |
| N  | -2.99026362417365 | 0.12358983653447  | -2.14425382517471 |
| H  | -1.99635801714378 | 0.20924004204558  | -2.32293862121798 |

|    |                   |                   |                   |
|----|-------------------|-------------------|-------------------|
| H  | -3.46841756711628 | 0.99018688947022  | -2.35276196464398 |
| N  | -2.57316105761472 | -1.98011078125098 | -0.70918256526188 |
| H  | -2.02767651140763 | -2.29210644516761 | 0.08127995793881  |
| H  | -2.44078036317785 | -2.48588570464777 | -1.57089773205411 |
| C  | -0.36200949711820 | -1.07912088925732 | 2.39143835833876  |
| C  | 0.59872105041068  | -0.25108866903298 | -0.23737067957880 |
| C  | 0.74562018085464  | 1.55702910380761  | 2.64326844074834  |
| C  | -0.52484613427655 | 2.36152588839962  | 0.19616338398955  |
| F  | -0.94533929430099 | 3.38612153036334  | 0.98583419374039  |
| F  | 0.55563662982891  | 2.80278798379008  | -0.47607766356221 |
| F  | -1.52427748216360 | 2.24387203134308  | -0.76657012351918 |
| F  | 1.47535466536921  | 2.58036031073319  | 2.15190031457536  |
| F  | -0.05109069324571 | 2.08028559438115  | 3.61577266057465  |
| F  | 1.62078553110694  | 0.73444226320026  | 3.26296739864644  |
| F  | 0.77491744478601  | -1.78102188570732 | 2.52625894816781  |
| F  | -0.82063870599820 | -0.83281811198632 | 3.64674534721152  |
| F  | -1.28897753515833 | -1.99970307606960 | 1.87344786743808  |
| F  | 0.08115572323972  | 0.09233304391013  | -1.46306717078630 |
| F  | 0.57127347716065  | -1.60499719888884 | -0.21834147985196 |
| F  | 1.89733330548677  | 0.10844244958510  | -0.26576479351167 |
| Si | -2.76620697865937 | 0.53847645256310  | 1.27240116057639  |
| H  | -3.52249363511267 | 1.79809065743532  | 1.11040209760119  |
| H  | -3.44686358538656 | -0.30417039904723 | 2.28309097311731  |

**3<sup>Si</sup>e**      E = -2545.322688972603 au

ZPE = 0.36944153 au

G = 0.31165744 au

|    |                   |                   |                   |
|----|-------------------|-------------------|-------------------|
| P  | -2.64089256990149 | -0.47710946160411 | -0.43566136498352 |
| Si | 0.37311873787246  | 0.56781917817197  | 1.55932700932485  |
| Si | -4.93493889057165 | -0.46011252755808 | -0.38597619943456 |
| Si | -1.90518227602958 | -2.66699927232486 | -0.29614776412444 |
| Si | -1.85245532175651 | 0.74381085597976  | -2.23554885430531 |
| F  | 0.24715843293283  | -0.64770020018976 | 2.70468829350916  |
| F  | 1.16560051253131  | -0.41139557161147 | 0.52713995669302  |
| F  | 1.30736841573431  | 1.49339582834913  | 2.48651150476362  |
| F  | 0.23129575951577  | 1.76182845880555  | 0.36329188775025  |
| C  | -5.43919728927139 | -1.38956336687102 | 1.15892802384412  |
| H  | -5.00317314409901 | -0.95007641760560 | 2.05602911129186  |
| H  | -6.52758495505664 | -1.35390328649458 | 1.25925285783984  |
| H  | -5.14591104663860 | -2.43951163106378 | 1.11856807143306  |
| C  | -5.47837489762497 | 1.32846320339524  | -0.30187931533097 |
| H  | -5.24709454384080 | 1.86542235943082  | -1.22300207926430 |
| H  | -6.56248493901648 | 1.36511181529892  | -0.16279446279054 |
| H  | -5.01241093022330 | 1.86019822489233  | 0.52787874236513  |

|    |                   |                   |                   |
|----|-------------------|-------------------|-------------------|
| C  | -5.68300641865231 | -1.27446751259496 | -1.89817972119432 |
| H  | -6.77213693454304 | -1.24254871695893 | -1.79765233813043 |
| H  | -5.42252319522358 | -0.75656024680608 | -2.82017641056844 |
| H  | -5.39208561520957 | -2.31843648485806 | -1.99985281908299 |
| C  | -1.82857639301384 | -3.07492563619205 | 1.52181920798169  |
| H  | -1.56091806126004 | -4.13045336581823 | 1.62918866828866  |
| H  | -1.07153307863421 | -2.48064575955681 | 2.03633498876163  |
| H  | -2.78566531915009 | -2.92136218919033 | 2.02166313550696  |
| C  | -0.24547816689015 | -2.84526396656852 | -1.12203457305605 |
| H  | -0.31507435083741 | -2.72119036774118 | -2.20318283931401 |
| H  | 0.48890988498770  | -2.14550723379485 | -0.72712721561042 |
| H  | 0.11438009015316  | -3.86054847074706 | -0.92837751812354 |
| C  | -3.15236334161569 | -3.75645601512647 | -1.17998620280014 |
| H  | -4.12857986395153 | -3.76696630374407 | -0.69523329173166 |
| H  | -3.28683390748229 | -3.46597906428965 | -2.22324751230688 |
| H  | -2.77196745573694 | -4.78213766458169 | -1.17174182763591 |
| C  | -0.06775985469395 | 0.33313560164646  | -2.57201546466932 |
| H  | 0.30493496213575  | 1.06849090419783  | -3.29221003856436 |
| H  | 0.54587485857684  | 0.40187448202336  | -1.67594886629504 |
| H  | 0.05270320242788  | -0.65468277153286 | -3.01519915308264 |
| C  | -2.90869758810122 | 0.28291447003095  | -3.71814726124826 |
| H  | -3.92782550538006 | 0.66160091177556  | -3.63472402426567 |
| H  | -2.46444480621797 | 0.73255486189209  | -4.61104982783443 |
| H  | -2.95377600069068 | -0.79532249841458 | -3.88111959397541 |
| C  | -2.07811711268159 | 2.54217537063410  | -1.79127791046831 |
| H  | -1.40272539737008 | 2.81742484309702  | -0.98155298893372 |
| H  | -1.82741669444883 | 3.15007082382215  | -2.66589556324584 |
| H  | -3.09984656511306 | 2.78314935035523  | -1.49831657709369 |
| Si | -2.00115582544623 | 0.60838962882031  | 1.50771237989613  |
| H  | -2.67979161724504 | 1.91632050713607  | 1.31795616912112  |
| H  | -2.80166575324782 | -0.13669381591512 | 2.51289046109409  |

**3<sup>sf</sup>**      E = -3495.133782579800 au

            ZPE = 0.41449044 au

            G = 0.34438995 au

|    |                   |                   |                   |
|----|-------------------|-------------------|-------------------|
| P  | -2.66630450634824 | -0.61112772830700 | -0.53542965857468 |
| Si | 0.56646569998184  | 0.87231656588509  | 1.67814574288169  |
| Si | -4.94144616636234 | -0.27980528760536 | -0.31478596990824 |
| Si | -2.28688451706107 | -2.89058707898960 | -0.53358432889171 |
| Si | -1.99217598699705 | 0.29013346973916  | -2.54973708336048 |
| C  | -5.55324780134919 | -1.44573622285245 | 1.01515650720250  |
| H  | -4.99218970225941 | -1.32986339931456 | 1.94337246305159  |
| H  | -6.60082930289849 | -1.21511561172233 | 1.22858172800381  |
| H  | -5.50119397973268 | -2.49103148206903 | 0.71141931191878  |

|   |                   |                   |                   |
|---|-------------------|-------------------|-------------------|
| C | -5.25984709845555 | 1.49401268540994  | 0.17951599246756  |
| H | -4.75981133479022 | 2.20899345573291  | -0.47328175649536 |
| H | -6.33664009486255 | 1.67812968120231  | 0.11676226162746  |
| H | -4.94409241275536 | 1.69576044363911  | 1.20239713637397  |
| C | -5.78537601384446 | -0.63828273374133 | -1.94883658146096 |
| H | -6.86635830233866 | -0.56583756763050 | -1.79703309966300 |
| H | -5.51522292224186 | 0.08866631940211  | -2.71537916006375 |
| H | -5.57107182237049 | -1.63619548625193 | -2.32924121811097 |
| C | -2.49268729558498 | -3.53913745614346 | 1.20372707397549  |
| H | -3.50767774078089 | -3.39316770733065 | 1.57217468810524  |
| H | -2.29861977991171 | -4.61597842972761 | 1.18681414218437  |
| H | -1.79660705977353 | -3.08570798542867 | 1.90475989597893  |
| C | -0.59087316954494 | -3.18858674492192 | -1.25332507905159 |
| H | -0.55936242567108 | -2.94293640941492 | -2.31590137791488 |
| H | 0.18507302825149  | -2.62681833085604 | -0.73762810046723 |
| H | -0.35252878818095 | -4.25157030814886 | -1.15406061005471 |
| C | -3.59267545410160 | -3.66288717080429 | -1.64027613264435 |
| H | -4.59908584552638 | -3.55621973754661 | -1.23527409700271 |
| H | -3.58453788304424 | -3.26181674215233 | -2.65296928445485 |
| H | -3.38274389934915 | -4.73449015377423 | -1.70971525427749 |
| C | -0.13520962066210 | 0.33437641440260  | -2.61789725009596 |
| H | 0.16294777691306  | 0.52519163365666  | -3.65341804316534 |
| H | 0.27193652206579  | 1.13253804094878  | -2.00327932035303 |
| H | 0.32554513216543  | -0.60290209552944 | -2.30967247958079 |
| C | -2.65317118267478 | -0.83022317508955 | -3.90161223393855 |
| H | -3.72834883293919 | -0.99218406651417 | -3.84825223134108 |
| H | -2.43651648384735 | -0.35953409635388 | -4.86521078451134 |
| H | -2.15611507480744 | -1.80103803717437 | -3.89853086296970 |
| C | -2.74615793413474 | 1.99670264414546  | -2.66117697340498 |
| H | -2.38304597354652 | 2.48318589501499  | -3.57096135269359 |
| H | -3.83511987712597 | 1.96841928066998  | -2.71493943067126 |
| H | -2.44947198881937 | 2.61823583757666  | -1.81589928131518 |
| C | 0.99946470163641  | 1.61378570298254  | 3.46444020167585  |
| C | 0.25770651799050  | 2.74288033702678  | 0.92175779588900  |
| C | 0.71610923051801  | -1.03504949685672 | 2.39046372485892  |
| C | 2.07517830359359  | 0.51763411494145  | 0.42966349334157  |
| F | 1.32774245788843  | 3.53554368523964  | 0.71940385600340  |
| F | -0.60379319943228 | 3.46268735932248  | 1.69630856719842  |
| F | -0.37782996521629 | 2.65889865385854  | -0.31336198517664 |
| F | -0.14360989350529 | 1.74613963816379  | 4.20197920758672  |
| F | 1.57082590042869  | 2.83735682918245  | 3.42740773382340  |
| F | 1.83043860555524  | 0.83232953153950  | 4.18849917522789  |
| F | -0.00932334555126 | -1.22027070043297 | 3.53067372054429  |
| F | 0.13837968931714  | -1.91436144427014 | 1.47986514756635  |
| F | 1.94053712435088  | -1.53979079246373 | 2.63421066496602  |

|    |                   |                   |                   |
|----|-------------------|-------------------|-------------------|
| F  | 2.19008712649398  | 1.37427721869095  | -0.61155186215864 |
| F  | 3.250591744408506 | 0.57685341282936  | 1.09979253858570  |
| F  | 2.01383905333645  | -0.72361598624928 | -0.13383188496147 |
| Si | -1.80548139526764 | 0.45579039064766  | 1.32669351110001  |
| H  | -2.58924864354189 | 1.70620961396527  | 1.27013630683329  |
| H  | -2.41587324736184 | -0.39948923014812 | 2.37273991976247  |

**3<sup>Na</sup>**      E = -1204.046468975972 au  
                   ZPE = 0.14368853 au  
                   G = 0.10517019 au

|    |                   |                   |                   |
|----|-------------------|-------------------|-------------------|
| P  | -0.78260861545272 | -0.29652270458448 | 1.12458018957204  |
| Si | -3.42286688315109 | -0.81575759355681 | -0.34369949325324 |
| C  | -0.58328052435014 | 1.43770870312255  | 0.68200486349654  |
| H  | -1.19779811573680 | 2.04415660706533  | 1.34786825179338  |
| H  | 0.46197378333527  | 1.73564512836681  | 0.77644208863518  |
| H  | -0.92288158233290 | 1.57543917026924  | -0.34213438062098 |
| C  | -0.22524757337894 | -0.46831398835905 | 2.83466552344466  |
| H  | 0.80955861560122  | -0.14012115085729 | 2.93170188899935  |
| H  | -0.85198698225630 | 0.13834685281697  | 3.48898993983277  |
| H  | -0.29576242238620 | -1.51227098704834 | 3.14146141509131  |
| C  | 0.33654968153652  | -1.27833877267965 | 0.11194869887013  |
| H  | 0.27314011022331  | -2.32059953872104 | 0.42546250911978  |
| H  | 0.02673928674533  | -1.19785563658806 | -0.92731162331124 |
| H  | 1.36130405275997  | -0.92317022257579 | 0.23028542280891  |
| F  | -4.59777853437984 | -1.36111807735496 | 0.68865059448207  |
| F  | -4.24331032565228 | 0.51066653931729  | -0.74469542008499 |
| F  | -2.05887415486502 | -0.26160820116285 | -1.21350152393589 |
| F  | -3.53413292688637 | -2.09938756435308 | -1.30646871053516 |
| N  | -2.31972661118435 | -0.80531342313606 | 1.08430240992368  |
| H  | -2.72969065818817 | -1.09964369998059 | 1.95846802567138  |

**3<sup>Nb</sup>**      E = -2153.842877035704 au  
                   ZPE = 0.18846127 au  
                   G = 0.13671065 au

|    |                   |                   |                   |
|----|-------------------|-------------------|-------------------|
| P  | -3.16748295401845 | -0.49432896691580 | -0.35023460068735 |
| Si | -0.40804909052826 | 0.59873512148346  | 0.94882742758784  |
| C  | -0.42109387255758 | -1.34424609291853 | 1.50710302342487  |
| C  | 1.01045768462934  | 0.27790112059229  | -0.40217603781660 |
| C  | 0.22499005159917  | 1.18711020588726  | 2.73260907418665  |
| C  | -0.60147243143277 | 2.52904920110704  | 0.31670993739769  |
| F  | -1.74644446182594 | 3.13547043389385  | 0.82234103836120  |
| F  | 0.40216545846497  | 3.37128238154641  | 0.60323527979609  |



|   |                   |                   |                   |
|---|-------------------|-------------------|-------------------|
| F | -0.77959416754349 | 2.58350401023694  | -1.04251900433968 |
| F | -0.35324291397846 | 2.34425675639946  | 3.13868350515953  |
| F | 0.01590065604338  | 0.30284270113538  | 3.73346457901437  |
| F | 1.56304159535901  | 1.41330665046461  | 2.68724302590354  |
| F | 0.69448708500496  | -1.83178722352762 | 2.06689832234975  |
| F | -1.43658310445813 | -1.64537119525255 | 2.37396364063792  |
| F | -0.67278089314921 | -2.16145897211280 | 0.40306076888386  |
| F | 0.43402553251808  | -0.08515615677835 | -1.59699142477207 |
| F | 1.86064817845574  | -0.71964843473417 | -0.08560435178582 |
| F | 1.77319034492736  | 1.35472490127835  | -0.66863604426793 |
| N | -2.17888129735052 | 0.45989946396157  | 0.52634394014342  |
| H | -2.60666257173335 | 1.37199042006778  | 0.64984040955234  |
| C | -4.59958121359614 | 0.52452508349264  | -0.75594201720542 |
| C | -3.79455206006778 | -1.94364445833215 | 0.51395615199099  |
| C | -2.44380870049892 | -1.04211485169001 | -1.89985415712857 |
| H | -4.27668303290446 | 1.40125722561534  | -1.31763709486525 |
| H | -5.09421506248697 | 0.84725274447696  | 0.16092804492902  |
| H | -5.30715779115219 | -0.04710246402596 | -1.35664078517853 |
| H | -2.11953488611227 | -0.17268616515352 | -2.47033394658326 |
| H | -3.19019611419554 | -1.60281721848664 | -2.46487539583110 |
| H | -1.58107854327978 | -1.67398707663939 | -1.70520675130235 |
| H | -2.98980671286907 | -2.64751584335368 | 0.70575629538732  |
| H | -4.56047621917671 | -2.41847660152115 | -0.10194064812027 |
| H | -4.22701578208595 | -1.63589151019705 | 1.46554220517776  |

**3<sup>Nc</sup>**      E = -1252.203682853196 au  
                   ZPE = 0.11210578 au  
                   G = 0.07467423 au

|    |                   |                   |                   |
|----|-------------------|-------------------|-------------------|
| N  | -2.39802271440252 | 0.03268185043169  | 0.72959982822345  |
| H  | -2.94437559769350 | 0.80687091412790  | 1.07821393434967  |
| P  | -3.10741074372336 | -0.91089860569287 | -0.36363442738781 |
| Si | -0.62415272955571 | 0.12246578803574  | 1.06575753285854  |
| F  | -0.51588621467178 | -1.27298136343584 | 0.06618034475028  |
| F  | 0.04053359028997  | -0.68592206137092 | 2.28614404195623  |
| F  | 0.35000339194945  | 0.91572520179715  | 0.05867216714780  |
| F  | -0.94716560626964 | 1.45988143923718  | 1.98094010794882  |
| N  | -4.68110679672340 | -0.42896023847173 | -0.46170570342114 |
| H  | -5.21064268560250 | -0.74121242929784 | -1.26114322088477 |
| H  | -5.22016675742283 | -0.41787272172890 | 0.39154973602734  |
| N  | -2.63841846614515 | -0.80771696504640 | -1.94799510642242 |
| H  | -1.71011575631843 | -1.18508948843809 | -2.10004426217315 |
| H  | -2.71795046427127 | 0.11388851965549  | -2.36047579702270 |
| N  | -2.96766822827275 | -2.48134646024269 | 0.10335764121349  |
| H  | -2.07177662981964 | -2.70237171567417 | 0.52165934805947  |

H -3.27424686134680 -3.18444715388567 -0.55396105522309

**3<sup>Nd</sup>** E = -2202.001697932964 au

ZPE = 0.15677221 au

G = 0.10599688 au

|    |                   |                   |                   |
|----|-------------------|-------------------|-------------------|
| P  | -3.16282178315115 | -0.50126238019267 | -0.32941395758999 |
| Si | -0.47401168025783 | 0.61930593639624  | 0.95066412772240  |
| N  | -4.39013045791806 | 0.43718795552670  | -0.89536289886904 |
| H  | -4.95365448108443 | 0.05893125013998  | -1.64167332680122 |
| H  | -4.91748960032356 | 0.99937409340248  | -0.24413786653111 |
| N  | -2.55433571168542 | -1.12022187739788 | -1.72237067406132 |
| H  | -1.85898027559385 | -1.84388860571316 | -1.59327879838568 |
| H  | -2.24650203462490 | -0.44196051603502 | -2.40816875450016 |
| N  | -3.61768816137171 | -1.77714175754432 | 0.57718101439422  |
| H  | -3.14132593410254 | -1.92144106655634 | 1.45623020281004  |
| H  | -3.95846607827021 | -2.61563112769764 | 0.13387349105975  |
| C  | -0.40725054193035 | -1.34478215198410 | 1.46900844523092  |
| C  | 0.86650997519498  | 0.31073745151570  | -0.48853149052549 |
| C  | 0.18850593738375  | 1.16847789300802  | 2.73622224433407  |
| C  | -0.66503766039990 | 2.56272075608100  | 0.36552605465480  |
| F  | -1.79404438479979 | 3.16359404531603  | 0.90636319435945  |
| F  | 0.35493977185028  | 3.38397282069628  | 0.66014278475581  |
| F  | -0.86302534936341 | 2.65572088365726  | -0.98645288103134 |
| F  | -0.38819028680501 | 2.31372710872867  | 3.17318158125728  |
| F  | -0.00455328701450 | 0.26327348122933  | 3.72161094302126  |
| F  | 1.52503963233494  | 1.39906611714884  | 2.67630606608640  |
| F  | 0.74625272618910  | -1.77709647294005 | 1.99371772459903  |
| F  | -1.37923350619697 | -1.70430046853031 | 2.38129883261191  |
| F  | -0.65514754495264 | -2.17055326368512 | 0.37851721444022  |
| F  | 0.20660063543532  | 0.00587513601782  | -1.66056070377540 |
| F  | 1.70461472710981  | -0.72210127855937 | -0.26793788608217 |
| F  | 1.64142543691269  | 1.37509363421203  | -0.76252896681574 |
| N  | -2.25567082326386 | 0.48056467124967  | 0.58793946064644  |
| H  | -2.65523726930065 | 1.41377335250992  | 0.59911655298461  |

**3<sup>Ne</sup>** E = -2310.374454746704 au

ZPE = 0.36775992 au

G = 0.31103932 au

|    |                   |                   |                   |
|----|-------------------|-------------------|-------------------|
| N  | -0.41868265253521 | 0.16776462651844  | 0.29972103914841  |
| H  | -0.70638124424313 | 0.59324467671907  | -0.56767805113924 |
| P  | 0.12868275803843  | -1.40720781715446 | 0.18879939730515  |
| Si | -0.38859862389400 | 1.27194441680558  | 1.69213268922431  |

|    |                   |                   |                   |
|----|-------------------|-------------------|-------------------|
| Si | -0.78949017344774 | -2.08186697284935 | -1.79945426640144 |
| Si | -0.66079240031483 | -2.74857607376771 | 1.89640066860500  |
| Si | 2.42134249930732  | -1.46683736067391 | 0.09005109860849  |
| C  | -2.62073650880781 | -2.34474049097282 | -1.51138271007647 |
| C  | -0.55539802151601 | -0.66486745699139 | -3.00597398468330 |
| C  | 0.06180295619175  | -3.63102365963370 | -2.41927142187305 |
| C  | -2.32805585795910 | -2.06834912182529 | 2.37887572204321  |
| C  | -0.79938150716628 | -4.46764740225044 | 1.13558192081965  |
| C  | 0.54857008060719  | -2.87596081000355 | 3.31449458326806  |
| C  | 3.09941977115457  | -0.53765348026684 | 1.55364510685923  |
| C  | 2.91259476927589  | -0.64406684629841 | -1.52137376926818 |
| C  | 2.93388835463978  | -3.27354667203691 | 0.09702451119672  |
| H  | -1.11852521456691 | 0.22268176729106  | -2.71129326980990 |
| H  | -0.93204621988443 | -0.97084473543665 | -3.98622038577906 |
| H  | 0.48951951326052  | -0.38015845465938 | -3.12523162787930 |
| H  | -2.83126083950488 | -3.20293194324187 | -0.87397883942363 |
| H  | -3.07103656917728 | -1.46209501321192 | -1.05346650849570 |
| H  | -3.11842351092474 | -2.51138409356933 | -2.47072778635410 |
| H  | 1.10281673837335  | -3.44100356228212 | -2.68510219977229 |
| H  | -0.44751631738206 | -3.98363649930050 | -3.32039459036927 |
| H  | 0.03665429345573  | -4.43933946687348 | -1.68866229041776 |
| H  | -1.53193552419301 | -4.53232925348766 | 0.33160252257444  |
| H  | -1.10944523163555 | -5.16747798628518 | 1.91703525574324  |
| H  | 0.16084378495491  | -4.82042679997252 | 0.75374911107171  |
| H  | 4.02296064316476  | -3.33652926850328 | 0.02000108237269  |
| H  | 2.64440489052732  | -3.77671227628203 | 1.02043524878371  |
| H  | 2.51204431825337  | -3.83066149077479 | -0.74027330909920 |
| H  | 4.19131713527868  | -0.51684998570783 | 1.48437113994200  |
| H  | 2.73421934098157  | 0.48903862212344  | 1.58438254230381  |
| H  | 2.82040743293731  | -1.00790064274213 | 2.49555760831436  |
| H  | 1.51920204701088  | -3.25834697552575 | 2.99509096277874  |
| H  | 0.14559987978930  | -3.58622123032785 | 4.04305007221364  |
| H  | 0.68971387852312  | -1.91421747035625 | 3.80077723213883  |
| H  | 4.00030885724850  | -0.53990926008782 | -1.55991500813717 |
| H  | 2.60469792999251  | -1.22130124950076 | -2.39455326890501 |
| H  | 2.48460850655972  | 0.35726061838504  | -1.59675221097173 |
| F  | 0.20903597021155  | -0.05240916969846 | 2.59002671510336  |
| F  | -1.64626054332574 | 1.38834845187457  | 2.69978564950566  |
| F  | 0.93658615843993  | 2.12609274738419  | 2.05866583094314  |
| F  | -0.97605613616590 | 2.45331871736739  | 0.68358606461558  |
| H  | -2.23224260694779 | -1.07400907677156 | 2.81410878775496  |
| H  | -2.78565445123076 | -2.72928602229365 | 3.12067667933556  |
| H  | -3.00407608335495 | -2.00608801285060 | 1.52508434628206  |

3<sup>Nf</sup>

E = -3260.164845599747 au

ZPE = 0.41268415 au

G = 0.34359488 au

|    |                   |                   |                   |
|----|-------------------|-------------------|-------------------|
| P  | -2.24715799163697 | -0.59462801455631 | -0.61215530647489 |
| Si | -0.09229641657864 | 0.72595632205042  | 1.70966253680324  |
| Si | -4.49715928456333 | -0.34577877084501 | -0.13717129768088 |
| Si | -1.87004631002014 | -2.88127009900482 | -0.78222723828843 |
| Si | -1.84264044372742 | 0.46290345999726  | -2.63127594093482 |
| C  | -4.90208086660350 | -1.54847749842595 | 1.24045162712924  |
| H  | -4.19311845315581 | -1.45510274495490 | 2.06487972324988  |
| H  | -5.89499565384649 | -1.30964711075656 | 1.63217336132347  |
| H  | -4.91605883345333 | -2.58834180330957 | 0.91579236163983  |
| C  | -4.71028823195209 | 1.40127633845857  | 0.50552860250886  |
| H  | -4.31744745821759 | 2.15848550115369  | -0.17074452546687 |
| H  | -5.78269974925573 | 1.58153502859512  | 0.62742033131856  |
| H  | -4.24864037919581 | 1.55119688201098  | 1.48219186633629  |
| C  | -5.57281911029116 | -0.61423492184162 | -1.64641623222591 |
| H  | -6.61963744562236 | -0.55329618281538 | -1.33519799596681 |
| H  | -5.41336963857412 | 0.15640884901122  | -2.40120636208566 |
| H  | -5.42358878547296 | -1.58836083112714 | -2.11005996294736 |
| C  | -1.73296919844566 | -3.55920012339108 | 0.94878434227467  |
| H  | -2.63476367102678 | -3.38111637412389 | 1.53330077755213  |
| H  | -1.57888895819529 | -4.64056320353396 | 0.88581642848355  |
| H  | -0.89302012170489 | -3.12678477007913 | 1.48729395950830  |
| C  | -0.36212577413037 | -3.27880165749250 | -1.81649296697726 |
| H  | -0.36880058602771 | -2.76410810591945 | -2.77825290150365 |
| H  | 0.56460710668174  | -3.03131782635479 | -1.30412501470486 |
| H  | -0.36468755797462 | -4.35368866120809 | -2.02010886113974 |
| C  | -3.37399960774931 | -3.59026292690848 | -1.66170932233886 |
| H  | -4.29704850973247 | -3.46713989046029 | -1.09661680511070 |
| H  | -3.51868541103734 | -3.16658946156935 | -2.65570909051734 |
| H  | -3.21056523679518 | -4.66458426167779 | -1.78763288015996 |
| C  | -0.02671196322960 | 0.62964566356150  | -3.02446459116462 |
| H  | 0.05680606280015  | 1.11113022347636  | -4.00381961471287 |
| H  | 0.49901097656670  | 1.24461540598086  | -2.29805380167457 |
| H  | 0.47342682725896  | -0.33643831044940 | -3.07978981687358 |
| C  | -2.64892667570881 | -0.63622591990159 | -3.92625311614014 |
| H  | -3.70603785089767 | -0.82079206117601 | -3.74078872051654 |
| H  | -2.56753137201582 | -0.13678913277179 | -4.89605243625575 |
| H  | -2.14196385852121 | -1.59791549830093 | -4.01588148816918 |
| C  | -2.68046807378003 | 2.13538140933819  | -2.56340591668992 |
| H  | -2.43669331013979 | 2.69125352560716  | -3.47310165704852 |
| H  | -3.76650230429283 | 2.05114721095020  | -2.50983858813437 |
| H  | -2.33223981236306 | 2.72228055730326  | -1.71404655668099 |
| C  | 1.45508503431335  | 1.39134642588929  | 2.81544796506238  |

|   |                   |                   |                   |
|---|-------------------|-------------------|-------------------|
| C | -0.43962739479623 | 2.53908049898405  | 0.97337020403124  |
| C | -1.08978182655761 | 0.10280277009440  | 3.32435681094758  |
| C | 1.07691088667283  | -0.54325465251387 | 0.74722498318653  |
| F | 0.23918743115461  | 3.57083659799342  | 1.48968575481907  |
| F | -1.75935308364194 | 2.88647096011404  | 1.06155407472612  |
| F | -0.15224184763250 | 2.53305362477470  | -0.37084913734035 |
| F | 1.08410859765086  | 2.28654584633415  | 3.77051113253534  |
| F | 2.42087757599973  | 2.01804258629101  | 2.08811386224769  |
| F | 2.08784672987108  | 0.37465778922881  | 3.47326010145795  |
| F | -2.33416903013540 | 0.69779422612189  | 3.38014455720625  |
| F | -1.33390230761887 | -1.23548419913459 | 3.26233418004491  |
| F | -0.53238895574200 | 0.32099984943429  | 4.51973885553311  |
| F | 2.37261845581124  | -0.21925028122209 | 0.65132670014636  |
| F | 1.02962496343022  | -1.77369393155909 | 1.33356165353448  |
| F | 0.66088580721977  | -0.74236578715104 | -0.54585357764571 |
| N | -1.60545311810649 | 0.12604349842123  | 0.75028887751874  |
| H | -2.37938847526303 | 0.54099674336067  | 1.25236180244558  |

**3<sup>P</sup>a**      E = -1490.232914733634 au  
                  ZPE = 0.13713763 au  
                  G = 0.09732873 au

|    |                   |                   |                   |
|----|-------------------|-------------------|-------------------|
| P  | -1.17006706074242 | -0.02120401154016 | 1.46115090825022  |
| H  | -1.74813022080433 | 1.19916180653039  | 1.03270362321193  |
| P  | -1.76769976674974 | -1.01327280192642 | -0.36063554412809 |
| Si | 1.10216732928673  | 0.35987238231040  | 0.96320448338416  |
| C  | -3.56113226983252 | -0.81690703933052 | -0.56561996246539 |
| H  | -3.80629822667299 | 0.24173134206004  | -0.64960597528039 |
| H  | -3.89838139933271 | -1.33435551056184 | -1.46501477887988 |
| H  | -4.07439355549248 | -1.22659280325991 | 0.30367323360542  |
| C  | -1.45223106116780 | -2.78957665886217 | -0.24691124987182 |
| H  | -1.82085104030797 | -3.28882615659385 | -1.14403498221670 |
| H  | -0.38005894437281 | -2.94362722687582 | -0.14566996713280 |
| H  | -1.96058812094067 | -3.19171535061642 | 0.62899701810068  |
| C  | -1.01840924750442 | -0.42154151804264 | -1.89912131515305 |
| H  | -1.43169498384720 | -0.96864857106280 | -2.74855910102855 |
| H  | -1.22479670391508 | 0.64238315497135  | -2.01332732646404 |
| H  | 0.05908808552659  | -0.56168557585860 | -1.84552912433227 |
| F  | 1.05948652534700  | -1.21650498114399 | 0.34825717377355  |
| F  | 2.26226223848897  | -0.01757267686887 | 2.00461348658601  |
| F  | 0.82617056025751  | 1.84385114687991  | 1.63265538700287  |
| F  | 1.56972777277639  | 0.95263419979200  | -0.46527310696180 |

**3<sup>P</sup>b**      E = -2440.032721850929 au

ZPE = 0.18229909 au

G = 0.12933714 au

|    |                   |                   |                   |
|----|-------------------|-------------------|-------------------|
| P  | -1.65442891609861 | 0.87940629849225  | 1.43371788167898  |
| H  | -1.96866584014565 | 2.09911447082093  | 0.79016650310134  |
| P  | -2.27392779794276 | -0.14656698175923 | -0.37661677248385 |
| Si | 0.76974811569746  | 0.95495209943462  | 1.40849571757316  |
| C  | 1.71612548962755  | 1.76385452562722  | 2.95381194384269  |
| C  | 0.66809896819094  | -0.84106929609964 | 2.37254506479102  |
| C  | -4.08580679710973 | -0.01525132162440 | -0.37498335492251 |
| H  | -4.37834118604483 | 1.03464507034195  | -0.36786981283258 |
| H  | -4.49524818268602 | -0.49602055951072 | -1.26498636105094 |
| H  | -4.48452936972575 | -0.49602454588569 | 0.51735135506693  |
| C  | -1.89650442442080 | -1.91117537083560 | -0.38948218467757 |
| H  | -0.83240281747536 | -2.06024336265309 | -0.55080992234869 |
| H  | -2.17330451560551 | -2.35899684927041 | 0.56339295375196  |
| H  | -2.46466351529343 | -2.37786831601116 | -1.19573887874338 |
| C  | -1.74130766548625 | 0.54068681849921  | -1.96293382617457 |
| H  | -2.24440250295505 | 0.00113411614219  | -2.76784052832981 |
| H  | -2.00462448411674 | 1.59622000823276  | -2.00639202879248 |
| H  | -0.66425904845028 | 0.44522113790356  | -2.06692171118650 |
| F  | 1.59716091335910  | 3.10533504716969  | 3.04242697723572  |
| F  | 1.29697699407498  | 1.27425231092744  | 4.14395913426858  |
| F  | 3.04411846650859  | 1.49557486494460  | 2.86306290238720  |
| F  | 1.81849495525047  | -1.24981689896981 | 2.94007476169596  |
| F  | 0.29665452653481  | -1.84803822773815 | 1.50617840119742  |
| F  | -0.27405531434496 | -0.87931478442297 | 3.35650915715649  |
| C  | 0.67092513090422  | 2.72638858731078  | 0.41993630638183  |
| F  | 1.84315731229529  | 3.37897688648000  | 0.30248703169599  |
| F  | 0.20450292165016  | 2.55671971763994  | -0.86574112134433 |
| F  | -0.19596716947212 | 3.61576476853265  | 0.98937056193272  |
| C  | 1.91374303286662  | 0.15110450012086  | -0.01104110262275 |
| F  | 2.76864174590831  | -0.78083101644970 | 0.44429362152545  |
| F  | 2.64455436835044  | 1.02203423253216  | -0.72740826340395 |
| F  | 1.10622416615495  | -0.49634952992222 | -0.93263949636960 |

**3<sup>P</sup>c** E = -1538.383998394767 au

ZPE = 0.10573767 au

G = 0.06739327 au

|    |                   |                   |                   |
|----|-------------------|-------------------|-------------------|
| P  | -2.79531448597346 | 0.02807321312124  | 1.54098949890831  |
| H  | -3.05265255332729 | 1.29070267562253  | 0.95126805331914  |
| P  | -3.27550269330736 | -0.89561946633011 | -0.34101627848741 |
| Si | -0.45292711276885 | -0.16602345248831 | 1.17649615628475  |
| F  | -0.75346214875000 | -1.78981573457604 | 1.54137696350592  |

|   |                   |                   |                   |
|---|-------------------|-------------------|-------------------|
| F | 0.68310778210611  | -0.07090086125745 | 2.30358343202318  |
| F | 0.03517193678869  | -0.55563560651154 | -0.32695054289681 |
| F | -0.44663864461153 | 1.45412845167601  | 0.87586367370581  |
| N | -4.88431676656567 | -0.64715183176438 | -0.62491550892185 |
| H | -5.26596439771685 | -0.93126632646918 | -1.51594505730711 |
| H | -5.51641341756016 | -0.77016425087556 | 0.15126627989800  |
| N | -2.64550909642028 | -0.33239530517893 | -1.77593263615575 |
| H | -1.63576269984196 | -0.42872049961317 | -1.82545654976702 |
| H | -2.93104474063359 | 0.60329550398481  | -2.03540256372321 |
| N | -2.82914582669342 | -2.47109380743808 | -0.22184802118176 |
| H | -2.06627544437877 | -2.65777712245121 | 0.42441456512212  |
| H | -2.80591896034539 | -3.02694106945058 | -1.06467635432632 |

**3<sup>P</sup>d**      E = -2488.186755460795 au

    ZPE = 0.15022336 au

    G = 0.09812203 au

|    |                   |                   |                   |
|----|-------------------|-------------------|-------------------|
| P  | -2.80396607705578 | 0.28339123800475  | 1.43977618046768  |
| H  | -3.23979701216874 | 1.54879766819957  | 0.99197151011440  |
| P  | -3.29292128470308 | -0.54964519993853 | -0.50665160480446 |
| Si | -0.43130822444493 | 0.61601769196019  | 1.16758235982164  |
| N  | -4.70840304913100 | 0.17160976999608  | -0.94073399771914 |
| H  | -5.08315093128042 | -0.01515239588636 | -1.85950196177885 |
| H  | -5.40301074957604 | 0.35646180535278  | -0.23434913173508 |
| N  | -2.41764721618104 | -0.34356274887591 | -1.89457208060681 |
| H  | -1.54898421098880 | -0.86193121283879 | -1.93316218051238 |
| H  | -2.28112395513581 | 0.61601735734482  | -2.18755885848223 |
| N  | -3.34682446243206 | -2.17653862070264 | -0.30137849067447 |
| H  | -2.96230244288187 | -2.57038269559702 | 0.54326284593388  |
| H  | -3.32032868159145 | -2.78666916298387 | -1.10420831519107 |
| C  | -0.24748716088629 | -1.22154680729409 | 2.03477676784803  |
| C  | 0.65334567777895  | 0.01276085299773  | -0.39094356674222 |
| C  | 0.51906263147622  | 1.46471085473187  | 2.68880637536059  |
| C  | -0.80272327379412 | 2.42491457403408  | 0.31423031186868  |
| F  | -1.42607519695194 | 3.26481489521207  | 1.18690781781677  |
| F  | 0.28596111470911  | 3.08080028047623  | -0.13335802004623 |
| F  | -1.65576436623263 | 2.35412702122199  | -0.77265654228223 |
| F  | 1.09709564956812  | 2.64530405168635  | 2.38856897569071  |
| F  | -0.36428377460922 | 1.71256515700829  | 3.69605308306053  |
| F  | 1.49408037911667  | 0.68962249651588  | 3.20863728820553  |
| F  | 0.97810685155933  | -1.77659084738763 | 1.98664573201469  |
| F  | -0.62037066770739 | -1.20209483132302 | 3.33732465612995  |
| F  | -1.08912184546664 | -2.16360707490739 | 1.45128184064124  |
| F  | 0.30687151123499  | -1.25794342318509 | -0.78711058907759 |
| F  | 1.96570303361946  | -0.02246637062387 | -0.09768994809252 |

F 0.52425359415653 0.76214257680147 -1.51285292722909

**3<sup>Pe</sup>** E = -2596.579782248152 au

ZPE = 0.36150906 au

G = 0.30353246 au

|    |                   |                   |                   |
|----|-------------------|-------------------|-------------------|
| P  | -0.98376971743202 | 0.49098482865991  | 0.18498829577090  |
| H  | -0.12556075468867 | 1.10344377309316  | -0.75686714778820 |
| P  | 0.05304664787301  | -1.46249237869642 | 0.10408163146121  |
| Si | -0.22669691848854 | 1.57695304444084  | 2.09350206277117  |
| Si | -0.79060723045304 | -2.25732109318297 | -1.87788855553067 |
| Si | -0.70317372657008 | -2.79607210356608 | 1.83526393391456  |
| Si | 2.34931790134604  | -1.39285850869114 | 0.06974214921784  |
| C  | -2.62424780200807 | -2.51898947103505 | -1.60464481434121 |
| C  | -0.53487156290783 | -0.93077441710682 | -3.17451249284132 |
| C  | 0.06823314918768  | -3.84168491467916 | -2.39555283686937 |
| C  | -2.35203449666665 | -2.10063084150083 | 2.36200358233781  |
| C  | -0.87448730264215 | -4.53342982471218 | 1.13789979546126  |
| C  | 0.54120165696828  | -2.87595614874937 | 3.22448981008825  |
| C  | 3.00829703240689  | -0.57558777210661 | 1.60286593126067  |
| C  | 2.83132038673787  | -0.44051698293258 | -1.46845579839145 |
| C  | 2.92499504536857  | -3.17663964417558 | -0.03835138969829 |
| H  | -1.07267798645040 | -0.01781998678673 | -2.91810169296101 |
| H  | -0.92429983244155 | -1.29140761388810 | -4.13089448896020 |
| H  | 0.51572071373303  | -0.67853155860300 | -3.31697205463842 |
| H  | -2.84201986840607 | -3.33009587870142 | -0.91067382653115 |
| H  | -3.08810004411803 | -1.60713639484809 | -1.22561036629478 |
| H  | -3.09688570055303 | -2.76341976652934 | -2.56006413523474 |
| H  | 1.10477274056141  | -3.66068967630350 | -2.68393065659750 |
| H  | -0.44601047272349 | -4.25347857168304 | -3.26866159426746 |
| H  | 0.05665829766496  | -4.60170892093834 | -1.61518763787310 |
| H  | -1.60736408895623 | -4.61612035126961 | 0.33667931466183  |
| H  | -1.19771510624112 | -5.19414998955147 | 1.94776833647236  |
| H  | 0.08046048070131  | -4.91470051200384 | 0.77170341341714  |
| H  | 4.01765634855970  | -3.19265063027987 | -0.08601071657335 |
| H  | 2.62976790152244  | -3.75055680976238 | 0.84134575926387  |
| H  | 2.54605641689715  | -3.68995017859115 | -0.92147923447921 |
| H  | 4.10141499095582  | -0.62137157968363 | 1.56244433694467  |
| H  | 2.71002396010125  | 0.46838685609970  | 1.67982156436013  |
| H  | 2.6786943140402   | -1.07663565731979 | 2.51113515967281  |
| H  | 1.49208607560385  | -3.30320758812011 | 2.90331681418416  |
| H  | 0.13434015733518  | -3.53553776838705 | 3.99749615425921  |
| H  | 0.71524181303496  | -1.89610864637616 | 3.66179772543328  |
| H  | 3.91303118188851  | -0.28073294253070 | -1.46414717664993 |
| H  | 2.57887570114702  | -0.97463403685224 | -2.38515767153375 |



|   |                   |                   |                   |
|---|-------------------|-------------------|-------------------|
| H | 2.35494332186027  | 0.54083587572442  | -1.49566790441348 |
| F | 0.11128156590116  | 0.05563773047869  | 2.74996790327854  |
| F | -1.26940614514287 | 1.90314065439855  | 3.27565735948839  |
| F | 1.29140527780148  | 2.07705347671894  | 2.33966098512320  |
| F | -0.63131140402867 | 2.92708206478313  | 1.21097054332202  |
| H | -2.22658640898318 | -1.12464513425450 | 2.83045559486079  |
| H | -2.80996181451849 | -2.77270057383599 | 3.09339487313083  |
| H | -3.04178354214181 | -1.99729289616202 | 1.52338725231163  |

**3<sup>P</sup>f**      E = -3546.376871915610 au

ZPE = 0.40671654 au

G = 0.33639067 au

|    |                   |                   |                   |
|----|-------------------|-------------------|-------------------|
| P  | -2.57091197992850 | -0.64517106380112 | -0.56889844309616 |
| Si | 0.34031724447385  | 0.88333601473580  | 1.98754413497874  |
| Si | -4.86722811415273 | -0.45389869605246 | -0.38320395579869 |
| Si | -2.08415379080606 | -2.88598972465002 | -0.87786693547771 |
| Si | -1.97144808681013 | 0.51367523148320  | -2.47976463987176 |
| C  | -5.39792446405844 | -1.72059911230269 | 0.89091069334661  |
| H  | -4.83870652770057 | -1.60371583848007 | 1.82003756777034  |
| H  | -6.45676570767560 | -1.57116284694342 | 1.11960201218534  |
| H  | -5.27758473718052 | -2.74601605908122 | 0.54068257962033  |
| C  | -5.26228983511460 | 1.27337344050233  | 0.20937873608265  |
| H  | -4.90333076689987 | 2.04111425952409  | -0.47534666511974 |
| H  | -6.34952255664083 | 1.37243254677907  | 0.28291278390459  |
| H  | -4.82926916366264 | 1.46393364001971  | 1.18994228334136  |
| C  | -5.73544885511675 | -0.75909875440468 | -2.01892687752614 |
| H  | -6.81444484326265 | -0.72802233567314 | -1.84076479913756 |
| H  | -5.50674161451536 | 0.01690270549489  | -2.75037676219656 |
| H  | -5.50229732789877 | -1.72721213134835 | -2.45965977688246 |
| C  | -2.12271017456821 | -3.73417427208756 | 0.78591548679788  |
| H  | -3.08927310077285 | -3.61942879639086 | 1.27721113066916  |
| H  | -1.95702619345003 | -4.80388326695402 | 0.62574836100189  |
| H  | -1.34912353219008 | -3.37243660475337 | 1.45916605211014  |
| C  | -0.43209352804800 | -3.06827314779051 | -1.73252777092030 |
| H  | -0.45468752176682 | -2.67343749599304 | -2.74885486150004 |
| H  | 0.37419195133002  | -2.58138852740530 | -1.18951885577093 |
| H  | -0.19589080596306 | -4.13435779920469 | -1.80138446493216 |
| C  | -3.42513673751098 | -3.62229776581684 | -1.96754740627325 |
| H  | -4.40498661748758 | -3.60918735165617 | -1.49079034605794 |
| H  | -3.50547677601791 | -3.12746743504814 | -2.93464658023700 |
| H  | -3.16704555484232 | -4.66916536037875 | -2.15385345692178 |
| C  | -0.12872711636417 | 0.74188371309296  | -2.62913756816606 |
| H  | 0.06056859168816  | 1.21093729476106  | -3.59999004669632 |
| H  | 0.28375134360734  | 1.38857439308262  | -1.85940556492528 |

|   |                   |                   |                   |
|---|-------------------|-------------------|-------------------|
| H | 0.40724717576884  | -0.20552945362944 | -2.60597334856213 |
| C | -2.56084647432891 | -0.55216200033390 | -3.91026478880029 |
| H | -3.62288410128510 | -0.78690940075124 | -3.86505970358499 |
| H | -2.38612699741862 | 0.00693711067618  | -4.83455981458227 |
| H | -2.00346109872909 | -1.48556415886021 | -3.98742565200232 |
| C | -2.88096939683333 | 2.14812269834816  | -2.51706878852380 |
| H | -2.51272467707696 | 2.71948087151223  | -3.37433861842709 |
| H | -3.95507500193161 | 2.01443555398467  | -2.64985333812295 |
| H | -2.70818321734090 | 2.74472075039308  | -1.62339912580947 |
| C | 2.14239535151175  | 1.60948693406984  | 2.52174060392577  |
| C | -0.10108033808213 | 2.56667668056390  | 1.02200205368484  |
| C | -0.19810849890500 | 0.61087531110213  | 3.87905061995898  |
| C | 1.13367196977588  | -0.69934057145701 | 1.11243711180265  |
| F | 0.94908619907654  | 3.17412847118040  | 0.43916792431902  |
| F | -0.64866822973486 | 3.44881347344639  | 1.89005088998370  |
| F | -1.01834047495912 | 2.41155795880650  | 0.01848439854283  |
| F | 2.07117156565645  | 2.88095058699574  | 2.99852710991630  |
| F | 3.01901183064177  | 1.65007257927552  | 1.47917350570974  |
| F | 2.75227354346456  | 0.88057823974458  | 3.49185416905611  |
| F | -1.53734892572681 | 0.61175604112281  | 4.10581358557412  |
| F | 0.25095972945025  | -0.60855233099829 | 4.27946675830203  |
| F | 0.31637259145677  | 1.52194565679463  | 4.72216343314196  |
| F | 2.35926832900520  | -1.03644236543601 | 1.53904840888720  |
| F | 0.38588041790526  | -1.82866864408667 | 1.23107211338030  |
| F | 1.23739406598711  | -0.46210161230619 | -0.23056728259451 |
| P | -2.06151791985703 | 0.18350742419188  | 1.43538705924689  |
| H | -2.07996500818354 | -1.10217187760886 | 2.02376038127630  |

**3<sup>o</sup>a**      E = -1223.923772703803 au  
               ZPE = 0.13129970 au  
               G = 0.09227589 au

|    |                   |                   |                   |
|----|-------------------|-------------------|-------------------|
| O  | -1.28732015090332 | 0.98699228991570  | 0.97686059386462  |
| P  | -1.90875991243413 | 0.28165021954083  | -0.22733348491363 |
| Si | 0.47154999187661  | 1.14786727856637  | 1.34045444984247  |
| C  | -3.69288121666594 | 0.35612113026642  | -0.04267080787826 |
| H  | -4.00758886539947 | 1.39887403755831  | 0.00079779371570  |
| H  | -4.18540058903934 | -0.13710021287907 | -0.88148496441705 |
| H  | -3.97678513573974 | -0.13835514400874 | 0.88641406726201  |
| C  | -1.40664719481126 | -1.43965726704694 | -0.31665736393193 |
| H  | -0.32222525996509 | -1.47782499095369 | -0.42145319010000 |
| H  | -1.68101470912445 | -1.94196345720930 | 0.61066117846730  |
| H  | -1.88109192714549 | -1.93526487004157 | -1.16483203819670 |
| C  | -1.45024916430699 | 1.08053819669256  | -1.76809451062113 |
| H  | -1.92758265686087 | 0.58653815082057  | -2.61562234285576 |

|   |                   |                   |                   |
|---|-------------------|-------------------|-------------------|
| H | -1.74911317692063 | 2.12793520669077  | -1.72996413853538 |
| H | -0.36606089679651 | 1.03588894936342  | -1.87267848464793 |
| F | 1.21212565929063  | 1.90435378841771  | 2.55109403768883  |
| F | 0.28032376685162  | -0.21503200627561 | 2.25047707960350  |
| F | 1.31294345344985  | 0.36821044453813  | 0.19130593324326  |
| F | 0.39773635464457  | 2.54399338604411  | 0.46091816241007  |

**3<sup>o</sup>b**      E = -2173.734507958363 au

            ZPE = 0.17593474 au

            G = 0.12369767 au

|    |                   |                   |                   |
|----|-------------------|-------------------|-------------------|
| O  | -0.45450097723995 | 0.37074144017125  | -0.07448306664053 |
| P  | -1.92723243453691 | 0.17833653243227  | -0.44160005358388 |
| Si | 0.85944482902632  | 0.93372428573005  | 0.95481357593732  |
| C  | -3.01543015532317 | 0.92798653580345  | 0.76519704919531  |
| H  | -2.80129800673094 | 1.99368511607382  | 0.83186118066741  |
| H  | -4.05368001776063 | 0.77574369605248  | 0.46634749515806  |
| H  | -2.84074509444693 | 0.47216143767688  | 1.73893719753074  |
| C  | -2.28500261523698 | -1.57596419972651 | -0.53411831012885 |
| H  | -1.62477511160980 | -2.04056307756553 | -1.26643244299558 |
| H  | -2.09711620062465 | -2.02561351757411 | 0.44030925824317  |
| H  | -3.32449121297476 | -1.73595262493028 | -0.82386593173393 |
| C  | -2.21703287730804 | 0.92667202120284  | -2.04401431268420 |
| H  | -3.25405462186817 | 0.78583709084597  | -2.35155142179782 |
| H  | -1.98791847732428 | 1.99008387856413  | -1.98012711083475 |
| H  | -1.55298203793471 | 0.46900145985134  | -2.77757008911260 |
| C  | 0.41717456407701  | 1.88544777891739  | 2.62379682217100  |
| C  | 0.67193193699133  | -0.88533452622412 | 1.78649980469053  |
| C  | 2.80526575870698  | 0.71131530150945  | 0.67596639576116  |
| C  | 0.72694420085239  | 2.58581987426010  | -0.18320319671427 |
| F  | -0.53514105712768 | 3.14830619074946  | -0.06272560017638 |
| F  | 1.59079316788242  | 3.57984139949362  | 0.07423384970689  |
| F  | 0.84747354090319  | 2.30884157513783  | -1.51766941603627 |
| F  | -0.94854948996727 | 2.02568566189541  | 2.70747642177343  |
| F  | 0.92602618433367  | 3.13032948509747  | 2.69638733459078  |
| F  | 0.79447521705714  | 1.24779500731130  | 3.74763562266400  |
| F  | -0.57238956606949 | -1.00723322261595 | 2.38490676096000  |
| F  | 0.70130445396543  | -1.89619608159628 | 0.86539062137939  |
| F  | 1.56959324014677  | -1.21227121236622 | 2.73013836707852  |
| F  | 3.46910370847125  | 1.06965037051736  | 1.80518377899109  |
| F  | 3.31832507762019  | 1.45072731002538  | -0.33043759471555 |
| F  | 3.15200284405037  | -0.57092230672038 | 0.40971693065570  |

**3<sup>o</sup>c**      E = -1272.098530275307 au

ZPE = 0.09988382 au

G = 0.06205742 au

|    |                   |                   |                   |
|----|-------------------|-------------------|-------------------|
| O  | -0.72970884360502 | 1.12184339028732  | -0.21863172327398 |
| P  | -1.80351574768805 | 0.17656566830255  | -0.67766946811661 |
| N  | -3.38336985787787 | 0.40413473856113  | -0.27843993286724 |
| H  | -3.83916851938733 | 1.20542004022748  | -0.69041336447258 |
| H  | -3.61210193238830 | 0.28327762454172  | 0.69834393333662  |
| N  | -1.49424800495515 | -1.30434592302985 | -0.05899034215457 |
| H  | -0.57122928393480 | -1.48631225309413 | 0.30575253746948  |
| H  | -2.11253933151607 | -2.08779922417168 | -0.17295486893724 |
| N  | -1.85182409425672 | 0.35072729223313  | -2.31560907350598 |
| H  | -2.43524743987576 | -0.25462515278449 | -2.87060890752523 |
| H  | -0.98889946621837 | 0.62109307633718  | -2.76171692328261 |
| Si | 0.24502566565798  | 1.35645677972888  | 1.43199254604398  |
| F  | 1.08386452683453  | 1.56243912795955  | 2.80201101030243  |
| F  | -1.20662871299160 | 1.45235167763777  | 2.12569181427205  |
| F  | 0.81357919278799  | -0.13609575913834 | 1.15934620589263  |
| F  | 0.88328764941506  | 2.60705710640165  | 0.67164370681891  |

**3<sup>o</sup>d** E = -2221.894710827301 au

ZPE = 0.14358453 au

G = 0.09138633 au

|    |                   |                   |                   |
|----|-------------------|-------------------|-------------------|
| O  | -0.42334002023393 | 0.37382852637435  | -0.25843474062309 |
| P  | -1.90612398828260 | 0.17051214150858  | -0.53969692085346 |
| Si | 0.82328012890218  | 0.93773310709005  | 0.84708475633996  |
| C  | 0.29344388987511  | 1.93208773151263  | 2.46853199728655  |
| C  | 0.54631268409359  | -0.85187589630910 | 1.73173399075371  |
| C  | 2.76940184508140  | 0.64241943554682  | 0.66692546761281  |
| C  | 0.78937440164902  | 2.57677979694785  | -0.31163532834491 |
| F  | -0.43578179702416 | 3.19924113408897  | -0.20833767371897 |
| F  | 1.70777755641257  | 3.52334427276190  | -0.05594855819058 |
| F  | 0.91169546979921  | 2.27968957338993  | -1.64692277743969 |
| F  | -1.07847227453832 | 2.05006770637944  | 2.49162443542522  |
| F  | 0.77792267274776  | 3.18631408277078  | 2.52768608937134  |
| F  | 0.63421700688692  | 1.33256263731650  | 3.62521225458328  |
| F  | -0.71697437988290 | -0.92614717582940 | 2.28864609362258  |
| F  | 0.57525003112479  | -1.89662873543557 | 0.83355860863704  |
| F  | 1.40302937593403  | -1.18456464446627 | 2.70764498911289  |
| F  | 3.39126460725004  | 1.01962425863496  | 1.81376645107833  |
| F  | 3.35122568659909  | 1.32907354190244  | -0.33899325669895 |
| F  | 3.08452679609576  | -0.65929365879013 | 0.46083980880350  |
| N  | -2.19786857062352 | 1.02916444738070  | -1.88948901794857 |
| N  | -2.10732231153836 | -1.44279880131899 | -0.60339745567591 |

|   |                    |                   |                   |
|---|--------------------|-------------------|-------------------|
| N | -3.01318052461454  | 0.71638490987460  | 0.52416769729233  |
| H | -1.321311103392070 | -2.03572546699058 | -0.38206599870849 |
| H | -3.01406338767968  | -1.87676707283667 | -0.60992728149523 |
| H | -1.41539048144250  | 1.34793960960071  | -2.43986890925522 |
| H | -3.10068115474336  | 1.05628423578014  | -2.33141400678963 |
| H | -3.05567963368310  | 0.24421651298012  | 1.41728053028571  |
| H | -3.11049260424376  | 1.71935713013513  | 0.60648485553736  |

**3<sup>0</sup>e**      E = -2330.252383571642 au

            ZPE = 0.35556051 au

            G = 0.29878874 au

|    |                   |                   |                   |
|----|-------------------|-------------------|-------------------|
| P  | -2.37122352456402 | -0.64993798799987 | -0.43458546898536 |
| Si | -0.88972475182544 | 1.06024862060142  | 1.55778345913434  |
| Si | -4.55712804354832 | -0.15507431422930 | 0.07496394867183  |
| Si | -2.01434169055879 | -2.90857680803822 | -0.62544626221716 |
| Si | -1.67334095736399 | 0.47326800332845  | -2.33122715428901 |
| F  | -0.18880598192560 | 0.17306865938321  | 2.74537487491283  |
| F  | 0.52508983877769  | 1.69709231803187  | 1.10259554942038  |
| F  | -1.90156727140999 | 1.78702376965775  | 2.58854625365465  |
| F  | -1.64173638203038 | 1.88796589768728  | 0.26560837223249  |
| C  | -5.04048288166406 | -1.28681573036970 | 1.48560793946259  |
| H  | -4.32459745904574 | -1.21728045157722 | 2.30649656897062  |
| H  | -6.01846041523377 | -0.98771029219091 | 1.87239756506200  |
| H  | -5.10961122180849 | -2.33011330921605 | 1.17540004316083  |
| C  | -4.70871394818200 | 1.63447720730911  | 0.56540711443534  |
| H  | -4.42128173476476 | 2.30461021649041  | -0.24330127736824 |
| H  | -5.75117368699126 | 1.83668395479215  | 0.82992432593011  |
| H  | -4.07901292377952 | 1.86601714639866  | 1.42440837241368  |
| C  | -5.52600330673008 | -0.54461659391622 | -1.48623891974749 |
| H  | -6.59250037817225 | -0.40308839368314 | -1.29052232510978 |
| H  | -5.25491501108726 | 0.12037705474521  | -2.30772677063352 |
| H  | -5.38740635889031 | -1.57325452716730 | -1.82080236192558 |
| C  | -2.16286054155302 | -3.58999085310159 | 1.10746421573963  |
| H  | -3.19018051324540 | -3.58816230778555 | 1.47054800367548  |
| H  | -1.80235803824437 | -4.62231713234347 | 1.12312753492658  |
| H  | -1.55433417408051 | -3.00451456416117 | 1.79811381399342  |
| C  | -0.25091730513383 | -3.07941752635636 | -1.23105302291532 |
| H  | -0.12001620903335 | -2.73401770241615 | -2.25674638315958 |
| H  | 0.42583676830821  | -2.51450310583497 | -0.58725109374125 |
| H  | 0.05128819261321  | -4.12941451930006 | -1.19092986500021 |
| C  | -3.25762440095855 | -3.68515955016548 | -1.79337560280814 |
| H  | -4.27111038595065 | -3.62813031696838 | -1.39264848904276 |
| H  | -3.25277221570362 | -3.22301430311075 | -2.78056129320914 |
| H  | -3.01717161029499 | -4.74409205642226 | -1.92228667881223 |

|   |                   |                   |                   |
|---|-------------------|-------------------|-------------------|
| C | 0.17125518963377  | 0.69409571276430  | -2.17779528095038 |
| H | 0.54661731867138  | 1.17009773761957  | -3.08850279854450 |
| H | 0.42408241708797  | 1.32881514528734  | -1.32907538669164 |
| H | 0.68935718387854  | -0.25881608150988 | -2.06304827933264 |
| C | -2.11086810267056 | -0.67767458319103 | -3.75601084863569 |
| H | -3.17846816530360 | -0.90368313784377 | -3.79137938159676 |
| H | -1.85598306041388 | -0.17947043577749 | -4.69587019172717 |
| H | -1.56209220757454 | -1.61909265372823 | -3.72702335057088 |
| C | -2.58856235385044 | 2.08193973125416  | -2.58035437626353 |
| H | -2.22205777075490 | 2.54547537654720  | -3.50139231688761 |
| H | -3.66336256238269 | 1.93446218001268  | -2.69708401558572 |
| H | -2.40927599381704 | 2.76453725101353  | -1.75266587087223 |
| O | -1.43295230842826 | -0.40655731451964 | 0.83381615082685  |

**3<sup>of</sup>**      E = -3280.054402228785 au

              ZPE = 0.40051231 au

              G = 0.33152762 au

|    |                   |                   |                   |
|----|-------------------|-------------------|-------------------|
| P  | -2.40772650594989 | -0.50703480757042 | -0.52628838963997 |
| Si | -0.92818891537220 | 1.46967342279859  | 1.61977037259166  |
| Si | -4.66863975167250 | -0.37972697686825 | -0.06535869420628 |
| Si | -1.69766188867950 | -2.71879423815000 | -0.34657114139398 |
| Si | -1.91957159148493 | 0.25810351065557  | -2.66274251162890 |
| C  | -5.06524779491956 | -1.55238345336838 | 1.33514104261975  |
| H  | -4.44882346698618 | -1.34925189605137 | 2.21104518664917  |
| H  | -6.11187347500903 | -1.41534404603221 | 1.62188755657165  |
| H  | -4.93436701332985 | -2.59799275660559 | 1.05496886645077  |
| C  | -5.02154173055144 | 1.38579217829211  | 0.41054705237018  |
| H  | -4.76204048735207 | 2.09134775436916  | -0.37690049796767 |
| H  | -6.09286611641661 | 1.47823918012122  | 0.61279123045536  |
| H  | -4.48699739298778 | 1.68549010079279  | 1.31171282385081  |
| C  | -5.56810070571860 | -0.87233998665807 | -1.63614433994467 |
| H  | -6.64397388042138 | -0.86586428121281 | -1.43985679976658 |
| H  | -5.38103394462431 | -0.17200067967469 | -2.45067512116547 |
| H  | -5.30371768630636 | -1.87382861991930 | -1.97607530374560 |
| C  | -1.86072894425284 | -3.55660563432263 | 1.31231851025978  |
| H  | -2.81070031936808 | -3.35135172963466 | 1.80152633035003  |
| H  | -1.80720949612365 | -4.63325874582908 | 1.11906200522143  |
| H  | -1.06081333064151 | -3.28782537488366 | 1.99556907952590  |
| C  | 0.05059084530429  | -2.79897882991394 | -0.99866231508558 |
| H  | 0.10293504880483  | -2.57339495036456 | -2.06391227133536 |
| H  | 0.70529226929188  | -2.11101398063335 | -0.46329112027929 |
| H  | 0.43827141792911  | -3.81093130498667 | -0.85256330106821 |
| C  | -2.91727640836018 | -3.56863341572643 | -1.50283233601917 |
| H  | -3.91162195795760 | -3.62619592474550 | -1.05738684783826 |

|   |                   |                   |                   |
|---|-------------------|-------------------|-------------------|
| H | -3.00700320796628 | -3.12067232965071 | -2.48899724572695 |
| H | -2.56932845832218 | -4.59684801760861 | -1.64083517550508 |
| C | -0.07565160425376 | 0.53234854288150  | -2.69319533427163 |
| H | 0.18106427155162  | 1.04463595248745  | -3.62517485208799 |
| H | 0.25906522081096  | 1.15743131546226  | -1.86863148839281 |
| H | 0.47876140789763  | -0.40519190172016 | -2.66363855413626 |
| C | -2.42613969144646 | -1.00026956681788 | -3.95691140122005 |
| H | -3.47825945803677 | -1.27925793311373 | -3.89444275177311 |
| H | -2.26724687576390 | -0.54322491754218 | -4.93827460205273 |
| H | -1.82042380240331 | -1.90583653859601 | -3.92018848033748 |
| C | -2.88484709937083 | 1.83875832618365  | -2.89517456648504 |
| H | -2.58797035928273 | 2.28492331919001  | -3.84900673201781 |
| H | -3.96068506694468 | 1.66295035977775  | -2.93476108961217 |
| H | -2.67571795276787 | 2.56274577097389  | -2.11075368739536 |
| O | -1.69738478483813 | 0.60106929664991  | 0.36201781631523  |
| C | 1.03764468508691  | 1.63500674818531  | 1.50132676839048  |
| C | -0.78854906497544 | -0.27866872671127 | 2.59539783175109  |
| C | -1.78394601397854 | 2.34056031355188  | 3.19302296958946  |
| C | -1.22998749702255 | 3.10740305821724  | 0.48463128689753  |
| F | -2.01549660633184 | -0.90571202864595 | 2.68325204672062  |
| F | -0.00140659749211 | -1.16552974261375 | 1.88900382725676  |
| F | -0.29387175858544 | -0.27446674171300 | 3.84381990240910  |
| F | -2.74496194214557 | 3.24077991468346  | 2.86553805946535  |
| F | -2.38416028257473 | 1.47583666127967  | 4.04864957308300  |
| F | -0.85211978720919 | 3.01178068886761  | 3.91518824378903  |
| F | 1.45333533385607  | 0.95419098176791  | 0.38253442258360  |
| F | 1.70829195208125  | 1.09271701118494  | 2.54047263720550  |
| F | 1.50050360241141  | 2.89349204609761  | 1.36777008657375  |
| F | -0.87230833048229 | 4.27415472057530  | 1.06079918521636  |
| F | -0.54108763611196 | 3.05227429520957  | -0.70232477078095 |
| F | -2.54085668223269 | 3.26761369762855  | 0.10923509871707  |

**3<sup>s</sup>a**      E = -1546.519454778616 au

            ZPE = 0.12865797 au

            G = 0.08776538 au

|    |                   |                   |                   |
|----|-------------------|-------------------|-------------------|
| S  | -1.92425213784255 | 0.80298573852680  | 1.71502255617943  |
| P  | -2.27877196650544 | 0.14945837667457  | -0.09365088711583 |
| Si | 1.42800034618617  | 1.43095073828573  | 1.43248788987369  |
| C  | -4.04808281547595 | 0.14020307591728  | -0.52080661631148 |
| H  | -4.43217347045283 | 1.15743115736167  | -0.44890916774623 |
| H  | -4.21049326733848 | -0.24251300386136 | -1.53008164619506 |
| H  | -4.58091059243848 | -0.48191823724080 | 0.19776739425811  |
| C  | -1.72159578491316 | -1.55661940056687 | -0.39188165589674 |
| H  | -0.64643182372918 | -1.60544783096822 | -0.22502609181556 |

|   |                   |                   |                   |
|---|-------------------|-------------------|-------------------|
| H | -2.21568941209580 | -2.21802167088930 | 0.31926612482556  |
| H | -1.95076542632387 | -1.87587851250188 | -1.41050587667617 |
| C | -1.50122072975524 | 1.11961034160468  | -1.42341596798535 |
| H | -1.81504848441935 | 0.75729125447739  | -2.40412979518652 |
| H | -1.78412598816787 | 2.16538178992191  | -1.30966922641586 |
| H | -0.41888434635784 | 1.04170615079343  | -1.33977248325102 |
| F | 2.97561102787634  | 1.72864023939932  | 1.36664638934915  |
| F | 1.06868354587296  | 1.23958178862896  | 2.94388111228976  |
| F | 1.18968358433405  | 0.12805705654606  | 0.57944721392009  |
| F | 0.69842611154660  | 2.65286607789060  | 0.77152270390003  |

**3<sup>s</sup>b**      E = -2496.293377127565 au  
               ZPE = 0.17408388 au  
               G = 0.12171177 au

|    |                   |                   |                   |
|----|-------------------|-------------------|-------------------|
| S  | 0.02153942912429  | -0.20541883918331 | -0.90474368889702 |
| P  | -1.97577573071642 | -0.03044900213228 | -0.67399235567825 |
| Si | 0.99050290006624  | 0.97855169928207  | 0.99054693218129  |
| C  | -2.55330933197460 | 0.86208966692930  | 0.78420151908211  |
| H  | -2.19872648084396 | 1.88977194869154  | 0.76194567138941  |
| H  | -3.64500668502063 | 0.85945408239828  | 0.77342602190505  |
| H  | -2.20387544594958 | 0.36783115588979  | 1.68800938567971  |
| C  | -2.71576898428349 | -1.67795435199764 | -0.59090886090338 |
| H  | -2.42449202161735 | -2.25068559255354 | -1.47082008651759 |
| H  | -2.33919913402182 | -2.18233955435567 | 0.29827751936786  |
| H  | -3.80366469499782 | -1.60367098860239 | -0.54495361154487 |
| C  | -2.67969478253390 | 0.80820908529403  | -2.11270189685188 |
| H  | -3.76754999315363 | 0.84951852733565  | -2.03638196216948 |
| H  | -2.27091465667380 | 1.81662380691091  | -2.16058634855629 |
| H  | -2.39630620623830 | 0.26956910157563  | -3.01661705121325 |
| C  | 0.27920010918331  | 1.96076321251463  | 2.57889894842167  |
| C  | 0.84321683562607  | -0.80647845262131 | 1.90715594856106  |
| C  | 2.95663128361761  | 0.92990049728419  | 0.88476086716629  |
| C  | 0.82425639429366  | 2.59370967030739  | -0.20091710741793 |
| F  | -0.46865108415077 | 2.86908432108930  | -0.58592704010485 |
| F  | 1.27572212608475  | 3.71943300316630  | 0.38799081684777  |
| F  | 1.52380859405191  | 2.45495091605104  | -1.34931275356810 |
| F  | -0.51411847415735 | 3.01421681372653  | 2.25221662967882  |
| F  | 1.29021940688522  | 2.45008110866700  | 3.32756024540647  |
| F  | -0.48289026356058 | 1.19108894549386  | 3.39805979670933  |
| F  | -0.44705611849551 | -1.27135698238739 | 2.01459767590673  |
| F  | 1.52748444248010  | -1.77564854251569 | 1.25737468874935  |
| F  | 1.32728389972876  | -0.77589883820269 | 3.16559124880904  |
| F  | 3.53985191794932  | 0.29520228515958  | 1.92086635285518  |
| F  | 3.51700422398251  | 2.15410999475200  | 0.81578035218600  |



F 3.32779729531584 0.26342398203274 -0.24239793748031

**3<sup>s</sup>c** E = -1594.673160773300 au

ZPE = 0.09699595 au

G = 0.05736098 au

|    |                   |                   |                   |
|----|-------------------|-------------------|-------------------|
| S  | -0.31945345605678 | 1.52242039653422  | -1.21708793805281 |
| P  | -1.77981891827525 | 0.24492130555329  | -1.09827637141398 |
| N  | -3.22604469105617 | 0.58133140763818  | -0.32417159805650 |
| H  | -3.76574556255969 | 1.30896358901437  | -0.77308523863982 |
| H  | -3.11850199329812 | 0.76156298228285  | 0.66539571698691  |
| N  | -1.32291072218326 | -1.08697062439881 | -0.21101748841282 |
| H  | -0.34660012574966 | -1.33259132024468 | -0.21959133986671 |
| H  | -1.96001285062176 | -1.86131739892621 | -0.10242029730318 |
| N  | -2.37647173208070 | -0.08767728857506 | -2.61995388079779 |
| H  | -3.06723782045476 | -0.81595931722045 | -2.72826967867841 |
| H  | -1.71360463705775 | -0.02859453637009 | -3.37641389656059 |
| Si | 0.39361138355835  | 1.33679175850012  | 2.18836514797962  |
| F  | 0.73904592239719  | 1.23527611144281  | 3.72368873101943  |
| F  | -1.17515366093649 | 1.26809961917810  | 2.08831923463196  |
| F  | 1.09011209403741  | 0.11923135872246  | 1.48415165297304  |
| F  | 0.94606257033797  | 2.70670016686875  | 1.67011439419170  |

**3<sup>s</sup>d** E = -2544.453139298391 au

ZPE = 0.14179161 au

G = 0.08904310 au

|    |                   |                   |                   |
|----|-------------------|-------------------|-------------------|
| S  | -0.95554068084358 | 0.60696011677978  | -1.13172543696306 |
| P  | -2.69031073162365 | 0.25013291529963  | -0.25178698074506 |
| Si | 1.23724855611662  | 0.98361727600747  | 0.70467861074689  |
| C  | 0.06485823602858  | 2.19958130909879  | 1.71167227770387  |
| C  | 0.94534606141071  | -0.94472643433558 | 0.97860333222037  |
| C  | 2.84236169875414  | 1.19633089925262  | 1.83144636037591  |
| C  | 1.97007091119892  | 1.65201546809258  | -0.99437511426665 |
| F  | 1.46184884097275  | 2.88020758704625  | -1.24682630500504 |
| F  | 3.30886815665347  | 1.78678299601121  | -0.92294454595291 |
| F  | 1.72661896222307  | 0.87934323393836  | -2.06684870250973 |
| F  | -0.96386807101029 | 2.76751192622107  | 1.06156352864216  |
| F  | 0.78028718787721  | 3.21018946779426  | 2.23988383986831  |
| F  | -0.47013957480279 | 1.50556032195497  | 2.75802508713309  |
| F  | -0.31641206070048 | -1.25139624984260 | 1.36915553805399  |
| F  | 1.20677966123649  | -1.64630888274750 | -0.13974509415833 |
| F  | 1.75000479708304  | -1.43247073183019 | 1.94316989654429  |
| F  | 2.56442167362477  | 0.97764574976296  | 3.14108333647911  |

|   |                   |                   |                   |
|---|-------------------|-------------------|-------------------|
| F | 3.38727938238003  | 2.43072443431115  | 1.75461203301147  |
| F | 3.81449338229856  | 0.31995871831182  | 1.48309606625455  |
| N | -2.96194860193862 | 0.32081434031057  | 1.38168438125348  |
| H | -2.90183494958968 | 1.24385110959228  | 1.78712141418795  |
| H | -2.46251315453086 | -0.36429355425840 | 1.93100283047969  |
| N | -3.09583600382967 | -1.32460884294656 | -0.54692372777977 |
| H | -2.67781278775098 | -1.78097841286773 | -1.34042663683156 |
| H | -3.97971717389067 | -1.69915721617022 | -0.23889896015576 |
| N | -3.76118485261667 | 1.40057512328518  | -0.77303102932851 |
| H | -4.73958035124664 | 1.32908137489768  | -0.53784922505049 |
| H | -3.56095231348369 | 1.85906915702991  | -1.64682247420843 |

3<sup>e</sup>e      E = -2652.837752758053 au

          ZPE = 0.35321967 au

          G = 0.29546939 au

|    |                   |                   |                   |
|----|-------------------|-------------------|-------------------|
| P  | -2.36808761316513 | -0.71910407337883 | -0.40012609710719 |
| Si | -0.79136838205086 | 1.77002142966800  | 1.59432554403190  |
| Si | -4.55341481077625 | -0.23955027672122 | 0.12062927168415  |
| Si | -2.07588765802085 | -2.98481693202089 | -0.69705716094604 |
| Si | -1.63247940030375 | 0.39726016233206  | -2.29536837452885 |
| F  | 0.07283835888842  | 1.19247265403173  | 2.86864866446455  |
| F  | 0.46863158627266  | 2.52858161776104  | 0.93336085292915  |
| F  | -1.76338963287602 | 2.67217717324602  | 2.50952642185741  |
| F  | -1.72544133984402 | 2.04319366745511  | 0.23054784217650  |
| C  | -5.06955091436531 | -1.47347441256857 | 1.42978080640275  |
| H  | -4.35106743490146 | -1.49805864705425 | 2.25064416029381  |
| H  | -6.03714894182005 | -1.17531700549608 | 1.84262207384610  |
| H  | -5.17652058101598 | -2.48257546288393 | 1.02983052454129  |
| C  | -4.67195648264027 | 1.50495493858606  | 0.75537513503023  |
| H  | -4.34241077003754 | 2.23343655845614  | 0.01643444058040  |
| H  | -5.71732340038417 | 1.70999341461274  | 1.00575567036327  |
| H  | -4.06931198386186 | 1.65541533037679  | 1.65082612764588  |
| C  | -5.54292582856788 | -0.47437010026172 | -1.45713641899806 |
| H  | -6.60179851004096 | -0.30107659242849 | -1.24557455348520 |
| H  | -5.24530288276271 | 0.23316427308905  | -2.23201366270266 |
| H  | -5.44806460895176 | -1.48245971365952 | -1.86204051298377 |
| C  | -2.26399815428231 | -3.82540973778462 | 0.96102027790596  |
| H  | -3.27349157891183 | -3.73997803417068 | 1.36094513217924  |
| H  | -2.04132949774108 | -4.88945199713563 | 0.83691904826315  |
| H  | -1.57074051756640 | -3.41651982426869 | 1.69588543507091  |
| C  | -0.32418471282009 | -3.21043777192383 | -1.31751075404921 |
| H  | -0.16476060369109 | -2.80254566833427 | -2.31501151803077 |
| H  | 0.38366209738552  | -2.73719458434498 | -0.63501972059751 |
| H  | -0.09111300439167 | -4.27831854714091 | -1.35298676703278 |

|   |                   |                   |                   |
|---|-------------------|-------------------|-------------------|
| C | -3.35537230812042 | -3.64283143805639 | -1.89949784522496 |
| H | -4.36185086298567 | -3.57856933793923 | -1.48248918630997 |
| H | -3.34717281761998 | -3.12570341506465 | -2.85802188342742 |
| H | -3.14887439424958 | -4.69984523022534 | -2.09012755144069 |
| C | 0.20062349884415  | 0.64121073672965  | -2.07436857869118 |
| H | 0.62673920187960  | 1.01155527145778  | -3.01137291684918 |
| H | 0.41357464267218  | 1.36807851479475  | -1.29149173248373 |
| H | 0.70595488105473  | -0.29162617006233 | -1.82123654953295 |
| C | -2.00874724988120 | -0.74578685800232 | -3.74272535191165 |
| H | -3.07757995511299 | -0.94908153194729 | -3.83196910688640 |
| H | -1.69916776689103 | -0.23972715502058 | -4.66193778837841 |
| H | -1.48019444858469 | -1.69701759138430 | -3.70038748040363 |
| C | -2.57544307940659 | 1.98189358053477  | -2.59187032212036 |
| H | -2.20653551952385 | 2.41810934158518  | -3.52544579353041 |
| H | -3.64512634780647 | 1.80855580132915  | -2.71706182425303 |
| H | -2.42098679363136 | 2.69879637541752  | -1.79007886917747 |
| S | -1.15337241739155 | -0.45226330218388 | 1.27952993181699  |

**3<sup>sf</sup>** E = -3602.634836711979 au

ZPE = 0.39848834 au

G = 0.32832835 au

|    |                   |                   |                   |
|----|-------------------|-------------------|-------------------|
| P  | -2.32811815559220 | -0.52931317600068 | -0.89499398556028 |
| Si | 0.24573888454143  | 0.93301587932254  | 2.10301684124159  |
| Si | -4.49275074186150 | -0.29013442891806 | -0.11313638811399 |
| Si | -1.70200037311691 | -2.75914243726119 | -0.87965496424054 |
| Si | -2.27355231081338 | 0.14777014449166  | -3.10778800120533 |
| C  | -4.77481844136602 | -1.38215271188177 | 1.37977370932845  |
| H  | -4.12019580457353 | -1.12144179770195 | 2.20813886850721  |
| H  | -5.80884220374790 | -1.25010158126496 | 1.71182480070888  |
| H  | -4.63709194998051 | -2.44008619433124 | 1.15162492678855  |
| C  | -4.69362602642823 | 1.51659192228384  | 0.30324078334493  |
| H  | -4.60292283516867 | 2.14986285749198  | -0.57913582102900 |
| H  | -5.68509249212951 | 1.67662021087389  | 0.73643638197011  |
| H  | -3.94449927441429 | 1.83883330009714  | 1.02488180137193  |
| C  | -5.67549943290977 | -0.80655084264203 | -1.47853951026481 |
| H  | -6.69818192739064 | -0.71562775674605 | -1.10112681306977 |
| H  | -5.59698175054051 | -0.17271433044860 | -2.36197386176347 |
| H  | -5.53113406483195 | -1.84279198406482 | -1.78491677545880 |
| C  | -1.37918226082415 | -3.47632580120898 | 0.81124892541226  |
| H  | -1.20000122853229 | -4.54753168150759 | 0.67339908506997  |
| H  | -0.50525143368927 | -3.04614368213246 | 1.29245480903314  |
| H  | -2.23129082759490 | -3.36371648070061 | 1.47995294792344  |
| C  | -0.20967092730177 | -2.94713309335209 | -1.99291539977436 |
| H  | -0.45476125866870 | -2.76899827600193 | -3.04020866064301 |

|   |                   |                   |                   |
|---|-------------------|-------------------|-------------------|
| H | 0.59755196391935  | -2.27499752232458 | -1.70484236073343 |
| H | 0.16286878324978  | -3.97206312511672 | -1.90993875254819 |
| C | -3.18759733106336 | -3.64981441276220 | -1.61243528624803 |
| H | -4.04325437291183 | -3.63193615271679 | -0.93617227305197 |
| H | -3.50281691219017 | -3.25569837325702 | -2.57671572710607 |
| H | -2.91220511881473 | -4.69865556189765 | -1.75839545488318 |
| C | -0.48022712339501 | 0.36045099010131  | -3.58586887471000 |
| H | -0.43748119272829 | 0.79980481832673  | -4.58701198361746 |
| H | 0.03240072311625  | 1.02762559992516  | -2.89411853237791 |
| H | 0.05991639703849  | -0.58494391450260 | -3.61292252438671 |
| C | -3.10189503027390 | -1.09563749378611 | -4.24496183747121 |
| H | -4.13214492848539 | -1.31173797148586 | -3.96294991917760 |
| H | -3.11802435950867 | -0.67383163767761 | -5.25435345798446 |
| H | -2.55311722490155 | -2.03656757707967 | -4.29704497323882 |
| C | -3.16541569107189 | 1.79176188532062  | -3.17120019952391 |
| H | -3.03602239193092 | 2.22717286558228  | -4.16598801993261 |
| H | -4.23619947882398 | 1.69518790129562  | -2.98969874420163 |
| H | -2.74906768277258 | 2.48715022279359  | -2.44188383254317 |
| C | 1.32643613944828  | 0.98845934408924  | 3.76745422544022  |
| C | 0.20750056269842  | 2.88032128469843  | 1.76773641619327  |
| C | -1.35607587097945 | 0.13345398636517  | 2.92608248719795  |
| C | 1.51773849371556  | -0.14609841954340 | 1.04832841683652  |
| F | 1.00350729568537  | 3.55538878825847  | 2.61985607428827  |
| F | -1.03787032865466 | 3.38266158623287  | 1.92509259754234  |
| F | 0.62106596799737  | 3.20895346497655  | 0.52467733120650  |
| F | 0.73085997640590  | 1.72400652563098  | 4.74116320325108  |
| F | 2.55961787883971  | 1.51915211694962  | 3.58641383853648  |
| F | 1.51891262603685  | -0.25229060486285 | 4.29007709526717  |
| F | -2.43911502312682 | 0.93833806317730  | 2.83307188260233  |
| F | -1.69019961999923 | -1.04011022606208 | 2.32477315536269  |
| F | -1.21397915761045 | -0.15363436082319 | 4.23214267432654  |
| F | 2.59323512688765  | -0.54028950566143 | 1.75692784821310  |
| F | 0.95342229884909  | -1.28909733849074 | 0.57212568669790  |
| F | 1.98979768671861  | 0.53499088657037  | -0.01540220017430 |
| S | -1.13108376442756 | 0.97355333936051  | -0.14605578862860 |

**4a (Me3P)** E = -460.426855216622 au

ZPE = 0.11211418 au

G = 0.08286035 au

|   |                   |                  |                   |
|---|-------------------|------------------|-------------------|
| P | -3.51794290633782 | 2.39166804801661 | -2.37640658575280 |
| C | -2.64009422896364 | 3.20584890941021 | -3.78814287803255 |
| H | -2.93662224375513 | 2.73028790812451 | -4.72469219827240 |
| H | -2.93188767806661 | 4.25610299160217 | -3.84200530457186 |
| H | -1.55235373886317 | 3.14643150470926 | -3.69175127040055 |

|   |                   |                  |                   |
|---|-------------------|------------------|-------------------|
| C | -2.63920772461692 | 0.76246006054937 | -2.37638878122464 |
| H | -2.93240683108868 | 0.18903191239498 | -1.49526760560592 |
| H | -2.93239175978126 | 0.18902053323522 | -3.25750759101039 |
| H | -1.55177787333177 | 0.87833496794045 | -2.37638027324371 |
| C | -2.64012173286942 | 3.20586357487914 | -0.96466136290320 |
| H | -2.93190931190686 | 4.25612042493460 | -0.91082142889868 |
| H | -2.93667530302463 | 2.73031835019151 | -0.02811205667947 |
| H | -1.55237925739409 | 3.14643761401198 | -1.06102619340381 |

**4b ((NH<sub>2</sub>)<sub>3</sub>P)** E = -508.570444345650 au

ZPE = 0.08006974 au

G = 0.05181039 au

|   |                   |                  |                   |
|---|-------------------|------------------|-------------------|
| P | -3.70570339261341 | 2.34383342679947 | -2.45770269282623 |
| N | -2.87604046468458 | 0.86729240127223 | -2.61439002600280 |
| H | -1.86764340360497 | 0.85037307984139 | -2.51681340204114 |
| H | -3.32594455218345 | 0.05632761513483 | -2.21883915597949 |
| N | -3.17103643032960 | 3.22588707095811 | -1.10473698420420 |
| H | -2.17641534207457 | 3.31835177349173 | -0.93411996635457 |
| H | -3.70867662529831 | 3.11855028963296 | -0.25863826006907 |
| N | -2.66728507580769 | 3.18312277337105 | -3.56520092329164 |
| H | -2.71461651988228 | 2.79166207175089 | -4.49772281392055 |
| H | -2.88322459352104 | 4.17155784774728 | -3.60596853531023 |

**4c (Tms<sub>3</sub>P)** E = -1566.786988456767 au

ZPE = 0.33736810 au

G = 0.28819515 au

|    |                   |                   |                   |
|----|-------------------|-------------------|-------------------|
| Si | -1.74873925258041 | 1.50625488828865  | -3.26610775909734 |
| Si | -4.66548572639580 | 0.61447287820141  | -1.40721333963615 |
| Si | -1.61957581226354 | -1.18201043566440 | -0.91177693914613 |
| C  | 0.01259381867857  | 2.14359559363192  | -3.09699815714693 |
| C  | -2.82867472487061 | 2.92994549156175  | -3.85715780895050 |
| C  | -1.77821018663821 | 0.14246822486367  | -4.56541696259541 |
| C  | -5.46278317920561 | 2.30775336772984  | -1.22386750505180 |
| C  | -5.26368183038214 | -0.46753106617241 | 0.01203952647390  |
| C  | -5.23594896899222 | -0.14761039193323 | -3.03171878249869 |
| C  | -2.47405619218841 | -2.52753748099491 | -1.91503856589999 |
| C  | -1.78513550683982 | -1.58700451128500 | 0.91758720466617  |
| C  | 0.21211299198841  | -1.17661480914684 | -1.34652277319578 |
| H  | -5.19098870810870 | 2.76061126296369  | -0.26823432309202 |
| H  | -6.55246689784009 | 2.21928920024062  | -1.25956669740573 |
| H  | -5.15639622242313 | 2.99277142043188  | -2.01537076602331 |
| H  | -4.98193338023041 | 0.48147887697020  | -3.88603586069277 |

|   |                   |                   |                   |
|---|-------------------|-------------------|-------------------|
| H | -6.32382828736094 | -0.26387601984469 | -3.02121901018471 |
| H | -4.79578264814446 | -1.13171772327518 | -3.19525910077654 |
| H | -4.92111254575834 | -1.49928463481313 | -0.07643294527281 |
| H | -6.35720576140993 | -0.48256989900397 | 0.02590731668689  |
| H | -4.92321061918667 | -0.07967599473533 | 0.97409626807338  |
| H | -2.86166729687183 | 3.73164438858050  | -3.11681675843526 |
| H | -3.85361010071903 | 2.61901309824293  | -4.06379753510221 |
| H | -2.41641066424261 | 3.34484902423743  | -4.78140419897986 |
| H | 0.05697229709046  | 2.96656882053921  | -2.38081947816654 |
| H | 0.37756173413029  | 2.51240799778757  | -4.05991975618260 |
| H | 0.69738281271830  | 1.36699123919724  | -2.75442038781582 |
| H | -1.10664810803255 | -0.67792897455546 | -4.30765487576388 |
| H | -1.45050671480515 | 0.54454943782719  | -5.52872780389331 |
| H | -2.77798702676668 | -0.27160431127923 | -4.69918022680904 |
| H | -2.43191136924020 | -2.32356927639233 | -2.98539553345303 |
| H | -3.52276762520741 | -2.63851493422418 | -1.63617986139510 |
| H | -1.98290201526562 | -3.48891368141069 | -1.73728442768693 |
| H | -1.36544473049064 | -2.57471798605597 | 1.12904902241836  |
| H | -2.82601495833995 | -1.58922576542036 | 1.24330406784205  |
| H | -1.24832335131497 | -0.85435585290098 | 1.52363142519132  |
| H | 0.73948158255284  | -0.37388372618066 | -0.82775103098728 |
| H | 0.38506080022937  | -1.05791061739473 | -2.41704591917397 |
| H | 0.66421204694136  | -2.12491541367143 | -1.04220986720409 |
| P | -2.43501505221329 | 0.90338278505935  | -1.20057454363637 |

**5<sup>c</sup>a (CH<sub>2</sub>-SiF<sub>4</sub>)** E = -727.466653728464 au

ZPE = 0.03935832 au

G = 0.00809705 au

|    |                  |                   |                  |
|----|------------------|-------------------|------------------|
| Si | 1.94585176744339 | 0.11085676208984  | 2.78657843559431 |
| C  | 2.04261864083259 | 1.97300683766512  | 2.88325572254922 |
| H  | 2.69199190290298 | 2.30145862418140  | 3.69913940872809 |
| H  | 2.43344074961797 | 2.39229986770129  | 1.95185629086017 |
| F  | 1.29145191737059 | -0.51165751870724 | 4.07941792967223 |
| F  | 1.08484864870268 | -0.35176479626087 | 1.54718159408998 |
| F  | 3.40729251065801 | -0.47733267967236 | 2.63188018023973 |
| F  | 0.76095337247173 | 2.49382199300281  | 3.09919215826616 |

**5<sup>si</sup>b (CH<sub>2</sub>-Si(CF<sub>3</sub>)<sub>4</sub>)**E = -1677.240424817588 au

ZPE = 0.0824453 au

G = 0.03531632 au

|    |                  |                  |                  |
|----|------------------|------------------|------------------|
| Si | 1.80962081006640 | 0.27031836163301 | 2.81388859469974 |
| C  | 2.29394824764715 | 2.10181033973123 | 2.94939031731744 |

|   |                   |                   |                  |
|---|-------------------|-------------------|------------------|
| H | 3.02839703540623  | 2.21730885888123  | 3.74844280166098 |
| H | 2.74845323074768  | 2.43030505659802  | 2.01270614294526 |
| C | 1.26576955130650  | -0.62368234662680 | 4.46024031845636 |
| C | 3.62804834706530  | -0.42650927384939 | 2.57211345165276 |
| C | 0.96651896260747  | -0.35424410267050 | 1.16728989889794 |
| C | -0.48612777386673 | 1.33219537936934  | 3.06935678422423 |
| F | -0.24956135822032 | -0.91318568132277 | 1.36486884754453 |
| F | 1.70574360665066  | -1.25769991830826 | 0.50252904393690 |
| F | 0.78488506237492  | 0.70119196267227  | 0.32980436406963 |
| F | 3.72524629313089  | -1.76158927827261 | 2.44181072176135 |
| F | 4.19796188262883  | 0.12397793387926  | 1.46297170424244 |
| F | 4.42492741628344  | -0.07186682408139 | 3.61769339354363 |
| F | 2.14278064359638  | -1.56070576943068 | 4.86216159962950 |
| F | 0.05943390940038  | -1.22638191209957 | 4.36591892350881 |
| F | 1.17542094928698  | 0.28762040916820  | 5.46398593986666 |
| F | -1.13619359992105 | 1.55633365561793  | 4.15431710235130 |
| F | -1.14895296270415 | 1.87399035247814  | 2.10948011438591 |
| F | 1.22214975651294  | 2.96700804663332  | 3.23192462530450 |

**5<sup>Si</sup>a (SiH<sub>2</sub>-SiF<sub>4</sub>)E** = -978.547477899982 au

ZPE = 0.02992513 au

G = -0.00277100 au

|    |                  |                   |                  |
|----|------------------|-------------------|------------------|
| Si | 1.92479941378951 | -0.15128716711925 | 2.78155155630965 |
| Si | 2.03124399037112 | 2.18892448860143  | 2.90278568114573 |
| H  | 2.89863689009778 | 2.62316483272998  | 4.01741593951330 |
| H  | 2.53426830983088 | 2.72154606042954  | 1.61944593255805 |
| F  | 1.25057518230221 | -0.81970118598278 | 4.05146157892664 |
| F  | 1.08941658903633 | -0.61615549070788 | 1.51536278768310 |
| F  | 3.38567109126062 | -0.76105011883880 | 2.64309117854880 |
| F  | 0.54383804331148 | 2.74524767088773  | 3.14738706531461 |

**5<sup>Si</sup>b (SiH<sub>2</sub>-Si(CF<sub>3</sub>)<sub>4</sub>)** E = -1928.326343 au

ZPE = 0.07235050 au

G = 0.02347071 au

|    |                   |                   |                  |
|----|-------------------|-------------------|------------------|
| Si | 1.90517378978728  | 0.14876751936469  | 2.78073219592445 |
| Si | 2.39910690992946  | 2.44750141364594  | 2.94682180318063 |
| H  | 3.14883153486760  | 2.69601658753403  | 4.19269026940824 |
| H  | 3.15724883253530  | 2.87888406852740  | 1.75792914077011 |
| C  | 1.26348684136439  | -0.70844748043865 | 4.41942479237291 |
| C  | 3.67794198435851  | -0.63892152700564 | 2.55471822489419 |
| C  | 0.96686898371942  | -0.42183441871479 | 1.16187000515623 |
| C  | -0.68843824650182 | 1.32734223143895  | 3.13526969566658 |

|   |                   |                   |                  |
|---|-------------------|-------------------|------------------|
| F | -0.17146966806674 | -1.10129866883512 | 1.40521606943505 |
| F | 1.73829998976818  | -1.21092649140998 | 0.38761896072128 |
| F | 0.63344419399821  | 0.65778771643232  | 0.40866823451746 |
| F | 3.70863898490030  | -1.97717936192861 | 2.43353802366171 |
| F | 4.28557133587995  | -0.12208858279056 | 1.45426914615477 |
| F | 4.46770205681326  | -0.31193635111534 | 3.61321802960054 |
| F | 2.13192180526843  | -1.63066792586743 | 4.87850114934566 |
| F | 0.07213458700671  | -1.32418069436913 | 4.28400658414454 |
| F | 1.12197884878060  | 0.21749895966221  | 5.40349002422588 |
| F | -1.23083830410934 | 1.64038701246597  | 4.26406157451787 |
| F | -1.46186405269419 | 1.79265680217627  | 2.21430520795521 |
| F | 1.03272960239437  | 3.30683444122744  | 3.00454555834647 |

**<sup>5</sup>Na (NH-SiF<sub>4</sub>)** E = -743.453277 au

ZPE = 0.02740803 au

G = -0.00364512 au

|    |                   |                  |                   |
|----|-------------------|------------------|-------------------|
| Si | -2.15122578834420 | 1.22900081788442 | -2.77208962426298 |
| N  | -1.85176583418536 | 2.83937502289480 | -2.24234150933074 |
| H  | -2.24999026127625 | 3.63130236735347 | -2.73303925779339 |
| F  | -1.77044439939236 | 1.21235654230676 | -4.29983527756084 |
| F  | -2.27131363439210 | 2.98519085290346 | -0.89050879284585 |
| F  | -3.63889419033301 | 0.73243567278324 | -2.61345497573334 |
| F  | -1.23525399207661 | 0.24261237387375 | -1.96468580247277 |

**<sup>5</sup>Nb (NH-Si(CF<sub>3</sub>)<sub>4</sub>)** E = -1693.225945 au

ZPE = 0.07066973 au

G = 0.02379228 au

|    |                   |                   |                   |
|----|-------------------|-------------------|-------------------|
| Si | -2.45094877221794 | 1.29813824529225  | -2.65307580016112 |
| N  | -2.47556243270316 | 3.02881472548398  | -2.84005020806535 |
| H  | -2.63793332512831 | 3.47208602562030  | -3.73488906260308 |
| C  | -4.04865947058110 | 0.18137349275982  | -2.84512036347115 |
| F  | -5.12989885506271 | 0.97122346864636  | -3.07882333253334 |
| F  | -3.98087244801935 | -0.70185012272861 | -3.85204670066450 |
| F  | -4.32309978138910 | -0.52767870272988 | -1.71990852334956 |
| C  | -3.36696905861486 | 1.89883339776950  | -0.60633485228393 |
| F  | -4.60808705697598 | 1.94067752192502  | -0.30670001021804 |
| F  | -3.23546083365630 | 3.80044484782783  | -1.91168891539157 |
| F  | -2.69224843965732 | 2.29087525840025  | 0.40617264635227  |
| C  | -1.59674088963115 | 1.09458951790226  | -4.42313050045964 |
| F  | -1.46315785469843 | -0.17754615406579 | -4.83855428540867 |
| F  | -2.32009826290796 | 1.74526095269985  | -5.38623200478805 |
| F  | -0.35792805374188 | 1.64688844242203  | -4.44627156576068 |



|   |                   |                   |                   |
|---|-------------------|-------------------|-------------------|
| C | -1.07950834946590 | 0.45210567367954  | -1.54916198004696 |
| F | -0.33683091648958 | -0.43535222529975 | -2.23038784612016 |
| F | -1.61339324862071 | -0.21674201394360 | -0.49049599088249 |
| F | -0.23640106043788 | 1.37778093833843  | -1.03659545414360 |

**5<sup>P</sup>a (PH-SiF<sub>4</sub>)** E = -1029.756213 au  
 ZPE = 0.02178013 au  
 G = -0.01058562 au

|    |                   |                  |                   |
|----|-------------------|------------------|-------------------|
| Si | -2.11076407304541 | 1.10576653331626 | -2.84101637462020 |
| P  | -1.54214129994818 | 3.17422101599153 | -2.11201487412128 |
| H  | -2.63712528128091 | 3.75142993816018 | -2.81904461328071 |
| F  | -1.70954528397945 | 0.98113275400037 | -4.36968366937364 |
| F  | -2.22492918482292 | 3.09214613321392 | -0.64320617850791 |
| F  | -3.64625957637295 | 0.74405243590555 | -2.70923785939668 |
| F  | -1.29812340055008 | 0.02352483941211 | -2.02175167069948 |

**5<sup>P</sup>b (PH-Si(CF<sub>3</sub>)<sub>4</sub>)** E = -1979.534688 au  
 ZPE = 0.06455751 au  
 G = 0.01626284 au

|    |                   |                   |                   |
|----|-------------------|-------------------|-------------------|
| Si | -2.34845170236528 | 1.24480352837083  | -2.75877009429782 |
| P  | -2.27656980480444 | 3.53382320223820  | -2.93598185166816 |
| H  | -3.38479801032873 | 3.49698529854051  | -3.82774477555619 |
| C  | -4.02694892752323 | 0.24462161887706  | -2.90027725199343 |
| F  | -5.07177368823455 | 1.09729888096035  | -3.04944497902698 |
| F  | -4.04319704839536 | -0.58480866257327 | -3.95842794762850 |
| F  | -4.29145708282720 | -0.50824764757820 | -1.80806413349909 |
| C  | -3.41410155577132 | 1.86106148772237  | -0.45719912199186 |
| F  | -4.66597164650454 | 1.98153026984192  | -0.19465504293512 |
| F  | -3.10195267990174 | 4.00645195830721  | -1.60476138638872 |
| F  | -2.76751385078411 | 2.18245890775299  | 0.60700604608587  |
| C  | -1.51035944046884 | 0.90335561643341  | -4.50489236536047 |
| F  | -1.36724285646262 | -0.38558644122812 | -4.85368976822959 |
| F  | -2.23125697835173 | 1.50624581335949  | -5.49438989880502 |
| F  | -0.27278725155235 | 1.46551100010399  | -4.54356010432295 |
| C  | -1.05144796110537 | 0.41889813639925  | -1.55272162127486 |
| F  | -0.20329176887429 | -0.40781592597628 | -2.18871733950581 |
| F  | -1.62249437083250 | -0.29898181423536 | -0.55793050664945 |
| F  | -0.30218248491141 | 1.38231806268345  | -0.95907260695148 |

**5<sup>O</sup>a (O-SiF<sub>4</sub>)** E = -763.2806876 au  
 ZPE = 0.01504709 au

G = -0.01577122 au

|    |                   |                  |                   |
|----|-------------------|------------------|-------------------|
| Si | -2.21304853298331 | 1.03420511438606 | -2.60431648333610 |
| F  | -2.24812434737258 | 1.31677293768871 | -4.14520232685991 |
| F  | -3.65369260604445 | 2.92909745376985 | -2.11867187369813 |
| F  | -3.34141575919958 | 0.00378395394104 | -2.26018593003631 |
| F  | -0.81076552971758 | 0.48379962327462 | -2.17107741904446 |
| O  | -2.36128439468247 | 2.43573600693971 | -1.71422117702504 |

**5<sup>0</sup>b (O-Si(CF<sub>3</sub>)<sub>4</sub>)** E = -1713.288568 au

ZPE = 0.06199856 au

G = 0.01559792 au

|    |                   |                   |                   |
|----|-------------------|-------------------|-------------------|
| Si | -2.92019919739716 | 1.14417379330865  | -2.47670531597577 |
| C  | -3.70861418620926 | -0.61964623613588 | -2.44114979518675 |
| F  | -4.94350098007905 | -0.59211045815304 | -2.98462520607142 |
| F  | -2.97357839422175 | -1.50531939137215 | -3.14083058466413 |
| F  | -3.82435407929228 | -1.08525293759606 | -1.18250787189572 |
| C  | -4.20004960625977 | 2.43497553047213  | -1.83609449531735 |
| F  | -5.23661944517001 | 2.55170138566294  | -2.68973170766788 |
| F  | -3.63945139209325 | 3.65172384753199  | -1.70217833614267 |
| F  | -4.69542686623214 | 2.07663679739043  | -0.63439872792671 |
| C  | -2.43440185963517 | 1.54972079070499  | -4.30002764717375 |
| F  | -3.48461768999444 | 1.34523195326635  | -5.12098742233298 |
| F  | -2.04568507620205 | 2.83233541077323  | -4.43888355735562 |
| F  | -1.42221311660057 | 0.76773746100745  | -4.72462418276719 |
| C  | -0.38591753057228 | 0.78724245967681  | -1.47438705750793 |
| F  | -0.35417198508400 | -0.45504286968623 | -1.98355943735433 |
| F  | 0.09324923476484  | 0.75107128094792  | -0.23753607488133 |
| F  | 0.41019149981026  | 1.55953316956997  | -2.22050875509099 |
| O  | -1.64788150953161 | 1.27633274263038  | -1.45227854468721 |

**5<sup>5</sup>a (S-SiF<sub>4</sub>)** E = -1085.954720640114 au

ZPE = 0.01311290 au

G = -0.01886552 au

|    |                   |                   |                   |
|----|-------------------|-------------------|-------------------|
| Si | -2.18037762169266 | 0.90804704403688  | -2.60636654091206 |
| F  | -2.32959989930611 | 0.98609630198953  | -4.17164237879565 |
| F  | -3.79876168946006 | 3.22734382421099  | -2.23229565672543 |
| F  | -3.26719177022031 | -0.10974123804360 | -2.09168849132685 |
| F  | -0.74496897421292 | 0.37328179232401  | -2.23029673633245 |
| S  | -2.30743121510789 | 2.81836736548216  | -1.68138540590753 |

**5<sup>5</sup>b (S-Si(CF<sub>3</sub>)<sub>4</sub>)** E = -2035.853582644874 au

ZPE = 0.05902773 au

G = 0.01239109 au

|    |                   |                   |                   |
|----|-------------------|-------------------|-------------------|
| Si | -2.97671571660067 | 1.26243980179967  | -2.44987543242930 |
| C  | -3.64330848971735 | -0.55737631061713 | -2.27040221830537 |
| F  | -4.95516059884177 | -0.59502890951363 | -2.58973998192702 |
| F  | -3.00729599829341 | -1.41531468324266 | -3.08938638039347 |
| F  | -3.51796522631117 | -1.01790564327980 | -1.01268023510690 |
| C  | -4.46845809874222 | 2.44853004374501  | -2.08917321623821 |
| F  | -5.40048688244411 | 2.38060404303061  | -3.05691933679887 |
| F  | -4.07091037037412 | 3.73403623584387  | -1.99403681218276 |
| F  | -5.06266263276900 | 2.12296920202566  | -0.92125653797707 |
| C  | -2.43376415383676 | 1.51279563111177  | -4.29425805337582 |
| F  | -3.37524901196861 | 1.04658163461460  | -5.13957506701878 |
| F  | -2.25025485352347 | 2.82090422260408  | -4.56506040484916 |
| F  | -1.28240467637955 | 0.87360001549717  | -4.57481603358271 |
| C  | -0.13371343470926 | 0.71674890124530  | -1.42643129980520 |
| F  | -0.56911976138267 | -0.45635355677649 | -1.90982231028668 |
| F  | 0.55518729388394  | 0.48450868910661  | -0.30880231722619 |
| F  | 0.69728360634312  | 1.24739725616174  | -2.32435318897491 |
| S  | -1.51824317433273 | 1.86190815664353  | -1.02442589352139 |

**3<sup>o</sup>g** E = -1798.039453276 au [PBEh-3c]

ZPE = 0.302081810 au

G = 0.25273339 au

|    |                   |                   |                   |
|----|-------------------|-------------------|-------------------|
| O  | -1.38107665270086 | 0.70044379526019  | 0.14350949672726  |
| Si | -0.81494818734899 | 2.28539497719610  | 0.73880879395226  |
| P  | -1.97205409757424 | 0.23883615854774  | -1.21207018109427 |
| F  | -1.91394107983716 | 3.19920729603316  | 1.50569622693994  |
| F  | -0.37627121566882 | 1.48433257463251  | 2.10003454580442  |
| F  | 0.69524234608697  | 2.79373217248656  | 0.44296423470057  |
| F  | -1.31838399289052 | 2.89507673815019  | -0.75266611062527 |
| C  | -3.37470723897104 | 1.20191039594530  | -1.77276730416724 |
| C  | -3.64825538209496 | 1.32783266234052  | -3.13066892189782 |
| C  | -4.22788348829676 | 1.76581108525144  | -0.82768288232571 |
| C  | -4.78362203869068 | 2.00928544206109  | -3.54290799282097 |
| H  | -2.97586443171098 | 0.90964550886388  | -3.86921366368723 |
| C  | -5.35618901084720 | 2.44682556430459  | -1.24819514513511 |
| H  | -4.01093985927190 | 1.69314295431971  | 0.22972436602545  |
| C  | -5.63585340143154 | 2.56681062086626  | -2.60292245574574 |
| H  | -4.99404161525818 | 2.11258280749477  | -4.59877406910614 |
| H  | -6.01240431740498 | 2.89651226598118  | -0.51582199129973 |
| H  | -6.51735677087774 | 3.10466619086758  | -2.92565596172156 |
| C  | -2.57346226966106 | -1.42584926144388 | -0.88825538049530 |

|   |                   |                   |                   |
|---|-------------------|-------------------|-------------------|
| C | -3.56356459406993 | -1.98936569321184 | -1.68973205742537 |
| C | -2.02460057839641 | -2.15670153125547 | 0.16287661617507  |
| C | -3.99240634275871 | -3.28405981000132 | -1.44945573937533 |
| H | -4.01155099244241 | -1.41820884169479 | -2.49327159845254 |
| C | -2.46206493463410 | -3.45110433955619 | 0.39823301817310  |
| H | -1.27139485710511 | -1.71620670958259 | 0.80240803416592  |
| C | -3.44020877135004 | -4.01516648494838 | -0.40692006685441 |
| H | -4.76426172522170 | -3.71859322798296 | -2.07010290022867 |
| H | -2.04028039746795 | -4.01649824888870 | 1.21806834371362  |
| H | -3.77990874446529 | -5.02468677999353 | -0.21694830686592 |
| C | -0.75537724164422 | 0.13016629332376  | -2.53222546716489 |
| C | -0.41063265325803 | -1.11489437831743 | -3.05643678465641 |
| C | -0.14077269558919 | 1.28536616256880  | -3.02183880990241 |
| C | 0.53377672653581  | -1.20482202326182 | -4.06688161222689 |
| H | -0.87137004160029 | -2.01853690020397 | -2.68102079150634 |
| C | 0.80072719879052  | 1.18304576998582  | -4.03126981238696 |
| H | -0.38864262550775 | 2.25366920132471  | -2.61293611341026 |
| C | 1.13835209522003  | -0.05718237466093 | -4.55464001995120 |
| H | 0.79824585649212  | -2.17383582255023 | -4.46778358162340 |
| H | 1.27861084638788  | 2.07867343642996  | -4.40400689378420 |
| H | 1.87741462653575  | -0.12867543668179 | -5.34167985044008 |

**3<sup>oh</sup>**      E = -3237.896531986 au [PBEh-3c]  
                   ZPE = 0.29665207 au  
                   G = 0.24498756 au

|    |                   |                   |                   |
|----|-------------------|-------------------|-------------------|
| O  | -1.62509255686998 | 0.83100510619416  | 0.11680690932540  |
| Si | -0.46012754899088 | 1.96915359811236  | 0.76661590920878  |
| P  | -2.12709851077860 | 0.28008745978641  | -1.24511319481941 |
| Cl | -1.00038335461034 | 2.96617403409198  | 2.49979069968303  |
| Cl | 0.36358141066753  | 0.29054672246162  | 1.86051676609021  |
| Cl | 1.35360405916532  | 2.32733743448014  | -0.19008788533494 |
| Cl | -1.44406939970987 | 3.50697495397068  | -0.47652272763560 |
| C  | -3.51607908572541 | 1.21257908206802  | -1.87895442933679 |
| C  | -3.78052330198063 | 1.23899613677437  | -3.24543839247030 |
| C  | -4.36972062851376 | 1.85204873511757  | -0.98322766431180 |
| C  | -4.90612455658826 | 1.89889731861408  | -3.71418647329951 |
| H  | -3.10773073124646 | 0.76091989393465  | -3.94644700802361 |
| C  | -5.48919880370338 | 2.50971375244817  | -1.46068845040335 |
| H  | -4.15266226348882 | 1.85745143924682  | 0.07622648518906  |
| C  | -5.75834356033592 | 2.53176286346715  | -2.82265410069333 |
| H  | -5.10954215560872 | 1.92618711983142  | -4.77602256302412 |
| H  | -6.14655795189198 | 3.01767844952550  | -0.76861295022931 |
| H  | -6.63231308322046 | 3.05287448094622  | -3.19020283851650 |
| C  | -2.67757744513737 | -1.38839736970030 | -0.88387608950662 |

|   |                   |                   |                   |
|---|-------------------|-------------------|-------------------|
| C | -3.66529517206804 | -1.98997630256021 | -1.66015754690634 |
| C | -2.07612164001200 | -2.08794422256512 | 0.16130692139340  |
| C | -4.04473843756085 | -3.29556067416272 | -1.39781937865829 |
| H | -4.14953680967073 | -1.44200581703411 | -2.45864201680477 |
| C | -2.46554666388945 | -3.39410667886214 | 0.41517296586851  |
| H | -1.31811186376585 | -1.61952859872013 | 0.77816153780028  |
| C | -3.44372051856465 | -3.99691073703219 | -0.36171722483851 |
| H | -4.81541445852898 | -3.76203144037807 | -1.99623707538563 |
| H | -2.00463501532588 | -3.93801113182165 | 1.22836236815405  |
| H | -3.74494725667310 | -5.01536030319011 | -0.15510504023058 |
| C | -0.84762641194726 | 0.20418673456931  | -2.49511037498461 |
| C | -0.31326410996178 | -1.02691931168839 | -2.87151287969946 |
| C | -0.36661012840595 | 1.38362164365722  | -3.06727863169485 |
| C | 0.69471569413503  | -1.07791614839796 | -3.82025456851528 |
| H | -0.67660166068201 | -1.94463577307605 | -2.42879579051215 |
| C | 0.64033112590394  | 1.31989762649579  | -4.01383479321588 |
| H | -0.75987717591698 | 2.34420826904997  | -2.76078040370532 |
| C | 1.16950300529041  | 0.09343611966005  | -4.39029261854047 |
| H | 1.11099559758640  | -2.03309887422761 | -4.10942726679178 |
| H | 1.02060308180932  | 2.23393690889214  | -4.44844466213787 |
| H | 1.95993573681663  | 0.05130971002096  | -5.12794431248559 |

**6<sup>N</sup> (Me3N)** E = -174.163198741621 au [PBEh-3c]

ZPE = 0.12409799 au

G = 0.09687722 au

|   |                   |                   |                   |
|---|-------------------|-------------------|-------------------|
| N | -0.37244419741933 | 0.65228022507270  | -0.07591345956232 |
| C | -0.04430684867782 | 1.41043927051311  | -1.25662994465166 |
| C | -0.05531278647754 | 1.37318874106736  | 1.13085714250719  |
| C | 0.22947951366373  | -0.65691275476631 | -0.09349843341634 |
| H | -0.38085974475855 | 0.80482835354867  | 2.00350235583153  |
| H | -0.58261043064386 | 2.32829518463954  | 1.14645001890837  |
| H | 1.02080446888269  | 1.58345644062020  | 1.25141529849403  |
| H | 1.03281857864135  | 1.62441300293964  | -1.36051410904004 |
| H | -0.57173126682902 | 2.36555769097620  | -1.24735841533870 |
| H | -0.36157015867054 | 0.86957146007292  | -2.14955743816268 |
| H | 1.33236698143984  | -0.63750321357386 | -0.08798262198660 |
| H | -0.09544211721148 | -1.23053771860694 | 0.77592277252752  |
| H | -0.08713629193947 | -1.20308518250325 | -0.98342182611030 |

**6<sup>P</sup> (Me3P)** E = -460.426766838501 au [PBEh-3c]

ZPE = 0.11637512 au

G = 0.08723564 au

|   |                   |                   |                   |
|---|-------------------|-------------------|-------------------|
| P | -0.84065194553321 | 0.58851025278922  | -0.07905743243417 |
| C | -0.07084412779114 | 1.53491744070151  | -1.46916438739762 |
| C | -0.08385690090384 | 1.49098132935492  | 1.34694836574469  |
| C | 0.25208720073431  | -0.90358942477707 | -0.09726031611865 |
| H | -0.31023299194866 | 0.97057105655892  | 2.27758748114304  |
| H | -0.51152571719763 | 2.49076986522780  | 1.42233651676988  |
| H | 1.00035826213810  | 1.58480932829540  | 1.25857128427123  |
| H | 1.01247018374534  | 1.62596664217396  | -1.36780183650889 |
| H | -0.49808224804889 | 2.53656801324215  | -1.51739444587146 |
| H | -0.28837529104802 | 1.04371714301239  | -2.41761741861374 |
| H | 1.31370780603438  | -0.64857100000449 | -0.08837382700277 |
| H | 0.04043393573951  | -1.52900309496717 | 0.77004851349133  |
| H | 0.04856753407975  | -1.50165605160757 | -0.98555115747287 |

**H<sub>2</sub>**      E = -1.172386899707 au [PBEh-3c]  
               ZPE = 0.01021926 au  
               G = -0.00126753 au

|   |                   |                  |                  |
|---|-------------------|------------------|------------------|
| H | -2.58606742470436 | 1.09848483000000 | 0.04264035000000 |
| H | -3.32852583529564 | 1.09848483000000 | 0.04264035000000 |

**7g<sup>N</sup>**      E = -1973.364374947892 au [PBEh-3c]  
               ZPE = 0.45089245 au  
               G = 0.39501990 au

|    |                   |                   |                   |
|----|-------------------|-------------------|-------------------|
| O  | -1.20102615322715 | 1.15953336709980  | 0.05262186563420  |
| Si | -1.31782981340026 | 1.78701070650545  | 1.61773504400875  |
| P  | -2.26346295142026 | 0.40928342206156  | -0.92027423086160 |
| C  | -3.38643146021702 | 1.19151798576193  | -2.17520879112876 |
| C  | -3.35123403770883 | 0.92125458045756  | -3.54289636108615 |
| C  | -4.31933639864381 | 2.11122892748587  | -1.70305077933992 |
| C  | -4.25418590596203 | 1.52680954150317  | -4.40281797208816 |
| H  | -2.61926331772269 | 0.23549589008750  | -3.94556066292898 |
| C  | -5.19845916060559 | 2.74776519228374  | -2.56651841141043 |
| H  | -4.34367531224406 | 2.34397427790434  | -0.64431546177173 |
| C  | -5.17452434563624 | 2.44608280073708  | -3.91905473248208 |
| H  | -4.22777886616063 | 1.29053644834583  | -5.45856139507712 |
| H  | -5.89888310821163 | 3.47826128179710  | -2.18327436749331 |
| H  | -5.86469688414419 | 2.93151762546907  | -4.59690818920745 |
| C  | -2.63448145915531 | -1.37566030092268 | -0.66910340266630 |
| C  | -3.85793908857252 | -1.91538359359725 | -1.05580987232596 |
| C  | -1.71257541034060 | -2.18309518391481 | -0.00940282315438 |
| C  | -4.14620210820175 | -3.25179854669531 | -0.81045564569991 |
| H  | -4.58208916388744 | -1.29644402977767 | -1.57391289582365 |

|   |                   |                   |                   |
|---|-------------------|-------------------|-------------------|
| C | -2.00550941361749 | -3.51581225361005 | 0.24417510938723  |
| H | -0.75351666035650 | -1.77731460079159 | 0.28635648415138  |
| C | -3.21982972436630 | -4.05525922703702 | -0.15890163240107 |
| H | -5.09035713590445 | -3.66779196516340 | -1.13835403011508 |
| H | -1.27768670605005 | -4.13746510606114 | 0.74964760505694  |
| H | -3.43985977206461 | -5.09877155582412 | 0.02562137808492  |
| C | -0.84305220686329 | 0.14736126730227  | -2.16188354570985 |
| C | -0.68459441546606 | -1.03238138884333 | -2.88527498644746 |
| C | 0.01123981914353  | 1.21092632303666  | -2.46298371063104 |
| C | 0.29404205458223  | -1.15531898987071 | -3.86555390261510 |
| H | -1.32904663310778 | -1.88201616893106 | -2.69900870736390 |
| C | 0.98315812112782  | 1.09565115994006  | -3.44355917029795 |
| H | -0.07739609665932 | 2.14530142521843  | -1.92433754316877 |
| C | 1.13194506678356  | -0.09080136359374 | -4.14898395516132 |
| H | 0.39703551501784  | -2.08833724307709 | -4.40526478457645 |
| H | 1.63249247779675  | 1.93597793363087  | -3.65382571664652 |
| H | 1.89519916461506  | -0.18235014753681 | -4.91098862740356 |
| H | -3.32543080144091 | 0.71058755503400  | 0.05360946322263  |
| H | -3.13467875881836 | -0.18248487909080 | 2.46337357502905  |
| N | -4.06676835570971 | -0.48850304775007 | 2.89617927568454  |
| C | -5.17960679481666 | 0.10287645286124  | 2.12900398126964  |
| C | -4.0947779223529  | -1.96238427716474 | 2.84860668442596  |
| C | -4.02624088074999 | 0.01990640450701  | 4.28134440187534  |
| H | -6.12809035072315 | -0.18920821935550 | 2.57809444416338  |
| H | -5.07752588949587 | 1.18317914092138  | 2.13335322273685  |
| H | -5.12877699195066 | -0.24985177223314 | 1.10244166514699  |
| H | -3.16316130553542 | -0.40171831696580 | 4.78981856772608  |
| H | -4.93695314833422 | -0.26015005770018 | 4.80786974283636  |
| H | -3.92317449551518 | 1.10029273335280  | 4.25603551133450  |
| H | -3.20960780047620 | -2.35292450737428 | 3.34352060100279  |
| H | -4.09002456269240 | -2.29015537548076 | 1.81246403833391  |
| H | -4.98911903700950 | -2.33168625072607 | 3.34847642127029  |
| F | -2.76061848685879 | 2.25631768101790  | 2.26490634833480  |
| F | -1.75496768397739 | 0.15296581245938  | 2.17909879755665  |
| F | -0.02019731825213 | 1.67257741711390  | 2.57752281756375  |
| F | -0.97866110455659 | 3.31338207519326  | 1.12736164124713  |

**TS(3<sup>0</sup>g+6<sup>N</sup>+H<sub>2</sub>→7g<sup>N</sup>)** E = -1973.342225156093 au [PBEh-3c]

ZPE = 0.4439653240 au

v = -772.484890 cm<sup>-1</sup>

|    |                   |                  |                   |
|----|-------------------|------------------|-------------------|
| O  | 1.54825574387792  | 0.60263553167209 | 0.83200119851344  |
| Si | 1.85686472402219  | 2.03992371966766 | 1.77131486653895  |
| P  | 0.60595778995165  | 0.27480728864206 | -0.38554374928651 |
| C  | -0.51248020022387 | 1.39311644082263 | -1.29936919327771 |

|   |                   |                   |                   |
|---|-------------------|-------------------|-------------------|
| C | -0.61822946884199 | 1.23914777087451  | -2.68078905803142 |
| C | -1.27259302566063 | 2.37001534723051  | -0.66295157312888 |
| C | -1.50608657120476 | 2.02104018396563  | -3.40593027813111 |
| H | -0.01265346710590 | 0.51166670194921  | -3.20402109265434 |
| C | -2.13019202346098 | 3.17174854140199  | -1.39571614741147 |
| H | -1.18513504466420 | 2.50641265724548  | 0.40456608701972  |
| C | -2.25801371655626 | 2.99232136329041  | -2.76607899694658 |
| H | -1.59295509926290 | 1.87804187158646  | -4.47470391918399 |
| H | -2.69751545775831 | 3.94413911950746  | -0.89397104710254 |
| H | -2.93688026828764 | 3.61487921097040  | -3.33415695668887 |
| C | -0.02432548230634 | -1.42153867092024 | -0.27747396708313 |
| C | -1.20921130439463 | -1.80320604404519 | -0.89831318699412 |
| C | 0.70663329664430  | -2.35401492930006 | 0.45230629665822  |
| C | -1.66363126278503 | -3.10752547729643 | -0.78164805615824 |
| H | -1.78423952755048 | -1.08087503313662 | -1.46427626058611 |
| C | 0.24101711181686  | -3.65609784039612 | 0.57352065519041  |
| H | 1.63648617346048  | -2.06585805869678 | 0.92692709312992  |
| C | -0.94350180025958 | -4.03590268985032 | -0.04117168033590 |
| H | -2.58388048787892 | -3.39977431097609 | -1.27034087921923 |
| H | 0.81297622172108  | -4.37734420252985 | 1.14268899610698  |
| H | -1.30022720138627 | -5.05346172096195 | 0.04862910866022  |
| C | 1.92099085069654  | 0.06900948904953  | -1.66958959529272 |
| C | 2.06904453991191  | -1.09456938870722 | -2.41861196604245 |
| C | 2.78724541487671  | 1.13745148598339  | -1.90946629308273 |
| C | 3.05995027508627  | -1.19254666200740 | -3.38756605967442 |
| H | 1.41493063736913  | -1.94120267467418 | -2.25752491333781 |
| C | 3.77346059999562  | 1.03735107459669  | -2.87577529427490 |
| H | 2.68931967859732  | 2.05730293273283  | -1.34902834068407 |
| C | 3.91431272440390  | -0.12788602716797 | -3.61747599260171 |
| H | 3.16224201089554  | -2.10658262581610 | -3.95790710204891 |
| H | 4.43827241762669  | 1.87369670643563  | -3.04668283087789 |
| H | 4.68833102173584  | -0.20361043650944 | -4.37001236156409 |
| H | -0.75318887067836 | 0.48541224278816  | 0.89828960802769  |
| H | -1.03699094332948 | 0.12712647654109  | 1.85985241701569  |
| N | -1.44508695071576 | -0.29290986739532 | 2.93789846816566  |
| C | -2.49322179998315 | -1.25957087173694 | 2.61113645524926  |
| C | -0.32535397298578 | -0.90520457745793 | 3.66210514050176  |
| C | -1.96753782854001 | 0.88580225454100  | 3.63413812061248  |
| H | -2.96463965903008 | -1.64697893080160 | 3.51637130613014  |
| H | -3.24794526804352 | -0.77709657286406 | 1.99251455015326  |
| H | -2.06197937286214 | -2.08452833690375 | 2.04682527306031  |
| H | -1.16007148189869 | 1.59634028861026  | 3.78542775913976  |
| H | -2.40201263263954 | 0.60718592624055  | 4.59570950625609  |
| H | -2.73224845191671 | 1.35582291464970  | 3.01805938561772  |
| H | 0.49263544003451  | -0.19474346890330 | 3.74211855595355  |



|   |                   |                   |                  |
|---|-------------------|-------------------|------------------|
| H | 0.02436041131556  | -1.77244158839296 | 3.10765832279402 |
| H | -0.64339258646087 | -1.22024125681660 | 4.65818877672103 |
| F | 0.62084169450572  | 2.69394487632020  | 2.63012278330715 |
| F | 2.24320990583520  | 1.03765249972026  | 3.03895460399024 |
| F | 3.33978265236609  | 2.69506806633340  | 1.77033915259820 |
| F | 1.41829989192574  | 2.95664928089520  | 0.43843230458996 |

**7g<sup>P</sup>** E = -2259.609312460843 au [PBEh-3c]

ZPE = 0.43937644 au

G = 0.38225245 au

|    |                   |                   |                   |
|----|-------------------|-------------------|-------------------|
| O  | -1.55263564556840 | 0.48173146143032  | 0.39574643534598  |
| Si | -1.41929988448425 | 1.88639531212062  | 1.34071892942830  |
| P  | -2.56674021681062 | 0.32799283805127  | -0.92902027760346 |
| F  | -2.77291503044971 | 2.27364892593378  | 2.22769981268160  |
| F  | -0.89135638616009 | 0.94806837388424  | 2.63271644364011  |
| F  | -0.07710268518855 | 2.79293913125098  | 1.41030670029010  |
| F  | -2.01349881385562 | 2.82054882350179  | 0.06564129081090  |
| C  | -3.60099323384636 | 1.06644109361895  | -2.31350485448005 |
| C  | -3.48673844909478 | 0.70756012518429  | -3.65662752681561 |
| C  | -4.55901563096623 | 2.01027922034342  | -1.96057899494614 |
| C  | -4.34370703044829 | 1.24190497686006  | -4.60552291412806 |
| H  | -2.72946820029220 | 0.00238348030405  | -3.97111404837987 |
| C  | -5.39955846504256 | 2.57175872293581  | -2.91199696849803 |
| H  | -4.63467626152181 | 2.32537200902158  | -0.92606587174822 |
| C  | -5.29950270995987 | 2.17949830459839  | -4.23689055214547 |
| H  | -4.25586103525164 | 0.93550940095964  | -5.63994397300927 |
| H  | -6.12470016201980 | 3.32004690175513  | -2.61915077962139 |
| H  | -5.95529416162429 | 2.60899933946490  | -4.98326515903335 |
| C  | -3.08525501003313 | -1.42743043305421 | -0.82084645273434 |
| C  | -4.34925351752654 | -1.83237157309210 | -1.24081848572505 |
| C  | -2.24195025947082 | -2.36238449169357 | -0.22190545936546 |
| C  | -4.76220185564154 | -3.14705314616618 | -1.07142144011901 |
| H  | -5.01200707462674 | -1.11893041883074 | -1.71585270825362 |
| C  | -2.65029811763545 | -3.67989406070380 | -0.06442860734028 |
| H  | -1.25478070906770 | -2.06111477812873 | 0.10674889795395  |
| C  | -3.91219584525249 | -4.07571305838443 | -0.48647886518112 |
| H  | -5.74453080749704 | -3.44898043628824 | -1.41106261405575 |
| H  | -1.97715309616704 | -4.39982910754938 | 0.38349625998712  |
| H  | -4.22807293322857 | -5.10432367418194 | -0.36934550402340 |
| C  | -1.03800253332980 | 0.20899572348542  | -2.02672477103175 |
| C  | -0.70308291008192 | -0.94717192063799 | -2.72524051598085 |
| C  | -0.23955437843263 | 1.33966052462591  | -2.20423038262283 |
| C  | 0.40193910944193  | -0.98105707093088 | -3.56887398798196 |
| H  | -1.30456421466486 | -1.84227661027490 | -2.63036226323569 |

|   |                   |                   |                   |
|---|-------------------|-------------------|-------------------|
| C | 0.85810457178680  | 1.30797931492189  | -3.04801173081669 |
| H | -0.47636109434912 | 2.26147925566974  | -1.69041723634778 |
| C | 1.18771470194896  | 0.14609298885745  | -3.73277652455066 |
| H | 0.64268257125924  | -1.89492529196922 | -4.09741666610559 |
| H | 1.46267687671941  | 2.19780623991379  | -3.16758200873293 |
| H | 2.04835543637002  | 0.12294693909456  | -4.38857664483475 |
| H | -3.64458829085257 | 0.77928136205564  | -0.06324036451473 |
| H | -2.63196631458963 | -0.53511546900890 | 1.91413323835911  |
| P | -3.64938689274515 | -0.65265363339251 | 2.85921591500506  |
| C | -5.14159079908218 | 0.16477822929825  | 2.27295476516477  |
| C | -4.01526542476011 | -2.41101454898285 | 3.04445107044001  |
| C | -3.13075801954463 | 0.01617853438704  | 4.44506229607050  |
| H | -5.94604871403055 | 0.02920979299747  | 2.99505159833999  |
| H | -4.93853446688103 | 1.22394564558784  | 2.13718480325009  |
| H | -5.43564388028292 | -0.26382089516078 | 1.31608011735821  |
| H | -2.18760865483702 | -0.43762196291699 | 4.74122273336920  |
| H | -3.89056997829329 | -0.18790579177544 | 5.19764899825761  |
| H | -2.97500221041494 | 1.08656406544445  | 4.34447814314016  |
| H | -3.12781696382610 | -2.94401153407469 | 3.38159828591601  |
| H | -4.31603900022224 | -2.82457136450732 | 2.08204973086059  |
| H | -4.81481960757290 | -2.56169876585286 | 3.76834839829392  |

**TS (3<sup>0</sup>g+6<sup>P</sup>+H<sub>2</sub>→7g<sup>P</sup>)** E = -2259.592170069686 au [PBEh-3c]

ZPE = 0.4342786777 au

v = -854.549009 cm<sup>-1</sup>

|    |                   |                   |                   |
|----|-------------------|-------------------|-------------------|
| O  | 1.57644540167708  | 0.47708206421567  | 0.66293082507972  |
| Si | 1.91740698980570  | 1.83399080531762  | 1.69623853078509  |
| P  | 0.55144861485790  | 0.29374702299471  | -0.53120104027464 |
| F  | 0.68906611185376  | 2.72444824987939  | 2.32341405358365  |
| F  | 1.79892817278566  | 0.78578105345136  | 3.00488353494683  |
| F  | 3.46773131046280  | 2.14715917986069  | 2.04337700940101  |
| F  | 1.95257221570907  | 2.81879034192163  | 0.34974562403048  |
| C  | -0.26987570032429 | 1.58160919486992  | -1.53804695126806 |
| C  | -0.34521187263336 | 1.42867271389584  | -2.92213479794221 |
| C  | -0.85081065704297 | 2.69822827436277  | -0.94368257174445 |
| C  | -1.02757928906328 | 2.35914700221923  | -3.69145050826065 |
| H  | 0.12494194195989  | 0.58634627260218  | -3.41045652249418 |
| C  | -1.50197501842819 | 3.64221368592186  | -1.71997266724399 |
| H  | -0.78727486211940 | 2.83408129199913  | 0.12634066084046  |
| C  | -1.60070860076444 | 3.47006237464309  | -3.09293495222942 |
| H  | -1.09535642885676 | 2.21999339371640  | -4.76220560036160 |
| H  | -1.92931755148937 | 4.51756600522134  | -1.24966039390214 |
| H  | -2.11788164388171 | 4.20471534244619  | -3.69632324174477 |
| C  | -0.42333761493850 | -1.23303817829762 | -0.38882450954148 |
| C  | -1.70478777138874 | -1.33386083495570 | -0.92376434229969 |

|   |                   |                   |                   |
|---|-------------------|-------------------|-------------------|
| C | 0.10709983446880  | -2.29586962848752 | 0.33471185450251  |
| C | -2.44037272126366 | -2.49462850685348 | -0.74932130210048 |
| H | -2.12962426865041 | -0.50307064648594 | -1.47383301353639 |
| C | -0.63828176800141 | -3.45534561037877 | 0.51310876232430  |
| H | 1.10700061994270  | -2.22730778681246 | 0.74570953812357  |
| C | -1.90998515473061 | -3.55828066946192 | -0.02853442679645 |
| H | -3.43080742364192 | -2.57119676939265 | -1.17852608449335 |
| H | -0.21573367926913 | -4.28332425223291 | 1.06807358300123  |
| H | -2.48529284241037 | -4.46521491205681 | 0.10327000847378  |
| C | 1.82287036816535  | -0.24532035042217 | -1.77167328464861 |
| C | 1.70195743273965  | -1.41054021914179 | -2.52212388737284 |
| C | 2.92564979997921  | 0.58218897658881  | -1.99123936371128 |
| C | 2.66064260930225  | -1.74792502190644 | -3.47001070597887 |
| H | 0.85713536696483  | -2.07179966775114 | -2.37866269038333 |
| C | 3.87854582231517  | 0.24676324040860  | -2.93793071829277 |
| H | 3.03919580094483  | 1.49902426482728  | -1.42766555696052 |
| C | 3.75065955800836  | -0.92054024263396 | -3.67934243702390 |
| H | 2.55193992361418  | -2.66093727908564 | -4.04098736512153 |
| H | 4.72784756837588  | 0.89877535970463  | -3.09452948775056 |
| H | 4.49912376614859  | -1.18190298364463 | -4.41604619132641 |
| H | -0.63975986998585 | 0.79490608388601  | 0.65417387610746  |
| H | -0.80177804833785 | 0.37738447403241  | 1.61670311511388  |
| P | -1.08269811660155 | -0.24180632133945 | 3.09277597444105  |
| C | -2.76208661165483 | -0.94670598097905 | 3.02455491998201  |
| C | -0.04720195023463 | -1.56045179880035 | 3.79492951920499  |
| C | -1.14932641969592 | 1.07787069779065  | 4.33618468209284  |
| H | -3.08639903028348 | -1.32277376366475 | 3.99475882275695  |
| H | -3.46819249233144 | -0.18779755258510 | 2.68968881520017  |
| H | -2.77972093240976 | -1.76362497508725 | 2.30256531588929  |
| H | -0.14282611857922 | 1.44564081450543  | 4.51574972673512  |
| H | -1.57960885737218 | 0.70934527246583  | 5.26701776937150  |
| H | -1.75082638611322 | 1.90606059228713  | 3.96629241420228  |
| H | 0.99194286281627  | -1.24502885036940 | 3.77245900634710  |
| H | -0.16111270308305 | -2.46861257607976 | 3.20726557078050  |
| H | -0.34439968731649 | -1.76468866712909 | 4.82416110148679  |

**7h<sup>N</sup>** E = -3413.228469327662 au [PBEh-3c]

ZPE = 0.44572514 au

G = 0.38739326 au

|    |                   |                  |                   |
|----|-------------------|------------------|-------------------|
| O  | -1.05586148901893 | 1.01747481314468 | -0.02960481053493 |
| Si | -1.07683800039644 | 2.05718149119518 | 1.27241323020457  |
| P  | -2.26577252683768 | 0.43653567059389 | -0.99667347364555 |
| Cl | -2.79791236618442 | 2.69852421164133 | 2.33414306308411  |
| Cl | -1.23485115815234 | 0.05541056290906 | 2.59971970824059  |

|    |                   |                   |                   |
|----|-------------------|-------------------|-------------------|
| Cl | 0.72603822474741  | 2.43058185176891  | 2.17839934193890  |
| Cl | -1.11863948748527 | 3.80931426742312  | 0.04631034188212  |
| C  | -3.46767561153580 | 1.25574631751150  | -2.14564912794542 |
| C  | -3.56589722934108 | 0.95777958755192  | -3.50481235214786 |
| C  | -4.32022884381934 | 2.21490088717438  | -1.60645651978423 |
| C  | -4.52915137451486 | 1.57205549810385  | -4.28887309031520 |
| H  | -2.89313900660376 | 0.24176580424308  | -3.95671655003211 |
| C  | -5.26005190709930 | 2.85821187586734  | -2.39860259573791 |
| H  | -4.23182781006658 | 2.47828744239822  | -0.55854635421986 |
| C  | -5.37336484275700 | 2.52775543676548  | -3.73958876446858 |
| H  | -4.60955019858354 | 1.31569172312010  | -5.33711958110018 |
| H  | -5.89665402295735 | 3.62074403558767  | -1.96950633857441 |
| H  | -6.11019418123784 | 3.02099537573050  | -4.36023313909991 |
| C  | -2.69029339890571 | -1.33093854676243 | -0.75521923174740 |
| C  | -3.90537995711319 | -1.85380907523407 | -1.18923552984166 |
| C  | -1.79100677356550 | -2.15625663269798 | -0.08396428504610 |
| C  | -4.21209466969111 | -3.19098157835598 | -0.96971579358865 |
| H  | -4.60710908011013 | -1.22455719612085 | -1.72445313445038 |
| C  | -2.10053327141430 | -3.49155203913899 | 0.13293799641742  |
| H  | -0.84550289017764 | -1.76021780771550 | 0.26241474749124  |
| C  | -3.30833024038806 | -4.01343183877965 | -0.31107117697531 |
| H  | -5.15121340190613 | -3.59263527510805 | -1.32817851808980 |
| H  | -1.39036474566511 | -4.12732120903476 | 0.64555947271822  |
| H  | -3.54095901930869 | -5.05831019960912 | -0.15143727542144 |
| C  | -0.94977798182777 | 0.19327079935474  | -2.33772020879037 |
| C  | -0.77279374058516 | -1.00457891725444 | -3.02280828442981 |
| C  | -0.19456505386112 | 1.29718848525930  | -2.73925506464032 |
| C  | 0.13424566819133  | -1.10393703110008 | -4.07301183858714 |
| H  | -1.34168791113745 | -1.88445310640148 | -2.75245828920072 |
| C  | 0.70417469055258  | 1.20267315415753  | -3.78810304057068 |
| H  | -0.30666306076417 | 2.24732125644871  | -2.23103494806345 |
| C  | 0.87493418805676  | -0.00115203165260 | -4.45963424767602 |
| H  | 0.25795770890408  | -2.04991234940048 | -4.58488530638186 |
| H  | 1.27875838731550  | 2.07250776505872  | -4.07945226386673 |
| H  | 1.58135340239327  | -0.07579077604849 | -5.27623850540613 |
| H  | -3.19815489957593 | 0.79773847618455  | 0.07851749320348  |
| H  | -3.25096729259164 | -0.15924293045738 | 2.44750322172045  |
| N  | -4.19225712815611 | -0.48266717436022 | 2.78912050601909  |
| C  | -5.26006973863224 | 0.07908266115883  | 1.93900106437389  |
| C  | -4.14763343236407 | -1.95787851885090 | 2.72340699889334  |
| C  | -4.27126678313878 | -0.00000816098746 | 4.18381979229185  |
| H  | -6.22832424462199 | -0.25427080390035 | 2.30876700746845  |
| H  | -5.20001865640736 | 1.16263828592031  | 1.96422424637608  |
| H  | -5.11487865217648 | -0.25986611108416 | 0.91699284453230  |
| H  | -3.41003814806964 | -0.37397768669800 | 4.73011004655572  |

|   |                   |                   |                  |
|---|-------------------|-------------------|------------------|
| H | -5.19377416904667 | -0.35241024858988 | 4.64051156097673 |
| H | -4.23629914541966 | 1.08489415689143  | 4.18391477419379 |
| H | -3.25706362276665 | -2.30173921744290 | 3.24226413301356 |
| H | -4.09329515032476 | -2.27118898595722 | 1.68492754688772 |
| H | -5.03951448384965 | -2.37107987442072 | 3.19061907189773 |

**TS (3<sup>0</sup>h+6<sup>N</sup>+H<sub>2</sub>→7h<sup>N</sup>)** E = -3413.199152225014 au [PBEh-3c]

ZPE = 0.43811424 au

v = -893.67 cm<sup>-1</sup>

|    |                   |                   |                   |
|----|-------------------|-------------------|-------------------|
| O  | -1.11906643313020 | 0.79828410326653  | 0.07057804709062  |
| Si | -0.86735165701621 | 2.09059111529308  | 1.17450037338488  |
| P  | -2.16301323343548 | 0.28633061054199  | -0.98651736766101 |
| Cl | -2.23757407879236 | 3.19166941535543  | 2.31654919010983  |
| Cl | -0.78143378410114 | 0.53929864485958  | 2.74794432520097  |
| Cl | 1.14163179082016  | 2.54622010226481  | 1.39528885303772  |
| Cl | -1.13222577923995 | 3.47647530874143  | -0.49262795154837 |
| C  | -3.43097560771669 | 1.27864961544212  | -1.84574415811934 |
| C  | -3.04748314153272 | 2.06292420523097  | -2.93278294651437 |
| C  | -4.77429946781251 | 1.24023186757103  | -1.48443997003424 |
| C  | -3.99393950880959 | 2.78571866207047  | -3.64072069053386 |
| H  | -2.00997895357853 | 2.12815892236961  | -3.22487935591124 |
| C  | -5.72369573005446 | 1.93210058082571  | -2.21641181665067 |
| H  | -5.07203468383291 | 0.67763249124731  | -0.61164201484593 |
| C  | -5.33347104435678 | 2.71373561619040  | -3.29367186850302 |
| H  | -3.67761728534590 | 3.40809180795489  | -4.46657578845231 |
| H  | -6.76589228113542 | 1.87883755742534  | -1.93091460948088 |
| H  | -6.07078795792443 | 3.27309286967816  | -3.85426834032050 |
| C  | -2.61458688211477 | -1.44066951674647 | -0.68044397861139 |
| C  | -3.76902996743889 | -2.02137065217161 | -1.19640543528548 |
| C  | -1.72658162006116 | -2.20748094022523 | 0.06920573039154  |
| C  | -4.03885952167571 | -3.36030538210788 | -0.95294762401150 |
| H  | -4.45871415035723 | -1.43829923919444 | -1.79393563696984 |
| C  | -2.00231993532440 | -3.54562682449691 | 0.30404920996301  |
| H  | -0.83257789501647 | -1.76163817931638 | 0.48580785105566  |
| C  | -3.15747034500251 | -4.12498299866852 | -0.20166904913960 |
| H  | -4.93535783816109 | -3.80847331514516 | -1.36121593962509 |
| H  | -1.30918999767608 | -4.13672041168075 | 0.88784962223077  |
| H  | -3.36673475602358 | -5.17043252518012 | -0.01762887305243 |
| C  | -0.98218561473364 | 0.02583660253252  | -2.38049697814892 |
| C  | -1.36184950091337 | -0.78691202054628 | -3.44803619074248 |
| C  | 0.26756188840995  | 0.63779705973296  | -2.41104952359761 |
| C  | -0.51348360376683 | -0.98677373692184 | -4.52327900093024 |
| H  | -2.32797748140631 | -1.27678276391355 | -3.44820699887297 |
| C  | 1.11720928457352  | 0.43626933324698  | -3.49111768097900 |

|   |                   |                   |                   |
|---|-------------------|-------------------|-------------------|
| H | 0.58807052757171  | 1.28319996760321  | -1.60604380445180 |
| C | 0.73172590478543  | -0.37361223844385 | -4.54634819517011 |
| H | -0.82274617484741 | -1.62330409710212 | -5.34176056325619 |
| H | 2.08530841240066  | 0.91915380108740  | -3.50172622457797 |
| H | 1.39822929758033  | -0.52909462070241 | -5.38458496943969 |
| H | -3.37816069947280 | 0.51630772227412  | 0.50562289503297  |
| H | -3.83572855230517 | 0.17249460288298  | 1.40273117942506  |
| N | -4.46130455740952 | -0.27081661187760 | 2.38432772561497  |
| C | -5.83066059259261 | -0.46817313749835 | 1.91350101345073  |
| C | -3.83014627238129 | -1.53510514873009 | 2.77394027749106  |
| C | -4.38886099747092 | 0.72589837652639  | 3.45770651443264  |
| H | -6.46340602131032 | -0.87665597895108 | 2.70397608687566  |
| H | -6.24426879886450 | 0.48572201553545  | 1.59005456746306  |
| H | -5.82656069947894 | -1.15773390898977 | 1.07042156198781  |
| H | -3.35141844225109 | 0.86136044907756  | 3.74984888305035  |
| H | -4.98016890140809 | 0.40059153123029  | 4.31659385591488  |
| H | -4.76720531314160 | 1.67809225375107  | 3.09425028110012  |
| H | -2.78072053629890 | -1.34922360824287 | 2.98725083626368  |
| H | -3.90274073559873 | -2.24658208403892 | 1.95435065191533  |
| H | -4.31985860381639 | -1.95189070091747 | 3.65708258295585  |

**7h<sup>P</sup>** E = -3699.483082237902 au [PBEh-3c]

ZPE = 0.43346387 au

G = 0.37425041 au

|    |                   |                   |                   |
|----|-------------------|-------------------|-------------------|
| O  | -1.85471216557214 | 0.28382052347414  | 0.47450745682505  |
| Si | -0.67363090279168 | 1.10107785610149  | 1.27299536589768  |
| P  | -2.74203244509493 | 0.48672055522637  | -1.05121041030935 |
| Cl | -1.02363782292397 | 1.56759379101651  | 3.32715132641264  |
| Cl | 0.06620355698086  | -0.95698445753452 | 1.97435154284212  |
| Cl | 1.21717290383835  | 1.55828167839484  | 0.57437263627893  |
| Cl | -1.48458944241306 | 3.06457430855908  | 0.69728656231903  |
| C  | -3.77316349097882 | 0.81041214260133  | -2.61628165872283 |
| C  | -3.60763566846882 | 0.07913864456352  | -3.79286948567047 |
| C  | -4.72070090837868 | 1.82471582998635  | -2.60297597566440 |
| C  | -4.37689425725885 | 0.34657638440388  | -4.91144760457289 |
| H  | -2.86416754865001 | -0.70918438113631 | -3.83587877566052 |
| C  | -5.49595584060739 | 2.10585120333291  | -3.72405753303907 |
| H  | -4.85666009904906 | 2.42063191216771  | -1.70456337735618 |
| C  | -5.32633113708380 | 1.36306545771964  | -4.87934264801852 |
| H  | -4.23541932569579 | -0.23151218628238 | -5.81571151467742 |
| H  | -6.22479272349713 | 2.90571688228258  | -3.69316208917725 |
| H  | -5.92393063255109 | 1.57601898497896  | -5.75618238239640 |
| C  | -3.42179889893494 | -1.21210539381763 | -0.79315526289813 |
| C  | -4.73333765485007 | -1.50571881731953 | -1.16539271280691 |

|   |                   |                   |                   |
|---|-------------------|-------------------|-------------------|
| C | -2.63957960360283 | -2.23581483678340 | -0.25088475703359 |
| C | -5.24966135358616 | -2.78478576590717 | -1.00864122090868 |
| H | -5.36241912370051 | -0.73900787480355 | -1.59661853968917 |
| C | -3.14088929608555 | -3.52584312959553 | -0.14807599526966 |
| H | -1.63950845853733 | -2.03460478898423 | 0.10839002858958  |
| C | -4.44730196718412 | -3.80588207317880 | -0.52241185573047 |
| H | -6.27373360184229 | -2.98512047521377 | -1.29513176185341 |
| H | -2.50434239244490 | -4.31151023789766 | 0.23804803574198  |
| H | -4.83775551036834 | -4.81153645878953 | -0.43431702292300 |
| C | -1.16849789259555 | 0.67996563336428  | -1.95857033121412 |
| C | -0.19563999001601 | -0.31286636246851 | -1.95389102538939 |
| C | -0.93718618920916 | 1.86437766721923  | -2.65036548743691 |
| C | 0.98400667745253  | -0.13274489339356 | -2.65898373060673 |
| H | -0.33436936536738 | -1.22739319397290 | -1.39512360789663 |
| C | 0.25986037978767  | 2.05608533956965  | -3.31882090812506 |
| H | -1.68511160943638 | 2.64598716182616  | -2.66163834843464 |
| C | 1.21832522686077  | 1.05377226950017  | -3.33399486368651 |
| H | 1.73175377756137  | -0.91437571520571 | -2.65481413403579 |
| H | 0.44231948686701  | 2.99161828040121  | -3.83033751510351 |
| H | 2.15001315661589  | 1.20195976362692  | -3.86388361988886 |
| H | -3.41639745198194 | 1.56380691118353  | -0.44181017814892 |
| H | -2.18273553636819 | -1.05847319051631 | 2.55541945587010  |
| P | -3.44157401790517 | -0.81221200095881 | 3.13401707622469  |
| C | -4.30187094280640 | 0.61586855434547  | 2.45355540925995  |
| C | -4.50031856168419 | -2.25426660991539 | 2.88148148755285  |
| C | -3.22847316773905 | -0.62369292148512 | 4.91633645910837  |
| H | -5.20445693507322 | 0.79069840025229  | 3.03912515636190  |
| H | -3.67000859209048 | 1.50083834950363  | 2.47850381745544  |
| H | -4.58193139013349 | 0.40676632960883  | 1.42374467752189  |
| H | -2.70114166624089 | -1.49000785673072 | 5.31275409153712  |
| H | -4.19757255044029 | -0.54136860980432 | 5.40598686410828  |
| H | -2.63648482600074 | 0.26391974453012  | 5.12322061784074  |
| H | -4.00373807456662 | -3.15166393905195 | 3.24677650852872  |
| H | -4.71684878425062 | -2.39141270241878 | 1.82337140060577  |
| H | -5.43720965990492 | -2.12564466657463 | 3.42241006746284  |

**TS (3<sup>0</sup>h+6<sup>P</sup>+H<sub>2</sub>→<sup>0</sup>h<sup>P</sup>)** E = -3699.458714979 au [PBEh-3c]

ZPE = 0.433332290 au

v = -37.74 cm<sup>-1</sup>

|    |                  |                   |                   |
|----|------------------|-------------------|-------------------|
| O  | 0.76903532041650 | 0.58565790389059  | 0.99320931810403  |
| Si | 2.04699654871658 | 1.57541657695106  | 1.51156504216132  |
| P  | 0.09158080137011 | 0.04721078286712  | -0.43968156091106 |
| Cl | 1.80500667340957 | 2.21000674909671  | 3.51457244992994  |
| Cl | 3.10479960676272 | -0.24429359941629 | 2.19819184186450  |

|    |                   |                   |                   |
|----|-------------------|-------------------|-------------------|
| Cl | 3.77308760829904  | 2.31202193947069  | 0.64165772525120  |
| Cl | 0.86525665533470  | 3.31495068883546  | 0.77636057247574  |
| C  | -1.01207206666594 | 0.63010223423446  | -1.82668842767248 |
| C  | -0.74356431430491 | 0.38937386378056  | -3.17461652170931 |
| C  | -2.17308584608760 | 1.31477468282869  | -1.49287347153573 |
| C  | -1.63904437133088 | 0.79191882134037  | -4.15207849055387 |
| H  | 0.16587186327304  | -0.12190484890857 | -3.46339055866494 |
| C  | -3.05456744179839 | 1.75486135391081  | -2.47005444387291 |
| H  | -2.38778156451763 | 1.51604794709760  | -0.44944501241151 |
| C  | -2.79163566445208 | 1.48407780006295  | -3.80271813121297 |
| H  | -1.43045576441455 | 0.57729300620307  | -5.19193713369755 |
| H  | -3.94217947086193 | 2.30739174487967  | -2.19083710345830 |
| H  | -3.47888333682529 | 1.81587595949247  | -4.56994229306523 |
| C  | 0.10194542745827  | -1.78582090353307 | -0.45791891847709 |
| C  | -0.59652458374152 | -2.51823296498086 | -1.41341136979857 |
| C  | 0.76104761544732  | -2.46642943312370 | 0.56520200921312  |
| C  | -0.62899075744589 | -3.90405865134792 | -1.35246959823064 |
| H  | -1.12264524359383 | -2.01562015609796 | -2.21356785176254 |
| C  | 0.72837701902919  | -3.85263724680224 | 0.61951538306967  |
| H  | 1.33535504707192  | -1.92223015987006 | 1.30448657760635  |
| C  | 0.03325993007483  | -4.57652996501707 | -0.33707672307179 |
| H  | -1.17118717778368 | -4.45818555692608 | -2.10759602037102 |
| H  | 1.26184780277046  | -4.36622539458927 | 1.40911149346344  |
| H  | 0.01356522520803  | -5.65780464610456 | -0.29616018040439 |
| C  | 1.67539773766699  | 0.41768823152335  | -1.38313670152717 |
| C  | 2.73318754165731  | -0.48800078802780 | -1.40540865326461 |
| C  | 1.82613604176263  | 1.62986428949438  | -2.05628022364098 |
| C  | 3.90089506221419  | -0.19834712282696 | -2.09591563817649 |
| H  | 2.66042795611839  | -1.43357371209231 | -0.88657318508380 |
| C  | 2.99332449115763  | 1.92094559674506  | -2.74252826799015 |
| H  | 1.03376711555648  | 2.36601846800428  | -2.03955494765460 |
| C  | 4.03377129950069  | 1.00537924159722  | -2.76796739909419 |
| H  | 4.71059530825174  | -0.91626621541117 | -2.09926697980004 |
| H  | 3.09249606397207  | 2.87258765463267  | -3.24778114925908 |
| H  | 4.94746903994603  | 1.23316190172401  | -3.30148350600580 |
| H  | -1.14179668824589 | 0.04922910176151  | 0.35394543673712  |
| H  | -1.78070566035941 | 0.05183360497555  | 1.86758120987469  |
| P  | -1.62284193159115 | 0.39383997308141  | 3.22139320230840  |
| C  | -1.49768623629186 | 2.18528235599220  | 3.31288638368754  |
| C  | -3.13766260019161 | -0.09462264712123 | 4.08685958032088  |
| C  | -0.27709302413841 | -0.54963542433986 | 3.94713265777378  |
| H  | -1.13762976553237 | 2.49759907507655  | 4.29040753288804  |
| H  | -0.81571876741377 | 2.56793945596537  | 2.55158726957036  |
| H  | -2.49051315916861 | 2.60202166658121  | 3.14270814893925  |
| H  | -0.53847645318599 | -1.60575052483706 | 3.88589504505731  |



|   |                   |                   |                  |
|---|-------------------|-------------------|------------------|
| H | -0.16064231866758 | -0.26784437968738 | 4.99246623005958 |
| H | 0.66778743435420  | -0.39239529364117 | 3.43325411135572 |
| H | -3.27714520938581 | -1.17302427589246 | 4.03396243800688 |
| H | -4.00407092473757 | 0.39032903032897  | 3.64003360468458 |
| H | -3.07768789406652 | 0.19873220816900  | 5.13437519797538 |

3<sup>o</sup>i            E = -3284.946037504656 au [PBEh-3c]  
                   ZPE = 0.17713930 au  
                   G = -3283.03827118 au

|    |                   |                   |                   |
|----|-------------------|-------------------|-------------------|
| O  | -1.33203483004524 | 0.72516049988097  | -0.01572857149772 |
| Si | -0.46474662964489 | 2.50689495572301  | 0.53541349435909  |
| P  | -1.96299647186579 | 0.14500654675444  | -1.24762681119209 |
| F  | 0.21694591306672  | 3.90974387585145  | 0.96121093764811  |
| F  | -0.53826552708115 | 1.83087883047411  | 1.98286658793620  |
| F  | 0.68813817259248  | 2.02134971974378  | -0.48345617097866 |
| F  | -1.81377117471846 | 3.12725368431452  | -0.09986314555893 |
| C  | -3.42741105348407 | 1.06680948376997  | -1.79100607321970 |
| C  | -3.74155072883218 | 1.42335544226438  | -3.09594834866492 |
| C  | -4.30468066416141 | 1.46418852946713  | -0.78634182665670 |
| C  | -4.86050209985727 | 2.17898530388320  | -3.38830423455423 |
| C  | -5.42992578582954 | 2.21684866948671  | -1.05720943527430 |
| C  | -5.70103606562707 | 2.58093944876368  | -2.36470771242689 |
| C  | -2.60923111549313 | -1.50719421115991 | -0.90701666108487 |
| C  | -3.35640104809563 | -2.15947259615443 | -1.88013140914749 |
| C  | -2.43498780254100 | -2.14658365012396 | 0.31539649013876  |
| C  | -3.93404878332410 | -3.39020798541972 | -1.66391156495976 |
| C  | -3.00892507064750 | -3.38681296386012 | 0.55228248415307  |
| C  | -3.75710810354541 | -4.00354691472627 | -0.43284996294350 |
| C  | -0.76939852931223 | 0.04835342147330  | -2.60040605804265 |
| C  | -0.11686744020991 | -1.11996634328911 | -2.97034579628665 |
| C  | -0.32740444016829 | 1.23777418146818  | -3.16981407758880 |
| C  | 0.90759726044276  | -1.11215465001575 | -3.89866210113667 |
| C  | 0.69102754634361  | 1.27090567718797  | -4.09756974558937 |
| C  | 1.31006547993018  | 0.08575705028768  | -4.46099362104556 |
| F  | -3.50348185749039 | -1.58639439626827 | -3.06994167238560 |
| F  | -4.63899181977610 | -3.98710600806189 | -2.60990724358546 |
| F  | -4.29935851919379 | -5.18199666402562 | -0.20657757608504 |
| F  | -2.84012638082337 | -3.98460590341323 | 1.71845811454126  |
| F  | -1.72194433657895 | -1.61441325572482 | 1.28209811289188  |
| F  | -0.44568289124582 | -2.28714724411804 | -2.43439411555128 |
| F  | 1.50731589491077  | -2.23956525907004 | -4.24233647374409 |
| F  | 2.28504596421778  | 0.09983325587989  | -5.34528554040532 |
| F  | 1.07882968829257  | 2.41199707510154  | -4.63648278511191 |
| F  | -0.91130504862759 | 2.37615457150048  | -2.83405477091558 |

|   |                   |                  |                   |
|---|-------------------|------------------|-------------------|
| F | -4.09081129333436 | 1.08540284008821 | 0.46128946970749  |
| F | -2.98471206808303 | 1.03831784380802 | -4.11259344760743 |
| F | -5.13670872279046 | 2.51092091419790 | -4.63846728561342 |
| F | -6.77167074588182 | 3.29692170118283 | -2.63891992449887 |
| F | -6.24862200148632 | 2.57929887287788 | -0.08557880802202 |

3<sup>0j</sup> E = -4724.790107872177 au [PBEh-3c]  
 ZPE = 0.17219103 au  
 G = -4723.17626229 au

|    |                   |                   |                   |
|----|-------------------|-------------------|-------------------|
| O  | -1.63073256344538 | 1.32811051919139  | -0.21929281901337 |
| Si | -0.10766140337627 | 1.61622356414079  | 0.66360552864125  |
| P  | -2.05364898902584 | 0.35358242850497  | -1.33870375564584 |
| Cl | 0.19883754573137  | 1.16652604558042  | 2.65570527981637  |
| Cl | 0.36973535056559  | -0.52545299068774 | 0.13790213501017  |
| Cl | 1.46971274215637  | 2.26342974798194  | -0.52089489686035 |
| Cl | -0.86985990443878 | 3.55125459684355  | 1.05562904749464  |
| C  | -3.55688113776042 | 1.09926770250226  | -2.02299559132837 |
| C  | -3.81705161849677 | 1.31561944058946  | -3.37069354044828 |
| C  | -4.53975210227058 | 1.47277649319971  | -1.10943420366048 |
| C  | -4.99156023781969 | 1.91229930648034  | -3.79033970744685 |
| C  | -5.71921156638189 | 2.06815268577530  | -1.50856026084867 |
| C  | -5.93933972361711 | 2.29377273762053  | -2.85710818773146 |
| C  | -2.64606370494078 | -1.24270295983575 | -0.76534236406512 |
| C  | -3.16699298973139 | -2.11873562810816 | -1.70871879113054 |
| C  | -2.71009234879384 | -1.60525390357324 | 0.57529566605447  |
| C  | -3.68922856515352 | -3.34379331442020 | -1.36051242227751 |
| C  | -3.23421093719455 | -2.83282341929139 | 0.94505676663540  |
| C  | -3.71608989351803 | -3.69919434342755 | -0.02031149742127 |
| C  | -0.80513412283478 | 0.26061300985376  | -2.62096234171495 |
| C  | -0.11851117622935 | -0.88938657534085 | -2.98971025944574 |
| C  | -0.40095192829713 | 1.47058432439482  | -3.17379569544773 |
| C  | 0.91935257844441  | -0.83477326460106 | -3.89720918334104 |
| C  | 0.63724079360995  | 1.54655596412578  | -4.07687267100272 |
| C  | 1.29660404991731  | 0.38399671890850  | -4.43750691259808 |
| F  | -3.15848856021313 | -1.75795340683148 | -2.98839395601476 |
| F  | -4.16542994533814 | -4.16618172831105 | -2.27895408667976 |
| F  | -4.21592149708983 | -4.86376721852820 | 0.33468661770020  |
| F  | -3.28924265163948 | -3.17511674580697 | 2.21865747271014  |
| F  | -2.31047839921291 | -0.79574028203929 | 1.52847697145284  |
| F  | -0.42695568781983 | -2.06210889281059 | -2.47051723076277 |
| F  | 1.56179343529333  | -1.93590646891724 | -4.24533213021529 |
| F  | 2.28771289838409  | 0.43520458837259  | -5.30118662188241 |
| F  | 1.00142650947606  | 2.70602702417320  | -4.59199181686458 |
| F  | -1.03253715550934 | 2.58111574327803  | -2.82666092576383 |

|   |                   |                  |                   |
|---|-------------------|------------------|-------------------|
| F | -4.36566150039481 | 1.22468753236973 | 0.17723760795728  |
| F | -2.95554009288409 | 0.94808228032452 | -4.30532097249089 |
| F | -5.21433652213373 | 2.11342679802955 | -5.07727317359817 |
| F | -7.05947862036609 | 2.85890873391798 | -3.25351195615579 |
| F | -6.63511348765070 | 2.41055750637164 | -0.62156240161595 |

**TS ( $3^{\circ}\text{i}+6^{\text{N}}\rightarrow 7^{\text{iN}}$ )** E = -3460.230098118337 au [PBEh-3c]

ZPE = 0.31903872 au

G = -3458.10059796 au

|   |                   |                   |                   |
|---|-------------------|-------------------|-------------------|
| P | 0.04492137051408  | 0.27490234216078  | 1.14635863726803  |
| C | -1.36187976329945 | -0.88930576786800 | 1.32065663173058  |
| C | -2.44218280365400 | -0.52691746739114 | 2.11485392557818  |
| C | -1.40106592232827 | -2.16443094762499 | 0.77552596566357  |
| C | -3.52094062681865 | -1.36896041521568 | 2.32663965248135  |
| C | -2.46034150417061 | -3.02577578043312 | 0.97688881312315  |
| C | -3.52836644666443 | -2.62846792831343 | 1.76063728603752  |
| C | 1.58651916552334  | -0.30966869177485 | 0.36544591552822  |
| C | 2.15660700322124  | -1.48786881652325 | 0.82615792502507  |
| C | 2.32899964928933  | 0.46076174579795  | -0.51523437469723 |
| C | 3.38292183229275  | -1.92939376829939 | 0.36357962230278  |
| C | 3.56412076182912  | 0.04937658352954  | -0.97196202618164 |
| C | 4.09083959010246  | -1.15401626844418 | -0.53328105962318 |
| C | -0.55010810088767 | 2.00369826515151  | 0.85914223412786  |
| C | -0.71550188914277 | 2.84334399277601  | 1.97695430698393  |
| C | -0.83074377227225 | 2.61414321849368  | -0.36898713632073 |
| C | -1.11623462494658 | 4.16447687013658  | 1.87243650720715  |
| C | -1.22809387396124 | 3.93394408521828  | -0.48295980397244 |
| C | -1.36994838581054 | 4.72123185067365  | 0.63839696865266  |
| F | 1.53505960568231  | -2.22881791316477 | 1.72793648602123  |
| F | 3.88642217028845  | -3.07548616788231 | 0.79083264697169  |
| F | 5.26696723656335  | -1.55826372984995 | -0.97740310374077 |
| F | 4.24881924667550  | 0.80046729927629  | -1.82382680424566 |
| F | 1.86512050516067  | 1.62076854617563  | -0.95741166571239 |
| F | -0.54931476967000 | 2.43919160063209  | 3.21701899978447  |
| F | -1.26491500588932 | 4.89359687979875  | 2.96462007104077  |
| F | -1.75181216729265 | 5.97733194814920  | 0.53101158262637  |
| F | -1.47287084852058 | 4.44288723823153  | -1.68361037157718 |
| F | -0.73792852224190 | 1.99737801475667  | -1.53730363990133 |
| F | -2.49492876272495 | 0.66966341799555  | 2.67594993467983  |
| F | -4.53987990459330 | -0.97106192681358 | 3.06960430971080  |
| F | -4.54859512016736 | -3.44275046971688 | 1.95452491995638  |
| F | -2.45720222590850 | -4.22620340947095 | 0.41368520072655  |
| F | -0.41639435671915 | -2.60588264720349 | -0.00246229314901 |
| O | 0.49433112295710  | 0.23235679135883  | 2.64908158125348  |

|    |                   |                   |                   |
|----|-------------------|-------------------|-------------------|
| Si | 1.98233523296594  | 0.90324007352139  | 3.37318592919841  |
| H  | -0.52172736272661 | -0.08193794239421 | -0.67332263313054 |
| H  | -0.39874484443487 | -0.47206344186249 | -1.60837884603531 |
| N  | -0.31489915961775 | -0.97166421296440 | -2.81276418777133 |
| C  | 0.80329704187765  | -1.91725808667553 | -2.88029729085607 |
| C  | -0.11594835430939 | 0.12895695681698  | -3.76072289194931 |
| C  | -1.60174053380335 | -1.63631247891401 | -3.03067769975673 |
| H  | 0.88214942825208  | -2.34988445344235 | -3.88047081453750 |
| H  | 1.73273066302548  | -1.40112251659692 | -2.65084659612409 |
| H  | 0.66313116178642  | -2.71859681234262 | -2.16244426284431 |
| H  | 0.78036780747223  | 0.68472388870379  | -3.49548582627975 |
| H  | -0.96650921994571 | 0.80390848408396  | -3.73284507264433 |
| H  | -0.00739718865548 | -0.25743977937572 | -4.77661203578659 |
| H  | -1.67552356679017 | -2.02909903603363 | -4.04697152579875 |
| H  | -2.40747787616476 | -0.92316322593847 | -2.86636882129216 |
| F  | 1.66992745806324  | -0.06351799298782 | 4.65664203182162  |
| F  | 3.32524115952479  | 0.10351048621950  | 2.91531421637061  |
| F  | 2.13986043505652  | 2.22084545265228  | 4.30428042632000  |
| F  | 2.05379140500221  | 1.88873085595647  | 1.99318762305937  |
| H  | -1.71526354899396 | -2.45810479274873 | -2.32789956732328 |

**TS (3<sup>o</sup>j+6<sup>N</sup>→7j<sup>N</sup>)** E = -4900.087892700379 au [PBEh-3c]

ZPE = 0.31359282 au

G = -4898.24865333 au

|   |                   |                   |                   |
|---|-------------------|-------------------|-------------------|
| P | 0.06238825463759  | 0.33318309194054  | 1.11257626168424  |
| C | -1.30459542611167 | -0.86405159448392 | 1.35114373863667  |
| C | -2.35380280070123 | -0.52597710371972 | 2.19767480087326  |
| C | -1.33681745280906 | -2.14359109138090 | 0.81371801956338  |
| C | -3.39375767661829 | -1.39699220222328 | 2.47271605053264  |
| C | -2.35702952317153 | -3.03419184283474 | 1.08057341461787  |
| C | -3.39263326563155 | -2.66150008087714 | 1.91777567867548  |
| C | 1.59220167780208  | -0.26288993076976 | 0.32679957181840  |
| C | 2.15232596989871  | -1.44596991801682 | 0.78667865240408  |
| C | 2.30876887429659  | 0.47123451271217  | -0.60619018370043 |
| C | 3.34859540457864  | -1.92486710130884 | 0.28215695198583  |
| C | 3.51234333254087  | 0.02146176914361  | -1.10579007714971 |
| C | 4.03131391650177  | -1.18540370251695 | -0.66302021590769 |
| C | -0.58088692570365 | 2.03582597284872  | 0.80069745608348  |
| C | -0.77705598573698 | 2.89060553335423  | 1.90287946765361  |
| C | -0.88500632740372 | 2.61069248464231  | -0.43950125991247 |
| C | -1.22943709593007 | 4.19195376114920  | 1.77282111705627  |
| C | -1.33284206091168 | 3.91156783997145  | -0.57818939102349 |
| C | -1.50572318476833 | 4.71392054310676  | 0.52819382636077  |
| F | 1.55211025422217  | -2.14763825419565 | 1.73226274061903  |

|    |                   |                   |                   |
|----|-------------------|-------------------|-------------------|
| F  | 3.84936436017404  | -3.06648769085855 | 0.72048388048386  |
| F  | 5.17971611674362  | -1.62224074244661 | -1.14503356622301 |
| F  | 4.17385574399581  | 0.73686310860217  | -2.00410511055552 |
| F  | 1.84967437004629  | 1.63097868278253  | -1.04870811287082 |
| F  | -0.57714951937997 | 2.52197854056533  | 3.14732526461951  |
| F  | -1.40005270632510 | 4.93690781418354  | 2.85034114516339  |
| F  | -1.93589483652536 | 5.95121736432743  | 0.39680935808202  |
| F  | -1.59775720173219 | 4.38654306704235  | -1.78794682380958 |
| F  | -0.76635355701450 | 1.97511465276754  | -1.59480347953533 |
| F  | -2.41406833794936 | 0.67367204275803  | 2.74862976896136  |
| F  | -4.38359820830551 | -1.02165004542116 | 3.26392122430952  |
| F  | -4.37486657201101 | -3.50361372821058 | 2.17278156988208  |
| F  | -2.34635212157841 | -4.24026296548342 | 0.53139875497048  |
| F  | -0.38159577548017 | -2.56565827933799 | -0.00827739256747 |
| O  | 0.53864963586280  | 0.34649427648482  | 2.61494597150071  |
| Si | 1.91128071320176  | 0.80045984593792  | 3.59665941324210  |
| H  | -0.51842188806043 | -0.08125523583285 | -0.70091206181642 |
| H  | -0.39601325480546 | -0.45805335129797 | -1.61348416246118 |
| N  | -0.30251453941495 | -0.95520988374131 | -2.85753552675035 |
| C  | 0.67310195007146  | -2.04772975306009 | -2.88846047517281 |
| C  | 0.10147239812909  | 0.11244575994291  | -3.77677313746906 |
| C  | -1.65606120223123 | -1.42815164162663 | -3.14890627423660 |
| H  | 0.79401156328709  | -2.42828352041930 | -3.90577390718953 |
| H  | 1.63768010671739  | -1.68735992314600 | -2.53634359706793 |
| H  | 0.35082159540912  | -2.86322516564630 | -2.25012982389995 |
| H  | 1.04931437118966  | 0.53887267257653  | -3.45686657969185 |
| H  | -0.64607402328548 | 0.89960836410917  | -3.79298264694189 |
| H  | 0.21629928432883  | -0.27982276199022 | -4.79018663755183 |
| H  | -1.73037409325937 | -1.82446745110325 | -4.16423344103513 |
| H  | -2.35827427577470 | -0.60389826491075 | -3.03804819950735 |
| Cl | 1.24389139994384  | -0.68959469354560 | 4.97542127871122  |
| Cl | 3.73411974310570  | -0.14310331218365 | 3.21943406769149  |
| Cl | 1.93390645195927  | 2.30048011073507  | 5.02591459907300  |
| Cl | 2.36619835488249  | 2.32301002135415  | 2.00439659395791  |
| H  | -1.92839600489563 | -2.21195060044849 | -2.44492855516624 |

**7i<sup>N</sup>** E = -3460.255137966063 au [PBEh-3c]

ZPE = 0.32733322 au

G = -3458.11176275 au

|   |                   |                   |                  |
|---|-------------------|-------------------|------------------|
| P | -0.16319078397723 | 0.26685345069742  | 1.00482614110432 |
| C | -1.47985027285917 | -0.93204592693060 | 1.51131378627908 |
| C | -2.33388621599421 | -0.69564382547163 | 2.57941702151750 |
| C | -1.65839041923734 | -2.12753892359716 | 0.83716419620454 |
| C | -3.31442829165830 | -1.60339911208056 | 2.94793367519493 |

|    |                   |                   |                   |
|----|-------------------|-------------------|-------------------|
| C  | -2.61216168599628 | -3.05964917148592 | 1.18933788841143  |
| C  | -3.44808526674294 | -2.79348389342800 | 2.25818510546461  |
| C  | 1.43746854793953  | -0.43556981922273 | 0.32422822357998  |
| C  | 1.95821802028244  | -1.63227018333112 | 0.78576801712557  |
| C  | 2.21894943840228  | 0.30516437803901  | -0.54105888580465 |
| C  | 3.19317500454017  | -2.09695069645966 | 0.37054568492464  |
| C  | 3.46352190695507  | -0.12338443089488 | -0.95955961829748 |
| C  | 3.95333055543800  | -1.33205156894854 | -0.49564999865036 |
| C  | -0.77112378250443 | 2.02905896615145  | 0.85115193238316  |
| C  | -0.88299775330757 | 2.91181566920537  | 1.93293840557111  |
| C  | -1.11863122059580 | 2.57728160615314  | -0.38561091526304 |
| C  | -1.30934849459880 | 4.22315267319039  | 1.78340046460872  |
| C  | -1.53498985997485 | 3.88184080945095  | -0.55715780310479 |
| C  | -1.63035168440447 | 4.71659279919114  | 0.53687584483793  |
| F  | 1.27406785640053  | -2.37354786493128 | 1.64377766857422  |
| F  | 3.65848187654330  | -3.25982563397080 | 0.80048742996189  |
| F  | 5.13704399235824  | -1.76360269806400 | -0.89946803514622 |
| F  | 4.17897651016755  | 0.60461969702705  | -1.81172514827241 |
| F  | 1.76292295346090  | 1.46003426917394  | -1.03334723328047 |
| F  | -0.63262778092404 | 2.56242677122496  | 3.17367035225254  |
| F  | -1.41471595672554 | 5.00928198261589  | 2.84183769259942  |
| F  | -2.03323321137658 | 5.96489696884751  | 0.38975719962110  |
| F  | -1.84199981622356 | 4.33179513939432  | -1.76991315248779 |
| F  | -1.07206150735444 | 1.87304285488545  | -1.52919797663944 |
| F  | -2.27882438943716 | 0.43474388331828  | 3.25645122533194  |
| F  | -4.12882229502216 | -1.33563784022499 | 3.95601347612714  |
| F  | -4.37655816826934 | -3.66685555592314 | 2.60666517202446  |
| F  | -2.73073530608421 | -4.19522445607619 | 0.51078430952979  |
| F  | -0.87906197499203 | -2.43103846727463 | -0.21406344456340 |
| O  | 0.45082089744997  | 0.33870549642059  | 2.48919120777627  |
| Si | 1.96068183142350  | 1.01333063777697  | 3.05962368540344  |
| H  | -0.68608034198975 | 0.07538879355989  | -0.35577074506857 |
| H  | 0.01930474183474  | -0.47141393920237 | -1.90820494604775 |
| N  | 0.04707885939156  | -0.81820800507651 | -2.88024755562765 |
| C  | 0.84965561846238  | -2.06716577753520 | -2.89419927686392 |
| C  | 0.67050990720420  | 0.22637836939493  | -3.73356432091982 |
| C  | -1.36517382925222 | -1.06204352328012 | -3.26511005150480 |
| H  | 0.92389595340909  | -2.42639364368321 | -3.91800053268986 |
| H  | 1.84198057994188  | -1.85579216993511 | -2.50567450326369 |
| H  | 0.37229217438527  | -2.81768547604308 | -2.27431050205416 |
| H  | 1.70193243506772  | 0.37893524245391  | -3.43208149195892 |
| H  | 0.12382891309727  | 1.15705760812857  | -3.62747629363693 |
| H  | 0.63948316806955  | -0.10842765879265 | -4.76763465251121 |
| H  | -1.39955516355362 | -1.43022779218570 | -4.28762328143397 |
| H  | -1.91953025945330 | -0.13158094394537 | -3.18608956000011 |

|   |                   |                   |                   |
|---|-------------------|-------------------|-------------------|
| F | 1.83720411615681  | 0.03007540819303  | 4.37202469445148  |
| F | 3.31041414047691  | 0.26528296992847  | 2.50878515646737  |
| F | 2.12061552884124  | 2.33948373698194  | 3.98518501759761  |
| F | 1.94692741497959  | 2.00411881894781  | 1.67698856720698  |
| H | -1.79485146839314 | -1.79699161048940 | -2.59180697474471 |

7j<sup>N</sup>      E = -4900.117290583997 au [PBEh-3c]  
               ZPE = 0.32218991 au  
               G = -4898.26591158 au

|   |                   |                   |                   |
|---|-------------------|-------------------|-------------------|
| P | -0.17629887135733 | 0.31828530486044  | 0.95790058900528  |
| C | -1.43853464225510 | -0.89999902555147 | 1.53347111860349  |
| C | -2.21744967542605 | -0.70225029733934 | 2.66656829403250  |
| C | -1.63442011164644 | -2.09144549677777 | 0.85444088382569  |
| C | -3.14204603402560 | -1.64375638695129 | 3.09070234088016  |
| C | -2.53269284265900 | -3.05480254339220 | 1.26160393165385  |
| C | -3.29362188988717 | -2.82714060995549 | 2.39360897506806  |
| C | 1.42235979890689  | -0.37668336602477 | 0.28688661588556  |
| C | 1.92376066731389  | -1.58980254843666 | 0.72914008739329  |
| C | 2.19561137952831  | 0.34425751550580  | -0.60487095712105 |
| C | 3.13237769157620  | -2.08830006076690 | 0.27367979394358  |
| C | 3.41897017287614  | -0.11464667221098 | -1.05301481712768 |
| C | 3.88873759748542  | -1.33954601945217 | -0.60858624059685 |
| C | -0.78291040192159 | 2.06953818386650  | 0.78289819385990  |
| C | -0.92166360078311 | 2.96802773406951  | 1.84886030110219  |
| C | -1.11387117418813 | 2.59469953072478  | -0.46919621895963 |
| C | -1.35030976070883 | 4.27449514521681  | 1.67009931373935  |
| C | -1.53065914020015 | 3.89432396198197  | -0.66929950559560 |
| C | -1.64960492792845 | 4.74604354402868  | 0.40979983425160  |
| F | 1.25187492740491  | -2.30822300492866 | 1.61307540272679  |
| F | 3.58083314463226  | -3.25894488396439 | 0.69567807164927  |
| F | 5.05170451201765  | -1.79613712624376 | -1.04172390823937 |
| F | 4.12803145008630  | 0.59563196346487  | -1.92378902497371 |
| F | 1.74639863204073  | 1.49828247990545  | -1.10026060719117 |
| F | -0.68931716145322 | 2.63935104157422  | 3.09703705063398  |
| F | -1.47674290197150 | 5.07626339160689  | 2.71341942362858  |
| F | -2.05438846521388 | 5.98921405616062  | 0.23467024562472  |
| F | -1.81793238038871 | 4.32273115758757  | -1.89418525294842 |
| F | -1.04219263174586 | 1.87096838499317  | -1.59912589867728 |
| F | -2.15217654761768 | 0.42061811746259  | 3.35111429254344  |
| F | -3.88766758578440 | -1.41268367436681 | 4.15801026391498  |
| F | -4.16893956670899 | -3.73092494612604 | 2.79489843480769  |
| F | -2.66787086882181 | -4.18456803393808 | 0.57699211869337  |
| F | -0.91953980357208 | -2.36504132450589 | -0.24990134014640 |
| O | 0.45973430185596  | 0.44420682272550  | 2.44759200728109  |

|    |                   |                   |                   |
|----|-------------------|-------------------|-------------------|
| Si | 1.84434856467056  | 0.87416411605530  | 3.33930704084277  |
| H  | -0.71912834507954 | 0.09321719004981  | -0.38092046512455 |
| H  | 0.01132318012864  | -0.45837060217838 | -1.98033958289469 |
| N  | 0.02789326184935  | -0.81537607854637 | -2.94668694626291 |
| C  | 0.80766220665836  | -2.07920782989926 | -2.94683219318862 |
| C  | 0.66892441346776  | 0.20907419490804  | -3.81217041389025 |
| C  | -1.38957716179672 | -1.03855232601159 | -3.32658186081396 |
| H  | 0.87417752482327  | -2.45164376850778 | -3.96631245639229 |
| H  | 1.80416616433486  | -1.88128761905370 | -2.56207724491268 |
| H  | 0.31740428540171  | -2.81357916824021 | -2.31750465253105 |
| H  | 1.70174685835926  | 0.35078762411655  | -3.50989505921185 |
| H  | 0.13531125711251  | 1.14887876505753  | -3.72004308455281 |
| H  | 0.63565338900362  | -0.13879928737580 | -4.84176027902310 |
| H  | -1.43102796907211 | -1.42287589383644 | -4.34281950098665 |
| H  | -1.92643875276799 | -0.09673530916304 | -3.26347236641949 |
| Cl | 1.30790208806606  | -0.66465207117352 | 4.74858410655737  |
| Cl | 3.68257877607519  | -0.03494660089122 | 2.87833447859935  |
| Cl | 1.90855598592808  | 2.34586494308314  | 4.80556473719798  |
| Cl | 2.25848392869743  | 2.44098768785738  | 1.76834685205747  |
| H  | -1.83248951416620 | -1.75408858307426 | -2.64100612669926 |
